# Supplementary material for: PITAR, a DNA damage-inducible Cancer/Testis long noncoding RNA, inactivates p53 by binding and stabilizing TRIM28 mRNA
Source: bioRxiv preprint, doi:10.1101/2023.04.11.536370, version 2 (2024-04-01)
Supplement: Supplementary Table 1.xlsx [file 536370_file03.xlsx]

## Sheet: Sheet1
Supplementary Table 1: Differentialy expressed Genes in GSC-DGC and GBM-Normal
Sr.No	Gene_id	Gene_Name	Gene_biotype	GSC_DGC	pvalue_(GSC_DGC)*	GBM_Normal	pvalue_(GBM_Normal)*
1	ENSG00000237380	HOXD-AS2	lncRNA	0.990463	0.00902497	5.90215	4.11e-13
2	ENSG00000130600	H19	lncRNA	3.21474	0.00148396	4.80008	0.000505048
3	ENSG00000231991	ANXA2P2	processed_pseudogene	-4.96216	1.48735e-07	4.79063	3.64574e-19
4	ENSG00000236552	RPL13AP5	processed_pseudogene	0.653548	0.0132817	4.14289	3.50598e-30
5	ENSG00000214826	BTN2A3P	transcribed_unprocessed_pseudogene	-0.830399	4.76003e-06	3.09374	6.98837e-07
6	ENSG00000214223	POM121L9P	transcribed_unprocessed_pseudogene	0.796003	0.000277638	2.8641	5.09308e-19
7	ENSG00000223839	HNRNPA1P10	processed_pseudogene	1.16809	2.20199e-07	2.83519	4.39e-05
8	ENSG00000234498	FAM95B1	transcribed_unprocessed_pseudogene	5.91061	0.00148396	2.79975	6.77831e-19
9	ENSG00000227036	TOB2P1	processed_pseudogene	0.039962	0.00580077	2.7662	1.3e-09
10	ENSG00000249859	APOC1P1	transcribed_unprocessed_pseudogene	0.465406	0.000205228	2.5408	1.57e-11
11	ENSG00000234618	GNAS-AS1	lncRNA	1.22233	0.00971824	2.33938	2.00754e-15
12	ENSG00000267104	RPSAP9	processed_pseudogene	0.92719	0.00276881	2.30087	1.58e-13
13	ENSG00000234741	TBC1D3P1-DHX40P1	lncRNA	0.818026	0.00782869	2.17396	1.63e-08
14	ENSG00000224020	GAS5	lncRNA	0.885245	0.0168556	2.08797	8.39675e-05
15	ENSG00000180764	MIR181A2HG	lncRNA	-0.929943	2.04046e-06	2.06387	1.43838e-19
16	ENSG00000232818	TMEM183B	processed_pseudogene	0.801793	6.95694e-05	2.04789	9.55162e-06
17	ENSG00000225217	PIPSL	transcribed_processed_pseudogene	1.75648	0.00314927	2.03287	0.00165515
18	ENSG00000167747	RPS2P32	processed_pseudogene	1.29084	0.000384036	2.01934	1.95842e-09
19	ENSG00000241749	HSPA7	unprocessed_pseudogene	1.92805	0.0324337	2.01535	0.00417042
20	ENSG00000183199	C19orf48	transcribed_unitary_pseudogene	0.696271	0.00117232	1.99423	1.1381e-10
21	ENSG00000213453	RPSAP52	transcribed_processed_pseudogene	0.983985	0.00180606	1.98972	6.56199e-10
22	ENSG00000231607	GPX1	polymorphic_pseudogene	0.272523	0.00309582	1.86573	3.02e-08
23	ENSG00000167920	AQP7P1	unprocessed_pseudogene	0.669473	9.44887e-06	1.84653	4.6213e-09
24	ENSG00000242125	TMEM99	lncRNA	-0.880486	0.00162533	1.68843	9.98e-08
25	ENSG00000134297	GTF2IP1	transcribed_unprocessed_pseudogene	0.313988	0.0129545	1.6824	5.89702e-09
26	ENSG00000227199	SNHG3	lncRNA	0.99769	0.00540234	1.64589	2.59921e-05
27	ENSG00000214783	PLEKHA8P1	transcribed_processed_pseudogene	0.60536	0.043366	1.63027	5.42269e-09
28	ENSG00000214783	ST7-AS1	lncRNA	1.49546	0.043366	1.61754	6.95e-10
29	ENSG00000220749	RNF5P1	processed_pseudogene	0.012247	0.0148499	1.59527	2.07207e-06
30	ENSG00000255717	RPL21P28	processed_pseudogene	0.951425	1.63653e-05	1.56722	3.45e-06
31	ENSG00000255198	TP53TG1	lncRNA	-0.487221	0.000341074	1.48154	9.07e-06
32	ENSG00000178977	SNHG9	lncRNA	1.3645	0.0132329	1.45149	3.10744e-05
33	ENSG00000204622	MT1L	transcribed_unprocessed_pseudogene	-0.450101	6.24348e-05	1.40643	0.000768884
34	ENSG00000213801	SNHG12	lncRNA	-0.181215	1.79211e-06	1.4	0.000124084
35	ENSG00000223705	ZNF321P	transcribed_processed_pseudogene	1.15315	0.0437114	1.3543	0.00281495
36	ENSG00000153363	MEIS3P1	processed_pseudogene	-0.434139	2.48427e-08	1.27947	0.000388421
37	ENSG00000237036	FAM86DP	transcribed_unprocessed_pseudogene	0.514513	0.0433122	1.24701	6.33629e-06
38	ENSG00000214922	ZEB1-AS1	lncRNA	0.865983	0.000197365	1.24363	0.00709702
39	ENSG00000247092	TPI1P2	transcribed_processed_pseudogene	0.110074	2.04305e-05	1.22566	0.000144893
40	ENSG00000215417	SNHG10	lncRNA	0.937924	0.0119341	1.21314	0.0344391
41	ENSG00000205763	SIGLEC16	polymorphic_pseudogene	-0.649516	0.00823946	1.19429	4.51211e-05
42	ENSG00000197182	SNHG5	lncRNA	-0.395705	0.0103074	1.18093	0.021464
43	ENSG00000240356	KANSL1-AS1	lncRNA	1.33058	0.00365104	1.02821	1.62031e-05
44	ENSG00000234585	STAG3L3	transcribed_unprocessed_pseudogene	-0.0448805	0.00184645	0.973067	0.000923153
45	ENSG00000179406	CCT6P3	transcribed_unprocessed_pseudogene	1.16563	0.0352241	0.963332	0.0316252
46	ENSG00000168405	LINC00472	lncRNA	-0.171721	0.0298584	0.938264	0.0398847
47	ENSG00000228409	CMAHP	transcribed_unitary_pseudogene	-0.926627	2.22815e-05	0.936104	0.00145164
48	ENSG00000182796	ZNF503-AS2	lncRNA	-0.90781	0.0253799	0.919745	0.00020855
49	ENSG00000228889	LINC00115	lncRNA	0.534163	0.000699007	0.905817	0.0304602
50	ENSG00000225648	UBAC2-AS1	lncRNA	1.72457	0.00529425	0.893452	9.63252e-05
51	ENSG00000198496	TIPARP-AS1	lncRNA	0.767851	0.0273484	0.890992	0.00318911
52	ENSG00000221953	MIR497HG	lncRNA	0.618098	0.043309	0.857581	0.0213664
53	ENSG00000254838	FAM86EP	transcribed_unprocessed_pseudogene	0.120436	0.0109416	0.850308	0.0453744
54	ENSG00000255248	TRAF3IP2-AS1	lncRNA	0.439802	5.97352e-05	0.800725	0.014907
55	ENSG00000245910	GHRLOS	lncRNA	0.768489	2.45294e-05	0.798113	0.00157604
56	ENSG00000225855	PCBP1-AS1	lncRNA	0.543048	0.0134903	0.636632	0.000478773
57	ENSG00000146556	SNHG4	lncRNA	0.487948	1.2511e-05	0.562258	0.0299715
58	ENSG00000188242	RBM26-AS1	lncRNA	1.13523	0.00743854	0.50851	0.0130461
59	ENSG00000224096	CYP4F24P	unprocessed_pseudogene	0.168012	0.0043694	0.498066	0.00509852
60	ENSG00000211451	CASC2	lncRNA	-0.165509	0.000119989	-0.478728	0.0244408
61	ENSG00000224165	LPAL2	transcribed_unprocessed_pseudogene	1.72555	0.0038678	-0.632596	0.0262949
62	ENSG00000205940	BMS1P1	transcribed_unprocessed_pseudogene	0.846441	0.0143415	-0.670365	0.0202563
63	ENSG00000238057	DNAJC27-AS1	lncRNA	0.875667	0.0127121	-0.720882	0.0350114
64	ENSG00000263006	C9orf139	lncRNA	0.650921	0.0122744	-0.732576	0.0480959
65	ENSG00000183935	TTC3P1	processed_pseudogene	0.59252	0.000167702	-0.806057	0.00446106
66	ENSG00000247556	ZEB2-AS1	lncRNA	1.51068	6.09403e-08	-0.828541	5.87e-07
67	ENSG00000237984	ROCK1P1	transcribed_unprocessed_pseudogene	-0.872658	1.22315e-05	-0.876906	0.00307873
68	ENSG00000198155	MIR31HG	lncRNA	-2.40268	0.0400843	-0.938124	0.00742361
69	ENSG00000248019	HTR7P1	transcribed_processed_pseudogene	-1.84484	0.00742256	-0.960766	0.00405034
70	ENSG00000178722	OIP5-AS1	lncRNA	1.48138	0.0269278	-0.990609	0.0176785
71	ENSG00000234420	RRN3P3	transcribed_unprocessed_pseudogene	0.67485	3.67089e-05	-1.1114	0.00107896
72	ENSG00000243742	FAM13A-AS1	lncRNA	1.1392	0.00826919	-1.16717	7.15832e-06
73	ENSG00000268654	KCNJ2-AS1	lncRNA	0.0372904	0.00411417	-1.38349	0.011806
74	ENSG00000278156	ZNF37BP	transcribed_processed_pseudogene	2.12578	0.0150123	-1.45426	9.27038e-05
75	ENSG00000280798	ZNF702P	transcribed_processed_pseudogene	0.783235	1.95902e-07	-1.57059	7.08502e-13
76	ENSG00000228223	RPLP0P2	transcribed_processed_pseudogene	0.553162	0.000550837	-1.65476	0.000949195
77	ENSG00000187984	FAM106A	lncRNA	1.31838	0.0194565	-1.73369	3.04868e-11
78	ENSG00000253771	TSC22D1-AS1	lncRNA	0.821191	0.000710642	-1.76315	0.000256101
79	ENSG00000236901	HCG11	lncRNA	-0.742559	0.0203437	-1.80485	5.8e-06
80	ENSG00000226287	MEG3	lncRNA	-0.0857647	0.0139431	-2.11032	5.79031e-09
81	ENSG00000133519	TPTE2P1	transcribed_unprocessed_pseudogene	1.6352	4.5714e-05	-2.14793	0.000522949
82	ENSG00000227825	CECR7	transcribed_unprocessed_pseudogene	1.03767	0.00305212	-2.30972	3.16733e-07
83	ENSG00000233532	ZNF204P	processed_pseudogene	-0.924348	0.0125776	-2.35376	0.000908848
84	ENSG00000229847	DLX6-AS1	lncRNA	1.38981	0.03619	-2.73084	1.08e-05
85	ENSG00000154874	LINC00460	lncRNA	-0.979548	7.19732e-05	-2.81859	5.74871e-06
86	ENSG00000152931	EMX2OS	lncRNA	0.959579	0.00135218	-2.98394	5.36912e-11
87	ENSG00000168779	FAM201A	lncRNA	-0.54384	0.00139519	-3.73612	1.4431e-23
88	ENSG00000131747	PART1	lncRNA	1.69775	0.00101176	-4.09114	4.48491e-27
89	ENSG00000101057	HAR1A	lncRNA	0.474777	1.94278e-10	-4.34146	2.42363e-25
90	ENSG00000175063	SHOX2	protein_coding	-0.828758	5.63131e-06	7.35589	7.13813e-29
91	ENSG00000168078	TOP2A	protein_coding	0.621704	0.0277269	7.28618	8.13377e-27
92	ENSG00000106004	MYBL2	protein_coding	2.03514	0.00489733	7.25833	9.9702e-15
93	ENSG00000089685	PBK	protein_coding	0.6523	0.000717676	6.91341	1.61784e-24
94	ENSG00000253293	HOXC10	protein_coding	-0.558904	0.000872291	6.36341	1.44863e-10
95	ENSG00000178999	HOXD10	protein_coding	-0.00500103	0.00303223	6.33198	8.38486e-24
96	ENSG00000105997	EN1	protein_coding	0.430357	0.000271256	6.25823	4.10875e-11
97	ENSG00000135451	HOXA10	protein_coding	-2.49315	2.24082e-06	6.25599	4.95709e-23
98	ENSG00000120093	AURKB	protein_coding	0.701465	0.000101278	6.21078	3.0851e-09
99	ENSG00000133110	HOXA3	protein_coding	1.33254	0.00111968	6.11048	9.73168e-07
100	ENSG00000080986	POSTN	protein_coding	-3.81283	0.00776938	5.97269	1.24552e-26
101	ENSG00000123485	PITX1	protein_coding	-0.0712029	7.32563e-05	5.87406	6.27415e-24
102	ENSG00000115457	HOXD8	protein_coding	-0.381416	0.0128061	5.83813	1.62765e-18
103	ENSG00000260027	NDC80	protein_coding	0.899867	0.0124125	5.79608	8.32253e-10
104	ENSG00000148773	HJURP	protein_coding	0.877055	9.2433e-05	5.76322	5.54183e-18
105	ENSG00000115163	IGF2BP3	protein_coding	0.53682	0.00176313	5.6329	4.13059e-24
106	ENSG00000168542	HOXD13	protein_coding	0.135715	0.000497986	5.54626	1.11237e-09
107	ENSG00000056678	CENPA	protein_coding	1.1005	0.00726717	5.52969	9.60118e-19
108	ENSG00000093009	E2F8	protein_coding	-0.420999	1.1997e-07	5.46242	1.04389e-19
109	ENSG00000137804	COL3A1	protein_coding	-5.23733	0.00137107	5.39811	1.52744e-22
110	ENSG00000157456	CDCA2	protein_coding	0.262475	0.000682117	5.32343	4.57162e-21
111	ENSG00000169679	KIFC1	protein_coding	0.567862	1.83761e-06	5.32118	6.00073e-24
112	ENSG00000007968	CCNB2	protein_coding	0.779613	1.04168e-06	5.26447	1.35228e-16
113	ENSG00000105996	MEOX2	protein_coding	-0.352825	0.0101884	5.2083	3.42941e-07
114	ENSG00000138180	HOXD11	protein_coding	0.310611	0.0016002	5.20652	1.81565e-27
115	ENSG00000133048	E2F2	protein_coding	1.84549	0.0417478	5.1864	4.64693e-07
116	ENSG00000118193	METTL7B	protein_coding	0.310004	0.00265946	5.17124	7.84053e-20
117	ENSG00000197576	HOXA2	protein_coding	1.41719	0.0209629	5.14474	1.57821e-06
118	ENSG00000182742	CEP55	protein_coding	-0.700483	0.0134558	5.14347	2.22718e-06
119	ENSG00000173917	CHI3L1	protein_coding	-2.44428	0.000778396	5.13507	2.7551e-07
120	ENSG00000134668	HOXB4	protein_coding	-1.98075	6.52129e-10	5.11957	7.40629e-10
121	ENSG00000075218	HOXB2	protein_coding	-3.24554	0.00134769	5.10295	9.50303e-20
122	ENSG00000187498	GSC	protein_coding	0.36803	0.000143642	5.09614	1.01689e-17
123	ENSG00000102359	HOXA7	protein_coding	-0.802525	0.0130795	5.08574	1.90736e-12
124	ENSG00000108846	GTSE1	protein_coding	0.649151	3.18479e-06	5.04631	7.1891e-10
125	ENSG00000090889	SRPX2	protein_coding	-2.06096	0.049467	4.93896	1.23723e-20
126	ENSG00000171657	TTK	protein_coding	0.0886285	8.0949e-05	4.90184	4.01796e-17
127	ENSG00000197757	KIF4A	protein_coding	0.452302	0.000200387	4.87791	8.17269e-09
128	ENSG00000166741	CDK1	protein_coding	0.733829	7.36613e-12	4.83374	7.52086e-08
129	ENSG00000171320	SKA1	protein_coding	-0.376083	0.0364997	4.82797	2.34288e-17
130	ENSG00000181104	GPR82	protein_coding	1.59476	2.70839e-05	4.8231	1.33949e-26
131	ENSG00000142945	NNMT	protein_coding	-5.98776	0.000891655	4.81723	8.08342e-19
132	ENSG00000143476	ESCO2	protein_coding	1.16016	0.000223812	4.80803	3.79513e-17
133	ENSG00000120708	F2R	protein_coding	-3.84934	4.08558e-05	4.78053	2.38742e-13
134	ENSG00000066279	DTL	protein_coding	0.786855	0.010126	4.76349	1.05128e-14
135	ENSG00000164294	ASPM	protein_coding	0.400222	1.24561e-09	4.65455	2.02175e-13
136	ENSG00000106462	GPX8	protein_coding	-2.44643	0.00284402	4.59608	1.37282e-20
137	ENSG00000117399	HOXC9	protein_coding	0.162177	8.82771e-05	4.5008	3.52165e-16
138	ENSG00000158402	CENPK	protein_coding	0.0959985	2.85555e-05	4.49171	2.28564e-15
139	ENSG00000108821	CA9	protein_coding	-2.15787	4.04918e-13	4.45634	2.77585e-06
140	ENSG00000143228	CDC25C	protein_coding	1.34382	0.000120573	4.4283	5.45255e-16
141	ENSG00000135476	NUF2	protein_coding	0.85297	0.00432024	4.3488	6.62997e-16
142	ENSG00000276043	TUBA1C	protein_coding	-0.00121859	0.00498703	4.32284	1.77999e-13
143	ENSG00000088882	UHRF1	protein_coding	0.850306	8.7112e-09	4.28387	5.18003e-13
144	ENSG00000144354	HOXC13	protein_coding	-0.749094	1.52658e-07	4.27964	9.72258e-19
145	ENSG00000161888	DMRTA2	protein_coding	0.551972	0.00048877	4.20129	5.26267e-14
146	ENSG00000116833	HOXA11	protein_coding	-0.613216	0.0260618	4.18705	2.86694e-18
147	ENSG00000091879	PDPN	protein_coding	-0.105705	0.00216638	4.17884	2.78398e-15
148	ENSG00000137807	MAGED4	protein_coding	0.287037	0.00806755	4.15783	2.48281e-16
149	ENSG00000086991	SPC24	protein_coding	0.842524	0.0110328	4.14859	1.54705e-16
150	ENSG00000109705	KIF23	protein_coding	-0.461951	0.0143925	4.13232	1.5786e-07
151	ENSG00000117122	MDK	protein_coding	-0.176224	0.00034514	4.1139	8.65318e-08
152	ENSG00000134690	NKX3-2	protein_coding	-2.08178	0.00573421	4.10678	1.1411e-15
153	ENSG00000169607	MFAP2	protein_coding	-4.14464	0.0469123	4.09954	6.1666e-15
154	ENSG00000085840	CDCA8	protein_coding	0.811618	8.73624e-06	4.09887	3.59378e-17
155	ENSG00000006327	ANXA1	protein_coding	-0.181908	2.80592e-05	4.09606	1.46026e-13
156	ENSG00000003436	NEIL3	protein_coding	-0.406883	1.7962e-07	4.09427	6.04919e-13
157	ENSG00000121152	CKAP2L	protein_coding	0.619032	0.000218086	4.09132	9.78511e-15
158	ENSG00000163661	ORC1	protein_coding	2.29278	0.0136421	4.08981	5.2891e-07
159	ENSG00000157150	TNFRSF12A	protein_coding	-2.93119	0.000119661	4.08445	1.7526e-10
160	ENSG00000182718	TFPI	protein_coding	-2.91062	5.86763e-08	4.08402	1.49924e-14
161	ENSG00000104147	NCAPH	protein_coding	1.11395	6.5654e-05	4.08178	7.23733e-17
162	ENSG00000205929	TIMP4	protein_coding	3.47596	3.19868e-05	4.06567	2.23361e-08
163	ENSG00000136542	TMSB15A	protein_coding	0.928287	1.64524e-05	4.01996	6.91541e-06
164	ENSG00000134339	IRX1	protein_coding	0.491315	0.00150639	4.01902	0.00243055
165	ENSG00000102007	HMMR	protein_coding	0.223336	0.000298874	4.01842	6.2472e-14
166	ENSG00000188219	LEFTY2	protein_coding	-0.725544	6.32938e-07	4.01611	4.94368e-33
167	ENSG00000106366	GALNT5	protein_coding	-3.9799	9.42022e-07	4.01142	2.53958e-07
168	ENSG00000037965	SAA2	protein_coding	1.92613	0.00115141	3.98922	8.82785e-06
169	ENSG00000100162	POTEE	protein_coding	-0.863671	0.000445542	3.96547	1.39307e-14
170	ENSG00000149257	SERPINE1	protein_coding	-4.21251	0.00540637	3.9629	4.48378e-19
171	ENSG00000164920	HOXC8	protein_coding	-1.82897	3.55135e-07	3.94843	1.16914e-08
172	ENSG00000115107	CENPM	protein_coding	0.845688	0.0114598	3.92554	2.4217e-12
173	ENSG00000072694	SERPINH1	protein_coding	-2.84352	0.0375645	3.92394	7.65673e-07
174	ENSG00000088325	FCGR2B	protein_coding	1.97178	0.00362852	3.90112	1.9336e-14
175	ENSG00000122861	IGFBP3	protein_coding	-1.22631	1.35325e-05	3.88741	2.48604e-09
176	ENSG00000127863	COL4A2	protein_coding	-0.638295	0.000158614	3.88461	1.50627e-17
177	ENSG00000112559	TPX2	protein_coding	0.61474	8.81221e-05	3.87339	6.21798e-09
178	ENSG00000123975	TNFRSF19	protein_coding	3.19745	0.00279809	3.84208	6.54901e-16
179	ENSG00000181458	MDFI	protein_coding	3.79859	5.3066e-06	3.8388	1.50678e-13
180	ENSG00000126778	TBX5	protein_coding	0.171709	0.00771281	3.8355	5.4868e-08
181	ENSG00000087245	CKS2	protein_coding	0.938845	3.06157e-05	3.83329	1.97156e-12
182	ENSG00000157227	TMEM45A	protein_coding	-1.7048	3.41654e-09	3.80595	5.66091e-13
183	ENSG00000152253	IRX3	protein_coding	0.205188	3.08862e-05	3.78484	1.70601e-12
184	ENSG00000113083	SIX1	protein_coding	-0.689782	2.67871e-09	3.78444	4.381e-07
185	ENSG00000116039	MMP2	protein_coding	-2.25474	0.0201125	3.77847	1.10488e-09
186	ENSG00000253626	MMP14	protein_coding	-6.12303	0.00195011	3.77399	1.14577e-27
187	ENSG00000026025	SPC25	protein_coding	1.1743	1.00247e-07	3.76443	3.31237e-25
188	ENSG00000051180	LOX	protein_coding	-6.04796	4.79973e-05	3.76191	1.08753e-15
189	ENSG00000187840	ATP6V1B1	protein_coding	1.27828	0.0108753	3.75788	5.00831e-27
190	ENSG00000129654	EIF5AL1	protein_coding	0.558928	3.95908e-06	3.74359	5.82378e-06
191	ENSG00000164611	VIM	protein_coding	-1.81659	0.000293433	3.73618	1.21941e-15
192	ENSG00000240583	EIF4EBP1	protein_coding	0.755989	0.0411342	3.7253	2.69373e-06
193	ENSG00000104055	FOXJ1	protein_coding	2.56426	0.00841829	3.71491	1.01188e-05
194	ENSG00000254726	AQP1	protein_coding	-2.52035	0.00026727	3.70017	9.54629e-09
195	ENSG00000123374	TGM5	protein_coding	-1.16412	0.00185461	3.69543	1.8788e-28
196	ENSG00000134013	ABCA13	protein_coding	0.407818	4.32294e-09	3.69297	1.02038e-09
197	ENSG00000197646	MEX3A	protein_coding	2.12259	4.65075e-13	3.69104	4.44598e-10
198	ENSG00000174371	CDK2	protein_coding	0.483105	0.000124318	3.68581	1.07146e-12
199	ENSG00000156869	GSX1	protein_coding	0.996524	0.0301157	3.67037	6.18122e-14
200	ENSG00000026508	LOXL2	protein_coding	-3.28595	2.42108e-06	3.66684	5.72931e-12
201	ENSG00000140682	PDCD1LG2	protein_coding	-3.80519	0.0231076	3.65256	7.31671e-22
202	ENSG00000144810	FRRS1	protein_coding	-1.14572	6.74105e-08	3.649	6.5495e-05
203	ENSG00000164692	CD44	protein_coding	-2.57466	5.91008e-14	3.64007	6.53594e-06
204	ENSG00000142227	TGFB1I1	protein_coding	-0.827861	0.00119569	3.63797	1.71045e-11
205	ENSG00000186871	GATA4	protein_coding	1.63423	0.04212	3.61435	3.30503e-13
206	ENSG00000188015	COL8A1	protein_coding	-5.81351	0.000483831	3.58778	6.41841e-10
207	ENSG00000131203	EMP3	protein_coding	-1.50816	0.00407703	3.57634	9.23208e-05
208	ENSG00000113368	ERCC6L	protein_coding	-1.24168	3.86271e-05	3.56962	8.16626e-13
209	ENSG00000115414	SERINC2	protein_coding	-1.21944	4.85173e-08	3.56722	2.04493e-11
210	ENSG00000111247	FN1	protein_coding	-2.53548	0.000403076	3.52454	1.85311e-17
211	ENSG00000162873	FMOD	protein_coding	0.345935	0.00150236	3.51504	2.33341e-08
212	ENSG00000159184	RAD51AP1	protein_coding	1.02326	0.000373745	3.51194	0.00317229
213	ENSG00000197696	TBX15	protein_coding	0.280021	0.00264307	3.51004	3.17877e-09
214	ENSG00000121005	PAX3	protein_coding	0.0977475	3.78857e-07	3.50536	1.09097e-12
215	ENSG00000091986	CNGA3	protein_coding	0.829352	4.08702e-05	3.50161	2.69965e-16
216	ENSG00000168505	CRISPLD1	protein_coding	5.42716	0.0407765	3.49786	0.000199382
217	ENSG00000116962	GBX2	protein_coding	1.94483	0.0253665	3.48426	5.66471e-13
218	ENSG00000117724	CA12	protein_coding	1.86262	0.000935671	3.47661	8.57587e-09
219	ENSG00000206394	ID3	protein_coding	-1.15347	0.000204243	3.46515	1.32337e-17
220	ENSG00000253506	CLIC1	protein_coding	-1.22089	0.00338257	3.44	3.42615e-29
221	ENSG00000137404	NACA2	protein_coding	0.615179	0.0352467	3.41454	5.60715e-24
222	ENSG00000175832	SERPINA5	protein_coding	0.55493	9.34921e-06	3.40824	1.66704e-06
223	ENSG00000137310	CMTM3	protein_coding	-0.393446	0.000151486	3.40614	1.03462e-15
224	ENSG00000117228	NRM	protein_coding	0.853504	3.52401e-06	3.393	1.49556e-09
225	ENSG00000102265	CDKN2C	protein_coding	0.387861	2.07444e-07	3.37743	1.13307e-07
226	ENSG00000175445	CARD16	protein_coding	-1.81194	4.00817e-05	3.37737	4.55599e-08
227	ENSG00000101825	GJA3	protein_coding	1.31573	1.51421e-06	3.36767	2.64369e-05
228	ENSG00000137441	MXRA5	protein_coding	-3.357	0.0458153	3.3542	0.000215801
229	ENSG00000165071	ISL2	protein_coding	0.130031	0.00210297	3.33739	5.26764e-09
230	ENSG00000163808	LRRN4CL	protein_coding	-1.04153	9.31037e-06	3.30925	2.44867e-10
231	ENSG00000113140	FGFBP2	protein_coding	-1.6428	1.87902e-09	3.30766	7.80296e-23
232	ENSG00000100504	TMEM71	protein_coding	-1.32213	0.0324412	3.30227	5.54169e-16
233	ENSG00000135446	CSRP2	protein_coding	-0.845947	7.46411e-06	3.29149	2.09342e-05
234	ENSG00000197747	KIF15	protein_coding	1.66762	0.0017503	3.28877	8.74937e-08
235	ENSG00000163191	SPARC	protein_coding	-2.10404	9.0553e-07	3.27462	4.535e-12
236	ENSG00000108511	S100A10	protein_coding	-1.84503	7.94926e-05	3.26476	0.000211772
237	ENSG00000144481	BRIP1	protein_coding	-0.0412139	0.000701524	3.25907	3.8342e-06
238	ENSG00000174807	HOXB6	protein_coding	-3.52612	0.0385249	3.2588	1.46121e-09
239	ENSG00000035499	AURKA	protein_coding	0.308953	0.000367902	3.25771	4.45549e-10
240	ENSG00000173110	TRPM8	protein_coding	2.10045	0.00735102	3.25613	8.36905e-08
241	ENSG00000166851	CD248	protein_coding	-1.9458	0.00726987	3.25518	1.98859e-10
242	ENSG00000251493	DEPDC1B	protein_coding	1.52156	0.000123785	3.2547	4.88714e-09
243	ENSG00000106066	HSPA6	protein_coding	1.72413	2.96838e-05	3.25233	3.48378e-10
244	ENSG00000002586	PLK1	protein_coding	0.967603	0.0023536	3.24697	1.02086e-14
245	ENSG00000158710	FOXD1	protein_coding	-1.86359	0.000209478	3.24424	5.95726e-13
246	ENSG00000128342	TK1	protein_coding	0.02798	0.000178778	3.23678	0.000179734
247	ENSG00000051341	CD99	protein_coding	-1.54292	0.0189869	3.22424	4.16084e-11
248	ENSG00000205403	TAGLN2	protein_coding	-1.65249	0.0109293	3.22395	9.80764e-08
249	ENSG00000131153	TEAD2	protein_coding	0.667347	3.12703e-07	3.21485	6.30156e-12
250	ENSG00000164649	TACC3	protein_coding	0.319376	0.0129937	3.17638	3.87763e-11
251	ENSG00000168679	ARHGAP11A	protein_coding	0.870844	2.84926e-05	3.17162	5.5393e-11
252	ENSG00000162645	CELSR1	protein_coding	0.494282	8.81815e-09	3.16728	3.28637e-10
253	ENSG00000125430	EME1	protein_coding	-0.289787	1.27857e-05	3.14575	4.19598e-05
254	ENSG00000139329	TFAP2A	protein_coding	-0.526714	0.000308814	3.13848	0.000125274
255	ENSG00000170689	PPP1R14B	protein_coding	0.0926345	3.85455e-05	3.13427	7.04005e-05
256	ENSG00000164362	EN2	protein_coding	-0.494364	7.17025e-06	3.13392	0.00011725
257	ENSG00000089157	LUM	protein_coding	-5.00601	0.0299354	3.12023	1.03429e-22
258	ENSG00000130675	HOXB9	protein_coding	-3.43181	0.000288434	3.11808	0.00144848
259	ENSG00000166130	MNX1	protein_coding	2.6156	0.0140151	3.10644	7.79161e-22
260	ENSG00000163453	TSPAN6	protein_coding	0.154659	2.05366e-08	3.10603	3.97085e-12
261	ENSG00000129474	EIF3CL	protein_coding	0.495511	4.10062e-08	3.1049	1.32002e-14
262	ENSG00000239887	WDR38	protein_coding	0.367085	0.0031362	3.10429	2.59112e-13
263	ENSG00000140451	IKBIP	protein_coding	-0.702405	1.19895e-05	3.10424	3.06634e-09
264	ENSG00000115380	AJUBA	protein_coding	-2.94722	2.00891e-07	3.08889	1.18198e-06
265	ENSG00000176890	PIF1	protein_coding	1.85233	7.12978e-06	3.08621	2.63022e-11
266	ENSG00000164220	HLA-DRA	protein_coding	0.351902	4.17494e-08	3.0862	9.70221e-06
267	ENSG00000162458	EFEMP1	protein_coding	-5.36732	0.0126215	3.07756	3.23062e-07
268	ENSG00000115232	SLC47A2	protein_coding	-1.27936	0.0382448	3.07567	1.26191e-08
269	ENSG00000180061	TYMS	protein_coding	1.95854	0.0111902	3.07112	8.75138e-08
270	ENSG00000196954	F2RL2	protein_coding	-4.93321	8.13492e-08	3.06818	9.01204e-13
271	ENSG00000106333	FBLIM1	protein_coding	1.26907	0.000216396	3.06449	6.98736e-06
272	ENSG00000180871	TMEM150B	protein_coding	1.17919	0.00443487	3.05238	2.61711e-07
273	ENSG00000214274	FKBP10	protein_coding	-0.268131	0.0010841	3.03711	1.33134e-12
274	ENSG00000128602	CXCR2	protein_coding	1.25289	0.0166596	3.03559	2.20338e-15
275	ENSG00000172061	ANG	protein_coding	-1.69104	5.51566e-09	3.03182	0.00163437
276	ENSG00000173894	SMO	protein_coding	1.81884	0.000241785	3.02667	1.52345e-07
277	ENSG00000121039	LRRC15	protein_coding	-3.30439	0.0014158	3.01679	3.34121e-08
278	ENSG00000161638	FCGR2A	protein_coding	0.52502	9.8241e-06	3.00886	9.4715e-11
279	ENSG00000120068	WDR76	protein_coding	0.180978	0.0180423	3.00122	0.00708827
280	ENSG00000175505	ITGA5	protein_coding	-4.4861	1.42866e-11	2.99739	8.30988e-07
281	ENSG00000134057	SIX6	protein_coding	2.78338	0.00120945	2.97305	7.29163e-11
282	ENSG00000168938	HMGA2	protein_coding	-0.0973286	5.64297e-05	2.95987	1.95806e-14
283	ENSG00000102384	FBXO43	protein_coding	0.214747	0.00353843	2.95389	1.02039e-11
284	ENSG00000132256	PLEKHG2	protein_coding	0.0753362	0.000112019	2.95116	2.20487e-16
285	ENSG00000164111	ESM1	protein_coding	0.0532201	3.77888e-07	2.94872	4.28555e-17
286	ENSG00000102524	PPIC	protein_coding	-1.53459	0.0125706	2.94693	7.80936e-09
287	ENSG00000110195	CENPI	protein_coding	-0.946667	0.0408104	2.94685	6.46802e-05
288	ENSG00000134531	TRIM5	protein_coding	-1.6676	1.4729e-10	2.9454	1.36408e-08
289	ENSG00000128652	FOLR1	protein_coding	-1.66657	0.0324077	2.94076	1.20248e-05
290	ENSG00000137752	ZIC1	protein_coding	-0.600308	9.25137e-08	2.93686	1.85768e-10
291	ENSG00000135862	PRR11	protein_coding	0.00129216	0.0458931	2.93593	6.1044e-12
292	ENSG00000127533	SLC43A3	protein_coding	0.244745	0.0147602	2.93119	3.65559e-07
293	ENSG00000144554	CASP1	protein_coding	-3.33282	0.0187058	2.92743	4.25652e-12
294	ENSG00000124766	PRRX1	protein_coding	-0.693129	0.00237338	2.91747	1.49395e-06
295	ENSG00000163430	BTN3A2	protein_coding	0.325945	5.23644e-09	2.90743	9.30438e-15
296	ENSG00000213694	SOX4	protein_coding	1.42793	0.0204547	2.90561	1.37273e-11
297	ENSG00000175093	EDA2R	protein_coding	-0.314624	5.58137e-06	2.90558	5.62486e-07
298	ENSG00000153044	SHCBP1	protein_coding	0.124035	0.0175764	2.90351	5.30627e-12
299	ENSG00000140525	FSTL1	protein_coding	-3.78626	0.000301494	2.90254	8.31073e-11
300	ENSG00000011028	S1PR3	protein_coding	-1.86957	3.82194e-05	2.90088	2.33639e-08
301	ENSG00000159403	CENPH	protein_coding	0.505526	8.92172e-05	2.89723	4.44822e-07
302	ENSG00000148848	FANCI	protein_coding	1.40542	0.0297924	2.88901	2.20892e-06
303	ENSG00000130635	CD58	protein_coding	0.0834176	3.09286e-06	2.88496	0.000339087
304	ENSG00000168268	ADAM12	protein_coding	-2.02451	0.000582358	2.88427	2.82344e-13
305	ENSG00000136518	SLC11A1	protein_coding	1.11875	0.0186349	2.88192	3.6708e-24
306	ENSG00000188452	COL5A1	protein_coding	-4.69334	0.0306136	2.87909	2.46535e-09
307	ENSG00000196754	SLC34A2	protein_coding	0.158349	0.0180714	2.87071	5.37569e-09
308	ENSG00000146425	S100A2	protein_coding	-2.18685	0.00310707	2.85433	8.1921e-21
309	ENSG00000111012	CLEC18B	protein_coding	-0.591226	0.000839657	2.84935	0.000611497
310	ENSG00000113739	EGFLAM	protein_coding	-0.711179	4.84366e-10	2.84798	1.78749e-05
311	ENSG00000163694	DYNLT1	protein_coding	-0.61297	6.73442e-05	2.84723	3.32812e-09
312	ENSG00000213988	GNG5	protein_coding	0.098667	0.000252976	2.84721	6.56312e-11
313	ENSG00000152766	CYP27B1	protein_coding	1.96095	0.00888573	2.84692	5.16124e-06
314	ENSG00000142173	STC2	protein_coding	-5.36134	7.23533e-07	2.8467	0.000523537
315	ENSG00000105137	ANKRD22	protein_coding	1.22949	3.69224e-07	2.83882	8.20708e-23
316	ENSG00000163017	PSMB9	protein_coding	-1.20048	0.0250755	2.83302	0.000107833
317	ENSG00000162692	KIF11	protein_coding	0.0310535	0.00188252	2.82702	5.20186e-06
318	ENSG00000103855	VEPH1	protein_coding	-0.317666	0.0416515	2.82459	1.64596e-19
319	ENSG00000118785	ACTG2	protein_coding	-2.19424	8.30805e-08	2.82136	3.97315e-05
320	ENSG00000050405	SPP1	protein_coding	-2.96801	0.000268805	2.81661	1.89108e-12
321	ENSG00000008517	POLE2	protein_coding	-0.150244	2.35549e-07	2.8105	6.68153e-07
322	ENSG00000078081	RAB13	protein_coding	-0.52804	0.0198986	2.80894	2.81257e-09
323	ENSG00000106819	AR	protein_coding	-1.2669	0.00717208	2.80555	2.23024e-05
324	ENSG00000180198	LAMP3	protein_coding	0.77723	6.86357e-05	2.80313	1.57361e-19
325	ENSG00000145287	EBF2	protein_coding	0.780117	0.00104495	2.80213	7.47812e-05
326	ENSG00000106025	ASPN	protein_coding	-3.90997	0.00810727	2.79976	1.17961e-06
327	ENSG00000173918	CDH15	protein_coding	0.374525	0.020268	2.76853	1.49018e-06
328	ENSG00000204262	HLA-DPA1	protein_coding	0.763487	1.52226e-12	2.76778	6.84702e-07
329	ENSG00000155760	LRR1	protein_coding	0.222003	0.000485257	2.76578	2.35675e-07
330	ENSG00000197587	COL22A1	protein_coding	-0.77033	0.0135292	2.76276	0.000573445
331	ENSG00000141510	COL5A2	protein_coding	-5.8303	0.00546754	2.7579	2.62645e-15
332	ENSG00000106624	FZD7	protein_coding	-3.32124	0.035582	2.75734	1.2633e-05
333	ENSG00000155660	TP53	protein_coding	0.532245	0.0378698	2.74556	2.11029e-16
334	ENSG00000119630	AEBP1	protein_coding	0.81469	0.0120135	2.74248	2.82264e-07
335	ENSG00000105835	VAMP8	protein_coding	0.112045	7.01471e-06	2.73341	9.8614e-06
336	ENSG00000128606	PGF	protein_coding	-1.45362	0.000128667	2.72809	1.50473e-05
337	ENSG00000112715	CENPE	protein_coding	0.311816	0.00537349	2.72503	0.000140346
338	ENSG00000166482	CD70	protein_coding	-0.00595837	0.000453727	2.71613	1.4973e-05
339	ENSG00000101447	LRRC17	protein_coding	-2.51854	0.0134781	2.71584	2.58719e-06
340	ENSG00000140832	VEGFA	protein_coding	-1.81125	0.0078807	2.71281	0.000314603
341	ENSG00000183765	MFAP4	protein_coding	-4.0735	2.83414e-05	2.71159	2.52783e-16
342	ENSG00000117226	FAM83D	protein_coding	0.633494	5.51325e-05	2.70824	0.000299753
343	ENSG00000197956	MARVELD3	protein_coding	1.48069	1.48954e-05	2.70157	1.2371e-08
344	ENSG00000138449	CDCP1	protein_coding	0.618026	0.0116173	2.70115	7.606e-09
345	ENSG00000049192	S100A6	protein_coding	-5.1407	0.0287347	2.69443	1.07529e-08
346	ENSG00000116035	SLC40A1	protein_coding	-1.36525	0.00348662	2.69323	5.26429e-06
347	ENSG00000146678	PARPBP	protein_coding	0.268498	0.022737	2.69272	1.55827e-05
348	ENSG00000065320	ADAMTS6	protein_coding	-2.08002	5.77691e-08	2.68645	8.08569e-09
349	ENSG00000105974	VAX2	protein_coding	1.8152	3.57482e-11	2.68371	1.83011e-05
350	ENSG00000249751	PCNA	protein_coding	0.335889	0.0313333	2.68	1.59059e-09
351	ENSG00000163297	NTN1	protein_coding	4.43422	1.25681e-05	2.67904	7.628e-12
352	ENSG00000166710	CAV1	protein_coding	-6.3859	1.14258e-06	2.67759	4.64166e-13
353	ENSG00000138413	LFNG	protein_coding	-0.610299	0.00482722	2.67746	3.77172e-18
354	ENSG00000065978	ECSCR	protein_coding	1.00341	0.00541308	2.67613	2.51432e-23
355	ENSG00000133874	B2M	protein_coding	-1.17443	0.0420308	2.66291	4.35794e-10
356	ENSG00000101003	IDH1	protein_coding	1.16224	1.22044e-06	2.66212	1.42365e-10
357	ENSG00000131981	YBX1	protein_coding	0.53005	0.00106167	2.66079	4.88271e-05
358	ENSG00000123609	RNF122	protein_coding	0.608416	0.00783904	2.65548	3.41944e-13
359	ENSG00000171428	GINS1	protein_coding	1.64621	3.4561e-05	2.65375	2.37415e-11
360	ENSG00000154589	TP53I3	protein_coding	-0.442233	4.52365e-07	2.65014	1.63619e-06
361	ENSG00000164056	NMI	protein_coding	-1.68273	0.00428027	2.64982	2.37298e-07
362	ENSG00000140988	LY96	protein_coding	-3.66353	6.27314e-06	2.64289	2.59718e-24
363	ENSG00000175489	RPL39	protein_coding	0.450496	0.0135783	2.63706	6.5138e-08
364	ENSG00000006634	RPS2	protein_coding	1.17134	0.000138711	2.63693	6.08949e-13
365	ENSG00000109861	LRRC25	protein_coding	1.39816	0.0155461	2.63087	2.16656e-08
366	ENSG00000118508	DBF4	protein_coding	1.06028	0.0028657	2.62786	2.59535e-09
367	ENSG00000166801	HS3ST3A1	protein_coding	-1.28643	4.12723e-06	2.62443	2.94263e-14
368	ENSG00000164045	CTSC	protein_coding	1.06035	4.65625e-05	2.62326	1.74224e-07
369	ENSG00000073111	FAM111A	protein_coding	-1.23189	6.63659e-07	2.61738	1.96905e-09
370	ENSG00000165105	CDC25A	protein_coding	1.69146	0.0263076	2.60801	0.00166906
371	ENSG00000166927	SLC7A7	protein_coding	0.0880406	0.000302273	2.60365	4.65648e-07
372	ENSG00000153898	MCM2	protein_coding	1.27854	0.000441884	2.59982	1.65791e-05
373	ENSG00000196924	GATA3	protein_coding	-0.637445	1.9736e-05	2.59255	2.85947e-09
374	ENSG00000158473	MS4A7	protein_coding	1.98804	0.00351197	2.59214	2.82294e-07
375	ENSG00000206503	FLNA	protein_coding	-1.39108	0.00483646	2.58868	8.98705e-11
376	ENSG00000189320	NXT1	protein_coding	0.135311	5.08119e-11	2.58715	0.00480421
377	ENSG00000123610	SOCS2	protein_coding	-0.328345	0.010009	2.5799	5.17931e-05
378	ENSG00000197093	FAM180A	protein_coding	-5.37429	0.0281612	2.57926	1.29131e-15
379	ENSG00000111199	ECM2	protein_coding	-1.11599	0.0215874	2.57897	7.99099e-08
380	ENSG00000185499	TBX2	protein_coding	-0.0929771	0.0107598	2.57881	3.10064e-08
381	ENSG00000144681	TNFAIP6	protein_coding	1.09135	0.00888054	2.57724	0.0043834
382	ENSG00000101384	GAL3ST4	protein_coding	2.07253	0.0156662	2.57604	4.78192e-09
383	ENSG00000173281	TRPV4	protein_coding	1.16015	0.000930348	2.57193	1.63917e-10
384	ENSG00000114115	STAC	protein_coding	-1.17054	1.19311e-05	2.571	5.45771e-05
385	ENSG00000275591	JAG1	protein_coding	-1.13098	0.0236068	2.56968	6.28055e-05
386	ENSG00000135437	PPP1R3B	protein_coding	-1.80942	0.032289	2.56829	1.2506e-07
387	ENSG00000078900	OSMR	protein_coding	0.540061	0.00174158	2.5616	0.000651197
388	ENSG00000079150	FBXO5	protein_coding	-0.10736	0.0182583	2.56111	4.9247e-13
389	ENSG00000104889	PDIA5	protein_coding	0.372887	0.000284195	2.56034	2.31231e-12
390	ENSG00000107438	TP73	protein_coding	1.23237	0.0440053	2.55361	1.32329e-07
391	ENSG00000149554	RNASEH2A	protein_coding	0.699677	0.000721975	2.54875	1.13795e-13
392	ENSG00000123342	PDLIM1	protein_coding	-0.455293	0.0369505	2.54686	0.0012635
393	ENSG00000141753	CP	protein_coding	-0.519718	1.77677e-09	2.54578	1.23961e-08
394	ENSG00000042493	MMP19	protein_coding	0.908122	2.07003e-06	2.54521	9.73661e-10
395	ENSG00000100292	IGFBP4	protein_coding	-1.79016	0.0248513	2.54033	3.54109e-06
396	ENSG00000206450	CAPG	protein_coding	-3.3341	7.10584e-05	2.53592	5.02415e-09
397	ENSG00000119655	HLA-DQB1	protein_coding	0.848635	9.21383e-12	2.53177	6.26064e-10
398	ENSG00000172936	IFI30	protein_coding	-0.401579	4.12403e-06	2.52449	3.51936e-18
399	ENSG00000111602	CASP6	protein_coding	-0.172542	5.71676e-06	2.52239	9.60624e-11
400	ENSG00000081320	STC1	protein_coding	-1.0089	1.05132e-08	2.52181	8.48239e-15
401	ENSG00000172380	TIMELESS	protein_coding	1.15675	0.0202294	2.51518	3.84926e-17
402	ENSG00000105281	GNG12	protein_coding	-0.923296	0.0130824	2.51197	3.14369e-10
403	ENSG00000217555	C1QC	protein_coding	0.387099	0.00470715	2.50264	1.29618e-16
404	ENSG00000152213	CDKN3	protein_coding	-0.0578115	9.88925e-05	2.50197	1.17787e-07
405	ENSG00000166106	CKLF	protein_coding	0.877651	0.012934	2.49763	8.13562e-05
406	ENSG00000180447	ARL11	protein_coding	1.86158	0.00322429	2.49703	5.4292e-05
407	ENSG00000233954	LBX2	protein_coding	-0.323967	0.000143828	2.49211	2.04829e-18
408	ENSG00000132205	ADAMTS15	protein_coding	-1.32521	0.0253746	2.48929	2.36082e-06
409	ENSG00000152240	CD74	protein_coding	1.10504	0.000150306	2.48708	5.78221e-14
410	ENSG00000168393	HAUS1	protein_coding	1.30775	1.92837e-06	2.48253	2.62084e-15
411	ENSG00000127564	PRIM2	protein_coding	0.0256144	0.00349242	2.47448	8.43223e-07
412	ENSG00000101000	FCGRT	protein_coding	-0.584909	2.32223e-06	2.47368	3.01533e-09
413	ENSG00000182963	SYTL4	protein_coding	0.708405	0.000771468	2.46953	6.5479e-14
414	ENSG00000162739	PKMYT1	protein_coding	0.929989	2.21559e-05	2.468	5.18161e-05
415	ENSG00000104081	GJC1	protein_coding	-1.22183	1.46756e-06	2.46056	1.89463e-09
416	ENSG00000130508	SLAMF6	protein_coding	1.61275	3.91776e-05	2.4594	7.88436e-06
417	ENSG00000168487	ZWINT	protein_coding	0.532595	0.0142998	2.45348	4.93518e-12
418	ENSG00000196411	BMF	protein_coding	-3.97623	0.00748698	2.45131	1.89738e-07
419	ENSG00000164104	TPRG1	protein_coding	-0.0508855	1.96396e-06	2.44733	1.96842e-12
420	ENSG00000177697	DHRSX	protein_coding	-0.0945343	5.83841e-06	2.43879	1.31438e-10
421	ENSG00000068001	HMGB2	protein_coding	1.35151	0.00102843	2.43751	7.84494e-21
422	ENSG00000175538	DPYD	protein_coding	-0.137913	0.000246328	2.43736	7.65571e-09
423	ENSG00000109743	C6orf118	protein_coding	0.468227	3.4686e-05	2.4372	2.25997e-09
424	ENSG00000173207	HYAL2	protein_coding	0.90518	0.00448921	2.43671	8.81061e-12
425	ENSG00000104611	KCNE3	protein_coding	1.78634	0.000322807	2.43573	1.29225e-06
426	ENSG00000102174	CKS1B	protein_coding	0.864089	0.0251644	2.43239	7.32317e-10
427	ENSG00000155366	SH2D4A	protein_coding	-2.89459	0.00848305	2.43227	1.96277e-17
428	ENSG00000129038	SDC1	protein_coding	0.23437	0.000158658	2.43124	0.000306983
429	ENSG00000261857	HLA-DRB1	protein_coding	0.730293	0.00202324	2.43	0.00116519
430	ENSG00000147065	PHEX	protein_coding	-1.95077	7.64329e-05	2.42899	1.94239e-12
431	ENSG00000134955	RHOC	protein_coding	-0.675295	0.0379616	2.42878	1.20363e-07
432	ENSG00000197496	LOXL1	protein_coding	-4.41411	0.0107217	2.42841	4.4169e-08
433	ENSG00000120992	MIA	protein_coding	4.53837	0.00101999	2.42783	1.75683e-14
434	ENSG00000188643	SLC2A10	protein_coding	-2.09229	0.00566802	2.41811	1.57615e-07
435	ENSG00000167513	LYPLA1	protein_coding	1.0962	7.86776e-06	2.41773	3.03261e-07
436	ENSG00000100097	MYC	protein_coding	-0.681204	1.62896e-07	2.41531	2.9531e-08
437	ENSG00000118707	S100A16	protein_coding	-2.12212	0.0212434	2.41314	6.53544e-11
438	ENSG00000170006	HELLS	protein_coding	-0.0246532	0.00135997	2.40064	7.4955e-08
439	ENSG00000168899	BTN2A2	protein_coding	-0.469679	0.0454047	2.39891	5.15933e-07
440	ENSG00000145908	PLSCR1	protein_coding	-0.434099	0.00141906	2.39671	4.61176e-07
441	ENSG00000132109	TMEM154	protein_coding	-2.2538	1.67321e-05	2.39658	5.23567e-14
442	ENSG00000006468	VAMP5	protein_coding	-1.77226	7.27689e-08	2.39435	1.64606e-07
443	ENSG00000143977	IL7	protein_coding	-0.469211	9.50656e-07	2.3935	2.46794e-13
444	ENSG00000075420	TRIM21	protein_coding	-2.1819	0.00160124	2.39316	2.15747e-11
445	ENSG00000128165	SNRPG	protein_coding	0.934057	0.0259018	2.39251	0.000857799
446	ENSG00000164543	IL1RAP	protein_coding	0.00458866	0.000144479	2.3884	9.68213e-10
447	ENSG00000094804	FNDC3B	protein_coding	-0.778903	0.000263782	2.38579	3.84517e-08
448	ENSG00000101608	ADM2	protein_coding	1.04192	0.0120935	2.37996	1.68859e-11
449	ENSG00000205413	STK17A	protein_coding	-1.65102	4.99871e-10	2.37976	9.57775e-07
450	ENSG00000122786	MYL12A	protein_coding	-2.71266	4.50931e-05	2.37403	7.37341e-13
451	ENSG00000213347	SAMD9	protein_coding	-5.63108	0.0070287	2.37163	7.18039e-07
452	ENSG00000101104	GINS4	protein_coding	0.562668	0.000338126	2.36839	2.14627e-05
453	ENSG00000112769	CALD1	protein_coding	-2.92715	0.000539316	2.36664	2.22583e-07
454	ENSG00000129226	MXD3	protein_coding	0.644412	1.49945e-05	2.36553	1.25134e-07
455	ENSG00000123892	XRCC2	protein_coding	0.548899	0.000384684	2.36531	8.35929e-06
456	ENSG00000213949	PABPC1L	protein_coding	1.26648	0.000319712	2.36508	9.10701e-09
457	ENSG00000136048	ITGA1	protein_coding	-3.07712	0.002424	2.35452	2.27179e-10
458	ENSG00000110852	AGBL2	protein_coding	0.54488	0.02417	2.35437	5.27265e-05
459	ENSG00000197565	PABPC4L	protein_coding	-0.394604	0.0417425	2.35436	0.00153213
460	ENSG00000163879	DRAM1	protein_coding	-1.27348	0.0178911	2.35365	3.91562e-08
461	ENSG00000167613	DNALI1	protein_coding	0.955626	0.000235782	2.34716	1.453e-06
462	ENSG00000172123	IGF2BP1	protein_coding	0.135907	0.00564091	2.34522	1.15575e-07
463	ENSG00000163565	SLFN12	protein_coding	-1.2852	0.00423962	2.33793	1.60335e-08
464	ENSG00000105877	PCDHB9	protein_coding	0.219716	0.000533553	2.33465	0.000372117
465	ENSG00000173040	LAG3	protein_coding	0.306798	0.010848	2.33419	5.58353e-05
466	ENSG00000166825	DIAPH3	protein_coding	-0.688431	0.0212294	2.33038	0.000227145
467	ENSG00000162614	DNAH11	protein_coding	1.73121	3.43377e-08	2.32777	1.19123e-07
468	ENSG00000154553	EVC2	protein_coding	-1.88731	3.7524e-05	2.32753	6.58944e-07
469	ENSG00000164109	NEXN	protein_coding	-4.36952	0.000257301	2.32623	1.07874e-07
470	ENSG00000214114	PDLIM3	protein_coding	1.99036	0.0123871	2.32541	3.66635e-17
471	ENSG00000168394	APOBEC3G	protein_coding	-0.676521	0.0193987	2.32461	4.19361e-08
472	ENSG00000049249	OAS1	protein_coding	-0.928175	0.0166835	2.32305	0.000100042
473	ENSG00000154080	MYCBP	protein_coding	-0.480869	0.0445539	2.31995	0.0053054
474	ENSG00000100297	TNFRSF9	protein_coding	0.938969	1.77064e-05	2.31259	7.2699e-13
475	ENSG00000150687	TES	protein_coding	0.387929	2.96951e-06	2.31139	8.20174e-07
476	ENSG00000131351	CHST9	protein_coding	0.919737	0.00246919	2.30982	9.70452e-14
477	ENSG00000221869	GSX2	protein_coding	0.461533	0.0135174	2.30967	3.94588e-07
478	ENSG00000128595	PRSS23	protein_coding	-4.13091	0.000416433	2.30872	2.6855e-11
479	ENSG00000025708	CEBPD	protein_coding	-1.32578	0.000274281	2.30572	2.3986e-06
480	ENSG00000106278	CALU	protein_coding	-1.69459	6.3786e-14	2.3041	2.44306e-05
481	ENSG00000183671	PLA2G5	protein_coding	-0.920566	0.00431578	2.30101	0.00779094
482	ENSG00000138829	PTPRZ1	protein_coding	7.69062	0.0438231	2.29912	0.0196509
483	ENSG00000067066	OSTC	protein_coding	-0.336016	8.44785e-08	2.29906	2.16568e-08
484	ENSG00000142698	STAB1	protein_coding	0.295034	0.00193355	2.29861	0.000175365
485	ENSG00000185404	SP100	protein_coding	-3.22324	0.0158611	2.29472	1.54971e-07
486	ENSG00000113732	C1orf94	protein_coding	2.86014	0.00137759	2.29387	8.60066e-17
487	ENSG00000087077	APOBEC3D	protein_coding	0.318501	0.00423283	2.29227	1.09191e-10
488	ENSG00000168028	SP140L	protein_coding	-1.93553	0.0129061	2.29163	3.16299e-12
489	ENSG00000134419	CD36	protein_coding	-1.16742	0.00513359	2.28504	3.56965e-12
490	ENSG00000204252	TRIP6	protein_coding	-2.75178	0.00215641	2.28424	8.12024e-06
491	ENSG00000147872	HLA-DOA	protein_coding	0.951491	0.000224826	2.28002	2.73111e-05
492	ENSG00000155368	SNX20	protein_coding	0.766881	9.00149e-09	2.27599	2.14554e-08
493	ENSG00000271503	PLTP	protein_coding	-0.389494	2.07532e-05	2.27355	5.08522e-05
494	ENSG00000175567	PLIN2	protein_coding	-2.3874	0.000328388	2.27351	8.22311e-08
495	ENSG00000100196	ACP5	protein_coding	0.721247	0.00720802	2.26416	0.000213871
496	ENSG00000107796	CCL5	protein_coding	1.47023	3.58199e-05	2.26321	1.16554e-05
497	ENSG00000182326	UCP2	protein_coding	2.8441	0.000199448	2.26205	0.000147147
498	ENSG00000163359	ACTA2	protein_coding	-3.54559	1.48184e-08	2.26011	0.026018
499	ENSG00000138823	C1S	protein_coding	-4.54412	0.00318377	2.26003	0.00267736
500	ENSG00000114200	PRF1	protein_coding	0.549738	9.1271e-06	2.25922	2.90788e-05
501	ENSG00000187116	MTTP	protein_coding	1.71347	0.000141117	2.25796	0.00109342
502	ENSG00000188610	RPS4Y1	protein_coding	-0.150577	0.000340821	2.25651	7.9194e-10
503	ENSG00000122862	BCHE	protein_coding	3.61419	0.00199004	2.2556	1.12308e-05
504	ENSG00000180801	MASP1	protein_coding	1.21658	1.13385e-06	2.25494	0.000947765
505	ENSG00000204525	LILRA5	protein_coding	1.54204	0.000231075	2.25259	8.20532e-08
506	ENSG00000125733	FAM72B	protein_coding	1.41082	2.51114e-05	2.25118	4.42537e-16
507	ENSG00000122694	SRGN	protein_coding	-5.55167	0.0263537	2.25074	2.00078e-10
508	ENSG00000131668	ARSJ	protein_coding	-3.54729	0.00481532	2.24815	0.0130857
509	ENSG00000136634	GLIPR2	protein_coding	0.692249	0.00466111	2.24134	0.000610475
510	ENSG00000114251	BARX1	protein_coding	3.53152	6.22206e-06	2.23991	1.04522e-07
511	ENSG00000163638	SUSD2	protein_coding	-1.59141	0.00445096	2.23928	9.67687e-06
512	ENSG00000011304	MMP1	protein_coding	-1.26432	5.21672e-05	2.23859	8.7251e-18
513	ENSG00000162511	IL10	protein_coding	1.38942	0.000751213	2.23837	1.16925e-06
514	ENSG00000111665	WNT5A	protein_coding	-3.88432	0.00101873	2.2376	1.25612e-08
515	ENSG00000177119	PTBP1	protein_coding	0.550586	0.000369667	2.23283	3.94237e-14
516	ENSG00000215784	LAPTM5	protein_coding	1.30116	0.000365698	2.23179	1.65599e-09
517	ENSG00000169495	CDCA3	protein_coding	0.917701	0.00104283	2.22984	0.00031136
518	ENSG00000083845	ANO6	protein_coding	1.6444	0.0351919	2.22808	6.39133e-09
519	ENSG00000204577	FAM72D	protein_coding	1.45429	0.00449993	2.22497	1.97983e-05
520	ENSG00000172638	LILRB3	protein_coding	0.951436	0.00264817	2.22112	2.65789e-07
521	ENSG00000163840	IL13RA2	protein_coding	-1.33221	0.00329176	2.21702	1.01926e-09
522	ENSG00000177409	EFEMP2	protein_coding	-3.06862	1.5898e-06	2.21591	1.73207e-05
523	ENSG00000091136	PSPH	protein_coding	0.563664	0.00349213	2.21549	0.000111713
524	ENSG00000175544	SAMD9L	protein_coding	-4.15699	0.000274905	2.21331	3.92759e-07
525	ENSG00000181481	LAMB1	protein_coding	-0.751659	1.77136e-05	2.21176	1.66864e-12
526	ENSG00000069869	APOBEC3F	protein_coding	0.106153	0.0425672	2.21043	7.75574e-15
527	ENSG00000105372	CYBA	protein_coding	-1.83425	0.00949993	2.20893	1.13561e-11
528	ENSG00000170801	RPS19	protein_coding	0.424996	0.00131645	2.20469	6.15985e-05
529	ENSG00000164647	APOC2	protein_coding	1.47805	0.0229462	2.20178	0.00242693
530	ENSG00000213420	HTRA3	protein_coding	-3.0039	0.0124522	2.20064	0.00155002
531	ENSG00000167858	PABPC3	protein_coding	0.385178	0.00500228	2.19973	0.019718
532	ENSG00000146670	TEKT1	protein_coding	-1.0209	0.00134581	2.19564	2.51002e-06
533	ENSG00000197905	RAD54L	protein_coding	0.326632	0.0122988	2.19167	2.32238e-06
534	ENSG00000142156	CDCA5	protein_coding	0.490578	3.52351e-13	2.19166	0.000164407
535	ENSG00000114480	C1QTNF6	protein_coding	-0.0946575	2.06712e-05	2.19044	6.01533e-12
536	ENSG00000137757	ZNF93	protein_coding	0.404821	0.00539557	2.19017	5.10792e-06
537	ENSG00000165029	CASP5	protein_coding	-1.20342	0.0076832	2.18254	9.34365e-08
538	ENSG00000102048	FIBIN	protein_coding	0.849533	0.0286627	2.17701	2.06861e-06
539	ENSG00000071539	ABCA1	protein_coding	-2.28963	0.00686453	2.17565	1.07349e-07
540	ENSG00000213145	NXT2	protein_coding	-0.726969	0.00709811	2.17416	3.13774e-07
541	ENSG00000103202	TRIP13	protein_coding	1.05485	0.00104847	2.17065	1.37512e-20
542	ENSG00000144791	HLA-DRB5	protein_coding	0.825838	0.0311068	2.17057	8.69378e-11
543	ENSG00000227074	MND1	protein_coding	0.491843	3.94043e-07	2.16889	1.53468e-05
544	ENSG00000068079	NME4	protein_coding	0.949721	1.71575e-05	2.16804	4.63761e-07
545	ENSG00000007866	LIMD1	protein_coding	1.04412	0.017061	2.16702	5.63741e-07
546	ENSG00000111145	SAPCD1	protein_coding	2.22697	3.28683e-08	2.16232	6.72731e-12
547	ENSG00000150893	ELK3	protein_coding	-2.24417	6.11137e-14	2.15773	0.00153133
548	ENSG00000151617	NUP37	protein_coding	0.26539	6.47175e-08	2.15748	1.07698e-06
549	ENSG00000182492	RTP4	protein_coding	-1.47702	2.80513e-06	2.15683	1.09094e-06
550	ENSG00000157191	STIL	protein_coding	0.0595515	0.00325474	2.15428	8.3596e-21
551	ENSG00000166508	BGN	protein_coding	-4.60683	3.16366e-05	2.15407	4.01707e-08
552	ENSG00000183798	SPON2	protein_coding	-1.78682	2.97126e-05	2.15351	0.0156315
553	ENSG00000137101	CMTM6	protein_coding	-0.0848625	0.00131224	2.15318	1.20259e-05
554	ENSG00000111801	MCM7	protein_coding	1.06936	0.000265906	2.15249	2.53308e-10
555	ENSG00000187678	EMILIN3	protein_coding	2.81103	0.00902828	2.15156	0.000317657
556	ENSG00000115758	ERAP2	protein_coding	-1.60335	1.41509e-08	2.14684	5.11842e-10
557	ENSG00000180340	CD72	protein_coding	-1.34437	5.62234e-07	2.14629	6.44226e-08
558	ENSG00000064666	SPRY4	protein_coding	1.63508	0.000200532	2.14334	8.44841e-05
559	ENSG00000140262	ODC1	protein_coding	1.57457	0.00446576	2.14261	1.55521e-09
560	ENSG00000167914	FZD2	protein_coding	-2.19854	0.00988465	2.14227	0.0128403
561	ENSG00000129116	IL10RB	protein_coding	-0.501424	1.63463e-11	2.14186	6.4215e-13
562	ENSG00000132274	CNN2	protein_coding	-2.64156	2.9572e-06	2.14136	4.7838e-06
563	ENSG00000138587	GSDMA	protein_coding	0.882793	0.000267541	2.13629	1.11462e-06
564	ENSG00000158169	PALLD	protein_coding	-3.01546	0.00646861	2.1356	1.16728e-09
565	ENSG00000155254	GYPC	protein_coding	0.163787	0.00554036	2.13165	1.45452e-08
566	ENSG00000133639	NDUFA4L2	protein_coding	-0.574398	0.0144191	2.12978	3.44626e-21
567	ENSG00000089327	FAM20A	protein_coding	-0.286415	0.000111825	2.12762	3.84969e-08
568	ENSG00000100439	DZIP1L	protein_coding	0.443463	0.000168841	2.12594	1.26297e-13
569	ENSG00000181938	TNFRSF10B	protein_coding	0.167751	0.000484752	2.12462	6.16962e-11
570	ENSG00000139178	ZYX	protein_coding	-0.611527	0.0445644	2.11947	7.47008e-06
571	ENSG00000104518	CDK6	protein_coding	0.779133	0.0492586	2.11681	4.43909e-06
572	ENSG00000019549	PRC1	protein_coding	0.0614122	2.51687e-06	2.11323	0.0003239
573	ENSG00000146112	ROMO1	protein_coding	0.0420017	6.00844e-06	2.11034	9.64845e-17
574	ENSG00000125148	SNAI2	protein_coding	-3.06908	0.00188535	2.10684	6.72492e-05
575	ENSG00000138119	TNFAIP8	protein_coding	-1.29461	1.87787e-12	2.10198	2.18309e-06
576	ENSG00000184445	MT2A	protein_coding	-1.28168	0.000158766	2.09925	6.20348e-08
577	ENSG00000123136	CENPL	protein_coding	0.0730591	2.70879e-05	2.09879	3.91945e-15
578	ENSG00000188501	LRRC46	protein_coding	0.522027	0.0427519	2.09483	1.02709e-05
579	ENSG00000090932	SLFN13	protein_coding	0.409703	0.00210855	2.09452	0.0339526
580	ENSG00000136982	TMEM106C	protein_coding	0.30516	0.0253347	2.0938	4.89246e-14
581	ENSG00000213996	REEP4	protein_coding	0.0230621	0.00192979	2.0924	1.06029e-05
582	ENSG00000179241	DSCC1	protein_coding	1.11574	4.38551e-05	2.08815	3.01375e-11
583	ENSG00000171863	TM6SF2	protein_coding	1.622	0.00066948	2.08806	1.43809e-09
584	ENSG00000146376	HMG20B	protein_coding	0.0309378	4.34463e-06	2.08714	1.76182e-08
585	ENSG00000076604	LDLRAD3	protein_coding	2.92762	4.2247e-12	2.08375	4.52742e-06
586	ENSG00000177674	C1orf112	protein_coding	0.153162	0.000376303	2.08205	1.45335e-12
587	ENSG00000010704	LAMB2	protein_coding	-0.302309	0.000510131	2.07846	2.86031e-06
588	ENSG00000169504	PRCP	protein_coding	0.553468	0.000906837	2.07374	2.49687e-11
589	ENSG00000164434	RPS18	protein_coding	0.198282	2.45192e-07	2.07336	0.00384473
590	ENSG00000026103	HFE	protein_coding	-2.8586	0.000735287	2.07278	1.4485e-05
591	ENSG00000181449	SP6	protein_coding	-0.956562	3.23789e-11	2.07243	1.17003e-06
592	ENSG00000182612	CLIC4	protein_coding	-1.21685	0.00180086	2.07235	2.00716e-09
593	ENSG00000163479	FAS	protein_coding	-3.27155	0.0423146	2.07129	2.16464e-14
594	ENSG00000162244	TCF7L1	protein_coding	0.704684	0.0110702	2.07006	1.78822e-13
595	ENSG00000156802	SSR2	protein_coding	0.57457	0.00673302	2.06992	1.36451e-08
596	ENSG00000038427	RPL29	protein_coding	0.697546	0.00128014	2.0637	4.35209e-08
597	ENSG00000153071	ATAD2	protein_coding	0.670989	1.83158e-11	2.06368	1.31559e-06
598	ENSG00000164136	HILPDA	protein_coding	0.197904	9.52894e-08	2.06161	7.48646e-05
599	ENSG00000197299	NBPF14	protein_coding	0.252846	0.000374047	2.05822	2.39725e-06
600	ENSG00000164342	BLM	protein_coding	0.923345	0.000475284	2.0552	6.84505e-07
601	ENSG00000254415	CASZ1	protein_coding	0.507249	0.0262164	2.04984	0.00309598
602	ENSG00000105672	CLEC18A	protein_coding	-0.548702	0.0372926	2.0491	4.95092e-08
603	ENSG00000116774	RBL1	protein_coding	0.442229	0.00138863	2.04573	4.54826e-08
604	ENSG00000026950	ETV2	protein_coding	-1.18063	0.00258979	2.0426	5.04432e-12
605	ENSG00000141526	OLFML3	protein_coding	-3.48719	0.00445155	2.0426	5.50841e-05
606	ENSG00000148926	METTL1	protein_coding	0.274383	3.64482e-08	2.04196	0.00376121
607	ENSG00000071564	BTN3A1	protein_coding	-1.57622	0.00473912	2.03955	4.12109e-09
608	ENSG00000153250	SLC16A3	protein_coding	-3.08488	0.00783623	2.03879	4.24954e-10
609	ENSG00000196209	SLC39A1	protein_coding	0.202006	0.000331401	2.03798	9.26652e-05
610	ENSG00000144843	TCF3	protein_coding	0.811474	0.00923083	2.03743	2.9976e-11
611	ENSG00000169604	RBMS1	protein_coding	-1.13226	0.0264135	2.03535	1.53238e-10
612	ENSG00000185585	TRIM47	protein_coding	0.217512	0.0320629	2.03156	2.69604e-06
613	ENSG00000099377	ZMYND10	protein_coding	-0.789117	1.54242e-06	2.03134	1.30848e-07
614	ENSG00000049449	OLFML2A	protein_coding	-1.31798	0.0163012	2.02731	4.49413e-13
615	ENSG00000069399	MAN2B1	protein_coding	-0.0444487	0.0370694	2.0254	1.98314e-05
616	ENSG00000168994	HSD3B7	protein_coding	-2.72499	0.000956687	2.02365	5.27435e-11
617	ENSG00000198937	PLK4	protein_coding	0.45428	5.29079e-05	2.02294	4.71328e-08
618	ENSG00000111859	RCN1	protein_coding	-0.766461	0.00313549	2.02275	3.00627e-07
619	ENSG00000067182	BCL3	protein_coding	-0.889133	0.00378561	2.02121	3.91577e-10
620	ENSG00000187942	PXDC1	protein_coding	-1.20401	0.025993	2.02074	4.00109e-05
621	ENSG00000204516	CCDC167	protein_coding	0.961953	0.0154964	2.02055	4.63329e-06
622	ENSG00000081059	TNFRSF1A	protein_coding	-1.10726	0.000397633	2.01593	7.80196e-08
623	ENSG00000126246	LSM2	protein_coding	0.632664	0.000701332	2.00657	7.99009e-09
624	ENSG00000197256	DPP4	protein_coding	-0.111991	0.0038005	2.00341	2.58637e-08
625	ENSG00000136859	IGFLR1	protein_coding	1.03774	0.0262673	2.00199	1.26557e-06
626	ENSG00000106397	PPP4C	protein_coding	0.244382	0.0230465	1.99681	1.18399e-09
627	ENSG00000118513	DERA	protein_coding	0.120236	0.0236666	1.9951	0.00110982
628	ENSG00000228716	KDELR2	protein_coding	-0.36557	0.000100546	1.99316	5.01863e-09
629	ENSG00000149591	PLOD3	protein_coding	0.691879	7.46766e-10	1.99287	0.000467775
630	ENSG00000175592	DHFR	protein_coding	0.686261	7.85842e-06	1.99117	0.00100438
631	ENSG00000176046	TAGLN	protein_coding	-4.16558	0.00118016	1.99106	1.18819e-06
632	ENSG00000144485	CTNNAL1	protein_coding	-0.0420248	4.87205e-08	1.99057	0.00262319
633	ENSG00000113657	NUPR1	protein_coding	-2.5414	2.46944e-06	1.98925	1.71739e-08
634	ENSG00000005243	RND2	protein_coding	0.571912	0.000843322	1.98633	6.94699e-05
635	ENSG00000146094	RPS14	protein_coding	0.150135	0.000707278	1.97758	3.9396e-07
636	ENSG00000179761	LSP1	protein_coding	-0.371273	0.00144302	1.97658	0.000952437
637	ENSG00000189184	POU4F1	protein_coding	-0.88486	3.24405e-07	1.97458	1.81584e-06
638	ENSG00000088298	MSX1	protein_coding	0.340971	0.000101201	1.97136	2.44283e-15
639	ENSG00000164687	BOC	protein_coding	0.283284	0.000140287	1.97102	0.00649026
640	ENSG00000139352	FABP5	protein_coding	-3.97537	1.10242e-09	1.96457	0.0143093
641	ENSG00000186395	RPL22L1	protein_coding	-0.139344	1.8744e-05	1.95841	9.74037e-13
642	ENSG00000130755	PDLIM7	protein_coding	0.378844	0.0387568	1.95839	2.8119e-06
643	ENSG00000116670	CCDC15	protein_coding	0.837957	0.0125201	1.95747	1.75949e-09
644	ENSG00000162745	KCNE4	protein_coding	0.148431	0.000200558	1.95744	0.00031527
645	ENSG00000006747	KRT10	protein_coding	-0.781795	0.000355795	1.95563	0.0023127
646	ENSG00000131094	ZNF367	protein_coding	-0.0449022	0.0475475	1.94967	0.0103085
647	ENSG00000108479	A2M	protein_coding	2.01853	0.0103967	1.94837	9.03109e-12
648	ENSG00000106355	C1QL1	protein_coding	2.02279	5.53908e-05	1.94684	1.32891e-13
649	ENSG00000168615	ZNRD1	protein_coding	0.342779	0.00149778	1.94526	1.15276e-07
650	ENSG00000011422	CNPY4	protein_coding	-0.393756	9.7541e-07	1.94453	8.21768e-05
651	ENSG00000127314	POLR2J	protein_coding	0.112075	0.000116095	1.9444	7.79137e-12
652	ENSG00000213401	ADAM9	protein_coding	-1.05286	0.00194364	1.94281	6.92556e-05
653	ENSG00000125753	PLAUR	protein_coding	-4.13604	1.75718e-05	1.94165	5.65465e-15
654	ENSG00000162738	MBOAT1	protein_coding	-0.150492	0.0484425	1.93933	1.7741e-06
655	ENSG00000175895	MAGEA12	protein_coding	3.27596	0.0109427	1.93884	3.4008e-16
656	ENSG00000184988	ARHGEF19	protein_coding	0.272424	0.00193094	1.93696	3.62006e-07
657	ENSG00000119333	VANGL2	protein_coding	1.39802	0.0122923	1.9344	1.10816e-08
658	ENSG00000130429	PFN1	protein_coding	-0.354767	0.000105886	1.93371	2.95389e-07
659	ENSG00000198830	WDR34	protein_coding	0.489315	9.09677e-06	1.92904	2.7811e-10
660	ENSG00000197712	ARHGAP15	protein_coding	1.04501	9.30137e-07	1.92846	1.43252e-08
661	ENSG00000170545	ARPC1B	protein_coding	-1.81438	1.06507e-05	1.92827	3.10451e-05
662	ENSG00000140612	FAM114A1	protein_coding	-3.0481	0.0368771	1.92655	7.18027e-18
663	ENSG00000121577	NUAK2	protein_coding	-0.139114	0.0157863	1.92455	9.09296e-12
664	ENSG00000108679	SEC11A	protein_coding	-0.36881	0.00281724	1.92442	3.6597e-07
665	ENSG00000118242	RAB27A	protein_coding	-0.674102	0.0127149	1.92412	0.000154682
666	ENSG00000142856	MATN2	protein_coding	1.36587	0.0370375	1.92297	1.3637e-11
667	ENSG00000102034	MREG	protein_coding	0.659467	0.00773722	1.92211	3.2268e-06
668	ENSG00000172201	FERMT3	protein_coding	-0.0897627	0.00183515	1.91781	8.76752e-05
669	ENSG00000265972	ITGB3BP	protein_coding	0.668001	0.000230929	1.91769	1.55339e-08
670	ENSG00000115461	MDFIC	protein_coding	0.562778	1.78005e-05	1.9154	0.00040671
671	ENSG00000057252	ELF4	protein_coding	-2.42937	0.000613856	1.91498	4.39257e-17
672	ENSG00000067167	SOAT1	protein_coding	-0.888156	0.000140969	1.91258	4.71569e-14
673	ENSG00000198796	SIX3	protein_coding	0.309268	1.22894e-05	1.91196	0.0332242
674	ENSG00000122026	PSTPIP2	protein_coding	-0.0194681	0.0144341	1.91145	1.39745e-09
675	ENSG00000119403	TRAM1	protein_coding	-1.26243	0.000199163	1.9104	2.62561e-07
676	ENSG00000150779	ALPK2	protein_coding	-4.51573	6.90438e-06	1.9084	3.41969e-09
677	ENSG00000030066	PYCR1	protein_coding	0.126016	1.87122e-05	1.90796	1.95949e-16
678	ENSG00000160691	RPL21	protein_coding	0.960639	0.000253253	1.90632	3.61606e-06
679	ENSG00000137460	PHF19	protein_coding	1.24251	0.0113975	1.90569	4.51457e-05
680	ENSG00000137965	TIMM8B	protein_coding	1.20989	0.00770316	1.90504	6.59145e-06
681	ENSG00000105894	NUP160	protein_coding	0.770734	0.00101727	1.90476	5.15508e-05
682	ENSG00000049541	SHC1	protein_coding	-1.96343	2.83377e-06	1.90448	8.35884e-13
683	ENSG00000134363	FHDC1	protein_coding	1.75382	3.47892e-07	1.9031	0.0169493
684	ENSG00000145050	PTN	protein_coding	2.6225	0.00403528	1.90232	2.28428e-13
685	ENSG00000145431	POU3F4	protein_coding	0.401256	0.000685276	1.90032	6.44192e-07
686	ENSG00000112096	CROT	protein_coding	-0.49185	0.000376654	1.89877	0.00198108
687	ENSG00000106268	RPS3	protein_coding	0.621351	0.00349105	1.89586	2.30593e-11
688	ENSG00000171812	PDGFC	protein_coding	-1.34475	0.00263418	1.89569	0.000797579
689	ENSG00000134470	SLC35F2	protein_coding	0.359304	1.19108e-09	1.8948	8.28061e-07
690	ENSG00000137563	NUDT1	protein_coding	1.18413	0.0291805	1.89466	1.37336e-08
691	ENSG00000039560	COL8A2	protein_coding	-4.20307	0.0135941	1.89459	6.06789e-08
692	ENSG00000133131	IL15RA	protein_coding	-2.18401	1.60426e-06	1.89414	1.33749e-12
693	ENSG00000112079	RAI14	protein_coding	-1.03597	3.69625e-06	1.89299	2.26466e-14
694	ENSG00000169756	HAVCR2	protein_coding	0.885031	0.00032075	1.8841	3.45665e-12
695	ENSG00000072506	BTG3	protein_coding	-0.144118	0.000613498	1.8833	2.63861e-18
696	ENSG00000169902	LIMS1	protein_coding	-1.29345	0.00926246	1.87839	1.27376e-08
697	ENSG00000105193	MSI1	protein_coding	0.11758	0.00292812	1.87637	5.78122e-09
698	ENSG00000178562	TSPAN11	protein_coding	1.78799	0.00738489	1.87632	0.000865364
699	ENSG00000197958	TPST1	protein_coding	-0.794582	0.000845974	1.87579	2.85763e-12
700	ENSG00000162627	MILR1	protein_coding	-0.691067	0.0161778	1.87573	1.45676e-11
701	ENSG00000153551	RPS16	protein_coding	0.664261	0.0006093	1.8756	2.40138e-06
702	ENSG00000181381	SNX7	protein_coding	-0.984764	2.28334e-05	1.87447	7.52119e-08
703	ENSG00000123353	BORA	protein_coding	0.798575	0.00670291	1.86498	6.43665e-13
704	ENSG00000069493	LCP1	protein_coding	-0.239077	0.0188574	1.86431	1.61361e-08
705	ENSG00000184304	FLT4	protein_coding	1.1027	0.0325366	1.86329	2.18707e-11
706	ENSG00000164761	ORMDL2	protein_coding	0.441715	0.000394321	1.86279	0.0035213
707	ENSG00000088035	PRKD1	protein_coding	-1.14587	0.0314317	1.86016	8.76545e-11
708	ENSG00000030582	SEC61A1	protein_coding	0.0168634	5.06101e-10	1.85949	1.9946e-10
709	ENSG00000126458	ALG6	protein_coding	0.660343	6.54704e-12	1.85762	3.72427e-07
710	ENSG00000180879	RPS29	protein_coding	-0.212652	0.0164889	1.85327	6.81424e-12
711	ENSG00000124762	SSR4	protein_coding	-0.517595	0.0100917	1.84901	0.000157006
712	ENSG00000110057	ECT2	protein_coding	0.00772364	0.0438741	1.84786	1.415e-07
713	ENSG00000101346	ZFP36L2	protein_coding	-0.503605	0.0285168	1.84779	4.52754e-13
714	ENSG00000099250	OASL	protein_coding	-0.394622	0.0007513	1.84681	1.94978e-05
715	ENSG00000160255	CDKN1A	protein_coding	-1.0952	0.000672729	1.84661	5.80981e-05
716	ENSG00000077713	POFUT1	protein_coding	0.992298	0.00300976	1.84632	9.05357e-06
717	ENSG00000165895	CASP2	protein_coding	0.609197	0.000781597	1.84467	1.14808e-08
718	ENSG00000115963	SLC25A43	protein_coding	-1.38352	9.10178e-08	1.84456	5.98022e-05
719	ENSG00000186564	TMEM176A	protein_coding	-1.75527	0.000635369	1.84195	0.00101393
720	ENSG00000197728	PRKD3	protein_coding	-0.229621	0.00650652	1.838	3.03373e-06
721	ENSG00000112118	FOXD2	protein_coding	0.88006	0.0363605	1.83794	3.02455e-09
722	ENSG00000105355	RPL36A	protein_coding	-0.070058	0.000636734	1.83726	1.12401e-09
723	ENSG00000183255	RPS26	protein_coding	0.523828	9.35658e-08	1.83655	8.07988e-19
724	ENSG00000155561	PLIN3	protein_coding	-1.21097	0.0124909	1.83591	4.97477e-14
725	ENSG00000150093	PTTG1IP	protein_coding	-1.7937	1.72958e-07	1.83538	7.67493e-08
726	ENSG00000132122	C2	protein_coding	-1.44678	0.000101875	1.83478	1.20376e-06
727	ENSG00000076662	NUP205	protein_coding	0.613323	0.0452558	1.83033	1.5301e-06
728	ENSG00000183763	ITGB1	protein_coding	-2.26486	0.0017783	1.83009	1.49425e-06
729	ENSG00000181026	ICAM3	protein_coding	-1.29877	0.000385039	1.82048	4.33213e-08
730	ENSG00000142534	PNP	protein_coding	0.0549393	0.0371692	1.81837	9.65043e-09
731	ENSG00000267534	RAB34	protein_coding	-0.268587	2.29442e-06	1.81555	5.56975e-06
732	ENSG00000102158	RPS13	protein_coding	-0.238163	0.00427046	1.81371	2.18045e-11
733	ENSG00000142937	GADD45A	protein_coding	-0.0545088	0.000593236	1.81359	4.74851e-09
734	ENSG00000182004	S1PR2	protein_coding	2.42266	0.00686807	1.8106	1.85434e-05
735	ENSG00000059378	C7orf31	protein_coding	-0.0432902	0.0311269	1.80877	4.03384e-06
736	ENSG00000096060	SNRPE	protein_coding	1.30006	7.70118e-05	1.80845	0.000976769
737	ENSG00000166794	PILRA	protein_coding	-0.431781	0.0398166	1.80701	6.67885e-12
738	ENSG00000012048	ZNF480	protein_coding	-0.0185834	0.0470897	1.8061	1.21901e-07
739	ENSG00000153029	PARP12	protein_coding	-1.02218	0.0121901	1.80393	7.65188e-08
740	ENSG00000196981	PPIB	protein_coding	-0.290506	0.000374042	1.80302	3.01829e-11
741	ENSG00000146833	TMCO4	protein_coding	-1.037	0.00330085	1.80162	3.15479e-10
742	ENSG00000134247	WT1	protein_coding	0.679566	0.019931	1.79765	1.68472e-06
743	ENSG00000122565	HNMT	protein_coding	0.587552	8.62514e-08	1.79462	4.36342e-13
744	ENSG00000205542	RFC4	protein_coding	0.0558266	0.000125743	1.79144	2.67186e-08
745	ENSG00000179772	TMSB4X	protein_coding	-3.20815	0.00905612	1.78899	4.64419e-05
746	ENSG00000112977	KCTD14	protein_coding	-0.010634	0.000507819	1.78872	1.34691e-20
747	ENSG00000177954	FOXS1	protein_coding	-1.91868	0.000642445	1.78336	2.52765e-10
748	ENSG00000177706	RNFT1	protein_coding	0.451801	2.681e-05	1.78034	0.00036922
749	ENSG00000115268	RPS27	protein_coding	1.13461	0.00457071	1.78029	9.15438e-12
750	ENSG00000051620	CENPQ	protein_coding	0.466561	3.66869e-12	1.77935	3.2091e-11
751	ENSG00000049860	RPS15	protein_coding	0.575084	0.000934314	1.77771	1.50902e-09
752	ENSG00000168386	CYBB	protein_coding	0.562594	0.0190303	1.77694	1.90727e-05
753	ENSG00000116478	HAL	protein_coding	0.208584	0.0104063	1.77604	7.01528e-19
754	ENSG00000014914	FILIP1L	protein_coding	-1.64755	4.97403e-07	1.77403	7.68585e-07
755	ENSG00000185088	RPL13A	protein_coding	0.353815	0.00229848	1.77365	1.26102e-07
756	ENSG00000167460	HDAC1	protein_coding	0.463458	2.28714e-09	1.77298	1.03251e-08
757	ENSG00000111328	NLRC5	protein_coding	-1.26095	0.0103027	1.77263	5.4293e-13
758	ENSG00000130332	MTMR11	protein_coding	-2.95661	6.76336e-08	1.77212	1.89377e-08
759	ENSG00000254087	TPM4	protein_coding	-1.79028	0.0127949	1.77085	1.03107e-06
760	ENSG00000136630	CDK2AP1	protein_coding	0.619527	4.45197e-11	1.76838	4.19455e-05
761	ENSG00000113212	LYN	protein_coding	0.984866	0.0239332	1.76714	0.0177446
762	ENSG00000171388	RAB31	protein_coding	-0.534173	0.00427359	1.76698	0.000143179
763	ENSG00000125885	PCDHB7	protein_coding	-2.26752	0.00895953	1.76649	8.51762e-07
764	ENSG00000108828	MCM8	protein_coding	0.464008	0.00110681	1.76278	3.06867e-13
765	ENSG00000164610	NAGA	protein_coding	-0.187588	0.00516095	1.76276	1.04119e-14
766	ENSG00000076003	GPSM3	protein_coding	-0.783604	6.37051e-08	1.76193	6.03086e-09
767	ENSG00000130958	P4HA1	protein_coding	-0.479441	0.000464634	1.76166	9.99821e-12
768	ENSG00000164934	SLC35D2	protein_coding	-1.8819	0.000497241	1.76022	7.87586e-16
769	ENSG00000155629	C7orf61	protein_coding	0.345376	0.0337764	1.76014	0.000174713
770	ENSG00000122483	RPL9	protein_coding	0.295569	0.00508548	1.75933	8.74933e-07
771	ENSG00000178776	DCAF13	protein_coding	1.33511	0.0233531	1.75883	0.0390271
772	ENSG00000175643	TWSG1	protein_coding	-0.27506	0.0092593	1.75715	3.23186e-05
773	ENSG00000142552	CCDC18	protein_coding	1.26726	0.000358461	1.75682	0.000170348
774	ENSG00000196262	C5orf46	protein_coding	-2.83902	0.0175424	1.75657	1.46835e-12
775	ENSG00000167775	RCN3	protein_coding	-2.54239	0.000146957	1.7555	1.06323e-10
776	ENSG00000111335	PPIA	protein_coding	0.380296	0.0269872	1.75476	0.00300154
777	ENSG00000113555	ARHGEF6	protein_coding	-0.895197	0.00453202	1.75416	3.42554e-05
778	ENSG00000168743	CD320	protein_coding	1.17631	0.0088542	1.75297	0.0229352
779	ENSG00000167397	COQ2	protein_coding	0.0309743	0.00116852	1.75166	2.93332e-11
780	ENSG00000164713	NPNT	protein_coding	-2.24412	0.00271921	1.75104	1.76977e-13
781	ENSG00000164305	CEACAM1	protein_coding	0.4372	0.0323838	1.7508	1.65219e-09
782	ENSG00000105939	HK2	protein_coding	0.522729	0.0349737	1.74993	1.2723e-09
783	ENSG00000064300	VKORC1	protein_coding	-0.751313	3.84578e-05	1.74731	0.00384401
784	ENSG00000100644	BRI3	protein_coding	-0.844371	0.00201672	1.74618	7.46017e-08
785	ENSG00000068697	CASP3	protein_coding	-0.579535	0.0031559	1.74365	3.23696e-13
786	ENSG00000118705	HIF1A	protein_coding	-1.33207	0.000902178	1.74096	2.47287e-18
787	ENSG00000138646	LAPTM4A	protein_coding	-0.705056	0.000337963	1.74075	0.000358691
788	ENSG00000125347	CD4	protein_coding	0.298387	3.70239e-07	1.74053	7.55055e-06
789	ENSG00000174600	RPN2	protein_coding	0.315078	0.0476289	1.74042	0.000592273
790	ENSG00000147604	IRF1	protein_coding	-2.97458	2.42372e-05	1.7387	5.53914e-14
791	ENSG00000065308	CMKLR1	protein_coding	-2.31172	8.91229e-07	1.73837	6.67873e-06
792	ENSG00000110719	RPL7	protein_coding	0.648917	0.000515344	1.73693	1.3612e-05
793	ENSG00000214063	TCIRG1	protein_coding	-2.22405	2.46996e-10	1.7325	8.99932e-11
794	ENSG00000224916	LOXL4	protein_coding	0.1703	0.00486436	1.73215	0.00086547
795	ENSG00000154736	PDLIM4	protein_coding	-1.04679	2.51349e-05	1.7319	0.000758856
796	ENSG00000168961	ADAMTS5	protein_coding	-3.79182	0.00561444	1.72766	1.21749e-05
797	ENSG00000127947	ARL6IP6	protein_coding	0.771561	0.000955339	1.72625	4.41737e-12
798	ENSG00000062822	DOK1	protein_coding	-0.113704	0.000523174	1.7233	5.96718e-07
799	ENSG00000204103	C3	protein_coding	-2.61694	0.0481899	1.72326	0.000541238
800	ENSG00000142089	CTPS2	protein_coding	0.550862	0.00244776	1.72004	0.000150899
801	ENSG00000123689	MAFB	protein_coding	-1.70119	0.0180028	1.71856	0.0158965
802	ENSG00000198467	TNIP2	protein_coding	-0.438762	6.8777e-06	1.71717	0.00059108
803	ENSG00000145040	G0S2	protein_coding	-3.18088	0.0100311	1.71648	0.00951019
804	ENSG00000185475	EHD4	protein_coding	-0.147494	0.00518836	1.71574	1.0598e-12
805	ENSG00000155363	DENND2A	protein_coding	-0.296756	0.0139268	1.71363	3.64031e-08
806	ENSG00000132915	UCN2	protein_coding	-1.36113	0.000349498	1.71297	0.00197153
807	ENSG00000164105	TMEM179B	protein_coding	-0.773428	2.42699e-05	1.71255	5.5484e-14
808	ENSG00000119408	MOV10	protein_coding	1.05146	0.0317259	1.71144	8.01437e-06
809	ENSG00000151239	PDE6A	protein_coding	1.34014	0.000627109	1.71087	1.84041e-13
810	ENSG00000106153	SAP30	protein_coding	1.27215	0.000159449	1.70982	0.000605168
811	ENSG00000050344	HPSE	protein_coding	0.647521	0.043685	1.70868	0.000436479
812	ENSG00000103742	TWF1	protein_coding	-0.678079	0.0437471	1.7076	0.000120041
813	ENSG00000121570	CHCHD2	protein_coding	1.02905	0.0015013	1.70661	0.00773529
814	ENSG00000139974	NFE2L3	protein_coding	1.07162	0.0432102	1.70573	4.74601e-11
815	ENSG00000132692	CNTLN	protein_coding	-0.247063	4.19051e-11	1.70495	0.0346669
816	ENSG00000073861	IGDCC4	protein_coding	0.698485	5.17444e-07	1.70378	0.00214009
817	ENSG00000136942	DPPA4	protein_coding	1.38019	8.44488e-07	1.70309	6.14971e-07
818	ENSG00000114978	TBX21	protein_coding	3.71438	0.000705402	1.70083	7.32385e-15
819	ENSG00000265681	RPL35	protein_coding	0.848182	0.000189861	1.69934	2.85023e-08
820	ENSG00000183386	GNG11	protein_coding	-1.71555	5.616e-07	1.69887	4.39512e-11
821	ENSG00000173218	DRAM2	protein_coding	-0.240488	0.017324	1.69861	0.000235314
822	ENSG00000163710	MOB1A	protein_coding	-0.930735	2.71267e-05	1.69781	0.0202005
823	ENSG00000148303	FHL3	protein_coding	-1.5006	0.000365009	1.69617	2.27266e-09
824	ENSG00000150722	PCOLCE2	protein_coding	3.0715	0.0413423	1.69528	0.0128984
825	ENSG00000095015	RPL7A	protein_coding	0.544225	8.86541e-09	1.69471	2.81759e-06
826	ENSG00000185339	EPSTI1	protein_coding	0.0281823	0.0205467	1.69445	2.94287e-08
827	ENSG00000184489	PPP1R1C	protein_coding	-0.858689	0.000843478	1.69399	6.82873e-05
828	ENSG00000122406	MAP3K1	protein_coding	2.94914	0.00119103	1.69334	1.64939e-08
829	ENSG00000182240	TCN2	protein_coding	-1.58142	5.24883e-05	1.69296	0.000133797
830	ENSG00000160219	TANC1	protein_coding	-0.0279894	0.0160461	1.69271	1.05245e-06
831	ENSG00000198242	BACE2	protein_coding	-1.08144	1.88432e-05	1.69241	1.01021e-13
832	ENSG00000185507	CCNJL	protein_coding	-0.0154299	0.000478437	1.69034	2.94003e-05
833	ENSG00000120802	CKAP2	protein_coding	0.0316057	0.0479486	1.68763	1.08852e-07
834	ENSG00000135838	MAPKAPK3	protein_coding	0.503178	0.0233896	1.68542	6.47683e-06
835	ENSG00000088930	IRF7	protein_coding	-1.47623	0.0450385	1.68537	1.02956e-16
836	ENSG00000133112	TMPO	protein_coding	0.377192	0.0189975	1.68438	2.88908e-07
837	ENSG00000242114	NPL	protein_coding	1.04883	3.66315e-06	1.68227	2.77684e-06
838	ENSG00000168256	XRN2	protein_coding	0.382019	0.0127782	1.68207	1.22876e-12
839	ENSG00000024422	SALL3	protein_coding	-0.363388	7.94441e-06	1.68204	0.000145801
840	ENSG00000103995	MTFP1	protein_coding	1.54932	0.0121875	1.67768	6.25945e-06
841	ENSG00000164949	NKIRAS2	protein_coding	0.525759	6.04637e-05	1.67533	0.000233449
842	ENSG00000111817	TSPAN31	protein_coding	0.0981437	1.4327e-06	1.67043	4.50727e-05
843	ENSG00000006534	DHRS3	protein_coding	0.44709	0.000803709	1.66775	2.7633e-05
844	ENSG00000111581	PGLS	protein_coding	-0.16761	1.87468e-05	1.66664	0.000137056
845	ENSG00000177464	ALDH3B1	protein_coding	-1.08282	0.0233536	1.66629	6.77822e-06
846	ENSG00000105329	ZNF561	protein_coding	0.119924	0.0238908	1.66549	1.27572e-06
847	ENSG00000164574	NUP107	protein_coding	0.745206	1.92731e-07	1.66479	4.36905e-07
848	ENSG00000090554	THBS3	protein_coding	-0.452303	0.0104397	1.66418	1.74217e-07
849	ENSG00000139318	GPR4	protein_coding	0.744762	0.00805446	1.66413	0.000111102
850	ENSG00000143578	GALNT10	protein_coding	-2.7115	0.0175661	1.66172	3.64483e-07
851	ENSG00000163482	DUSP6	protein_coding	1.62303	0.00384855	1.65998	4.54938e-07
852	ENSG00000115267	VOPP1	protein_coding	-0.654831	0.00106597	1.65858	0.000143184
853	ENSG00000178150	CREB3L4	protein_coding	0.719325	0.0121731	1.6583	0.000360351
854	ENSG00000070950	BAX	protein_coding	0.0587594	0.0490667	1.65811	1.29081e-08
855	ENSG00000168890	ZNF114	protein_coding	1.35945	0.00263274	1.65643	2.31701e-14
856	ENSG00000129235	RAD18	protein_coding	0.50981	0.00140261	1.65585	9.25837e-09
857	ENSG00000139278	CASP8	protein_coding	0.0241215	8.31088e-09	1.65454	0.000451753
858	ENSG00000205581	TXNDC17	protein_coding	0.406025	0.0231123	1.65366	5.40801e-13
859	ENSG00000101082	GLIPR1	protein_coding	-4.52911	0.0189457	1.65198	0.00011599
860	ENSG00000140575	RIN3	protein_coding	-0.933454	2.64051e-07	1.65057	2.90452e-06
861	ENSG00000075702	BBOX1	protein_coding	0.644371	0.00177146	1.64965	0.00164533
862	ENSG00000179218	SLA2	protein_coding	-0.665517	0.0469949	1.64863	1.09816e-12
863	ENSG00000173193	IQGAP1	protein_coding	-1.34416	0.000229902	1.64505	5.10926e-05
864	ENSG00000103187	WDR62	protein_coding	0.993734	0.00176592	1.64429	3.66518e-09
865	ENSG00000092841	CD37	protein_coding	0.623523	1.39807e-05	1.64417	3.11187e-08
866	ENSG00000204410	CALR	protein_coding	-0.349864	0.00104	1.64312	0.00180723
867	ENSG00000143870	COTL1	protein_coding	0.850885	0.00227889	1.64234	2.88049e-10
868	ENSG00000106399	MYL6	protein_coding	-1.41575	4.34974e-05	1.64103	7.87703e-08
869	ENSG00000198056	GLB1	protein_coding	-0.468959	7.60168e-07	1.63872	1.52215e-07
870	ENSG00000105483	ORAI1	protein_coding	0.0188029	0.0104164	1.63633	3.51243e-14
871	ENSG00000124256	ESAM	protein_coding	0.412708	0.00119915	1.6363	0.0127552
872	ENSG00000101335	PRDM1	protein_coding	0.33633	0.000315099	1.63595	0.00081519
873	ENSG00000171729	CARD8	protein_coding	0.802358	0.000362324	1.63593	1.97231e-08
874	ENSG00000004776	MYL9	protein_coding	-4.85267	9.22011e-07	1.63478	0.00043281
875	ENSG00000174564	BCL7C	protein_coding	0.153494	0.0326078	1.63003	1.07238e-06
876	ENSG00000075234	COL15A1	protein_coding	-0.29558	0.00703717	1.62869	3.36547e-10
877	ENSG00000170421	IL20RB	protein_coding	-1.79712	0.00242418	1.62691	0.00646445
878	ENSG00000071575	SDSL	protein_coding	0.782088	0.000193947	1.62629	0.00057738
879	ENSG00000142627	KRT8	protein_coding	-1.73384	1.1874e-05	1.62612	0.000689626
880	ENSG00000145246	IFI44L	protein_coding	0.188492	3.28852e-07	1.62075	2.89647e-09
881	ENSG00000198960	TRIB2	protein_coding	1.67594	0.00661418	1.61972	7.9852e-14
882	ENSG00000175792	ALG3	protein_coding	-0.208703	1.60055e-11	1.61951	1.66906e-13
883	ENSG00000078098	ARMCX6	protein_coding	-0.784393	6.28985e-10	1.61806	0.014136
884	ENSG00000104899	MT1X	protein_coding	-0.173274	0.0261056	1.61723	0.0369404
885	ENSG00000143479	FAP	protein_coding	-6.24849	0.000133969	1.61666	1.11045e-06
886	ENSG00000156482	RPL27	protein_coding	0.163079	0.00107667	1.61437	1.09946e-11
887	ENSG00000198001	AMH	protein_coding	0.765296	4.27391e-05	1.61407	7.52412e-11
888	ENSG00000112343	RPL30	protein_coding	0.456637	0.000242484	1.61291	4.08966e-05
889	ENSG00000185624	CRYZ	protein_coding	0.123514	0.00710075	1.61145	5.65113e-11
890	ENSG00000204482	COL2A1	protein_coding	-2.27087	0.00862636	1.61064	0.000638005
891	ENSG00000086062	ZNF558	protein_coding	0.199924	0.000331478	1.60871	0.000305729
892	ENSG00000077152	HSPB7	protein_coding	-1.66493	2.78037e-05	1.60682	0.000521374
893	ENSG00000140455	HAT1	protein_coding	0.207559	0.0101886	1.60506	7.80966e-12
894	ENSG00000162733	UBE2T	protein_coding	0.993616	6.36393e-07	1.60219	0.00265661
895	ENSG00000100342	RPL27A	protein_coding	0.875935	0.0365433	1.60217	0.00702002
896	ENSG00000087086	USP3	protein_coding	0.767192	1.31913e-06	1.60151	5.35936e-05
897	ENSG00000108106	PI4K2B	protein_coding	-0.243335	2.35783e-06	1.59755	8.17284e-05
898	ENSG00000180914	JPH2	protein_coding	-0.365462	2.42328e-08	1.59729	0.0173189
899	ENSG00000104408	UBE2S	protein_coding	0.705797	0.000267295	1.59603	2.55879e-10
900	ENSG00000256229	DPM3	protein_coding	0.611605	0.000177196	1.59559	7.72209e-07
901	ENSG00000173546	MGST2	protein_coding	0.105765	0.00220406	1.59495	0.0013434
902	ENSG00000131724	COMMD10	protein_coding	-0.12134	0.00235262	1.59104	9.48257e-06
903	ENSG00000102699	ZNF530	protein_coding	0.722604	0.00252791	1.59011	9.42987e-10
904	ENSG00000182010	CTSZ	protein_coding	0.14206	0.0290377	1.58895	0.00391849
905	ENSG00000143815	ETV6	protein_coding	0.516954	3.19399e-07	1.58696	4.88072e-09
906	ENSG00000176142	DDR1	protein_coding	0.269919	0.0470768	1.58429	6.3389e-10
907	ENSG00000244486	RPS4X	protein_coding	0.270311	0.0050482	1.58206	0.000134049
908	ENSG00000116729	GLYCTK	protein_coding	0.634109	0.0386437	1.58065	2.47571e-07
909	ENSG00000000971	SCARF2	protein_coding	-0.602986	0.000203622	1.57918	0.00472836
910	ENSG00000105755	WLS	protein_coding	-0.586134	0.000381611	1.57834	8.60846e-10
911	ENSG00000235568	CFH	protein_coding	-2.82539	0.000522346	1.57362	0.000396165
912	ENSG00000049323	GPRC5A	protein_coding	-1.03445	1.02496e-05	1.5736	0.00253211
913	ENSG00000140264	ETHE1	protein_coding	-1.34638	0.0366629	1.57331	1.77299e-08
914	ENSG00000163002	ABHD5	protein_coding	0.529038	0.0104207	1.57308	2.31919e-11
915	ENSG00000125835	NFAM1	protein_coding	1.61093	0.00277701	1.57244	9.16088e-08
916	ENSG00000156587	LTBP1	protein_coding	-3.89029	0.0281206	1.57241	2.27398e-09
917	ENSG00000118257	UBE2L6	protein_coding	-1.42236	0.0474663	1.57042	0.0006263
918	ENSG00000092010	TGFBR1	protein_coding	-0.174727	0.0075268	1.57037	5.27973e-08
919	ENSG00000167272	ZNF880	protein_coding	0.24905	0.000366707	1.56671	7.12621e-11
920	ENSG00000124570	NRP2	protein_coding	-1.38016	0.000365213	1.56657	1.36907e-10
921	ENSG00000258818	SERPINB6	protein_coding	-2.79401	1.08085e-07	1.5639	9.99131e-05
922	ENSG00000114988	LRP5	protein_coding	1.32528	0.00294435	1.56267	2.75082e-15
923	ENSG00000164106	CLN5	protein_coding	-0.624531	5.66857e-08	1.56146	0.000374483
924	ENSG00000075643	SCRG1	protein_coding	5.96153	0.0456121	1.5596	0.00989468
925	ENSG00000171700	ENKUR	protein_coding	0.892615	0.00140918	1.55787	1.909e-09
926	ENSG00000064490	LAP3	protein_coding	-0.314774	2.98466e-06	1.55786	3.90118e-13
927	ENSG00000172167	C1orf53	protein_coding	-0.0109022	0.0391624	1.5545	4.3418e-05
928	ENSG00000076382	DHRS4L2	protein_coding	-0.517278	5.4743e-05	1.55291	0.000532055
929	ENSG00000170892	CD302	protein_coding	0.0680894	3.62026e-05	1.54885	1.56622e-14
930	ENSG00000104915	SPAG5	protein_coding	1.26505	0.023319	1.5477	9.29316e-14
931	ENSG00000266338	CAPN5	protein_coding	-0.09482	0.0201422	1.54648	1.05032e-06
932	ENSG00000169223	GGT5	protein_coding	-1.1014	0.000138544	1.54496	1.89526e-13
933	ENSG00000126264	NBPF15	protein_coding	-0.443404	0.0200835	1.54454	0.000665396
934	ENSG00000160654	RNPEP	protein_coding	0.175717	0.00139941	1.54369	0.00939295
935	ENSG00000184058	LMAN2	protein_coding	-0.572355	0.0102713	1.54287	0.0373263
936	ENSG00000114450	HCST	protein_coding	-1.17958	0.00134305	1.54218	3.45866e-08
937	ENSG00000126709	TBX1	protein_coding	1.22542	0.00430916	1.54116	0.0132784
938	ENSG00000149636	FGL2	protein_coding	-1.57605	0.0188166	1.53933	8.49866e-07
939	ENSG00000008282	ZFAND6	protein_coding	-0.161045	0.000271884	1.53865	3.06546e-07
940	ENSG00000140937	C2orf66	protein_coding	-0.56395	1.01985e-05	1.53604	8.07031e-06
941	ENSG00000182899	STX11	protein_coding	0.213442	0.0294174	1.53327	8.82149e-08
942	ENSG00000119681	TMEM140	protein_coding	-0.438295	4.34965e-13	1.53062	0.0061011
943	ENSG00000184162	RPL35A	protein_coding	0.544857	0.000230237	1.52964	1.10993e-08
944	ENSG00000068784	LTBP2	protein_coding	-5.5712	0.000451926	1.52885	7.56199e-15
945	ENSG00000001036	SRBD1	protein_coding	1.14706	0.0077147	1.52683	4.65986e-08
946	ENSG00000233927	SNAPIN	protein_coding	0.431328	0.00275765	1.52648	3.33028e-10
947	ENSG00000166484	FUCA2	protein_coding	-0.779002	0.00149492	1.52647	3.34505e-10
948	ENSG00000204219	TMEM216	protein_coding	-1.16283	0.0114325	1.52553	0.0097525
949	ENSG00000118855	HKDC1	protein_coding	0.814817	1.78946e-06	1.525	8.48998e-10
950	ENSG00000172172	RPS28	protein_coding	0.717821	3.67505e-05	1.52395	4.27932e-08
951	ENSG00000164117	MAPK7	protein_coding	-2.57514	7.3609e-06	1.5239	5.02341e-13
952	ENSG00000161653	TCEA3	protein_coding	-1.98841	9.12505e-06	1.52239	1.19023e-07
953	ENSG00000105612	MFSD1	protein_coding	-1.20563	0.0340472	1.52224	3.57001e-11
954	ENSG00000060688	MRPL13	protein_coding	0.857279	0.00285396	1.52193	1.2256e-11
955	ENSG00000128050	FBXO8	protein_coding	-2.32706	8.11928e-05	1.52161	1.82943e-07
956	ENSG00000131269	NAGS	protein_coding	-2.14706	0.0466548	1.52151	2.65277e-15
957	ENSG00000162889	ABCB7	protein_coding	0.341806	0.000198577	1.51968	3.29486e-14
958	ENSG00000198074	PSMC3IP	protein_coding	0.0317983	4.73331e-05	1.51924	0.0358643
959	ENSG00000091651	RPL41	protein_coding	0.330598	0.00344348	1.51908	0.000407828
960	ENSG00000165025	NAIP	protein_coding	0.33035	0.00268231	1.51906	0.000293443
961	ENSG00000101986	ORC6	protein_coding	0.805101	0.000533193	1.51836	1.26347e-07
962	ENSG00000172164	PON2	protein_coding	0.358252	0.00747849	1.51498	1.10684e-06
963	ENSG00000143947	ABHD14B	protein_coding	0.20903	0.00629813	1.51412	1.37126e-08
964	ENSG00000137628	VPS25	protein_coding	0.223969	9.19159e-06	1.51294	7.47147e-05
965	ENSG00000117543	CFD	protein_coding	0.499749	0.000585345	1.51291	1.79542e-11
966	ENSG00000168887	SNTB1	protein_coding	1.51595	0.00560991	1.51227	2.47579e-12
967	ENSG00000168374	RPS27A	protein_coding	0.41917	0.0217913	1.51181	2.58726e-11
968	ENSG00000145365	DDX60	protein_coding	-2.75067	0.000313786	1.51142	0.000463348
969	ENSG00000132819	DPH5	protein_coding	1.03225	3.91024e-07	1.51012	1.36318e-07
970	ENSG00000169241	C2orf68	protein_coding	0.773906	0.0432439	1.50988	2.59928e-08
971	ENSG00000174705	SLC50A1	protein_coding	-0.973056	0.00864981	1.50925	8.77971e-05
972	ENSG00000128228	NAGLU	protein_coding	0.649744	0.0360478	1.5071	2.04495e-07
973	ENSG00000205208	CXorf21	protein_coding	0.838984	0.00037862	1.50632	4.00992e-08
974	ENSG00000123179	UBTD2	protein_coding	0.253473	0.00179745	1.50527	5.61085e-09
975	ENSG00000084093	ZSWIM4	protein_coding	-0.872558	0.00611436	1.50373	8.45292e-10
976	ENSG00000159131	REST	protein_coding	-0.825638	0.00620319	1.50204	2.80094e-15
977	ENSG00000174547	CCZ1	protein_coding	-0.169347	0.00219746	1.50123	2.33591e-09
978	ENSG00000161640	GTF2IRD2B	protein_coding	-0.165412	0.00117705	1.50065	0.00390098
979	ENSG00000110063	MRPL11	protein_coding	0.662924	0.000932114	1.49948	2.1223e-12
980	ENSG00000196196	DDOST	protein_coding	0.28953	0.0044178	1.4994	0.00125293
981	ENSG00000091732	DCPS	protein_coding	1.20166	0.00507339	1.49818	8.29886e-10
982	ENSG00000004700	HRCT1	protein_coding	-2.48825	0.000652337	1.49801	9.81598e-08
983	ENSG00000213626	RECQL	protein_coding	-1.31583	3.6566e-08	1.49249	9.82787e-05
984	ENSG00000103260	CC2D2A	protein_coding	0.19231	1.33265e-10	1.48711	0.000377567
985	ENSG00000133818	RARRES2	protein_coding	-2.12673	5.23542e-06	1.4869	1.68393e-07
986	ENSG00000175938	PROM1	protein_coding	1.57452	0.0114295	1.48686	2.06141e-11
987	ENSG00000153283	PPP1R35	protein_coding	0.190793	7.04606e-05	1.48654	0.00939676
988	ENSG00000157240	ORAI3	protein_coding	-0.833786	0.00239246	1.48547	0.00115166
989	ENSG00000135318	FZD1	protein_coding	-1.10945	2.54332e-07	1.48345	0.00223504
990	ENSG00000139343	LYAR	protein_coding	0.285421	2.06275e-05	1.4833	2.00048e-12
991	ENSG00000125743	SNRPF	protein_coding	1.14498	0.000269387	1.48081	1.05939e-06
992	ENSG00000106628	GTF2H2	protein_coding	-0.0597087	0.0123012	1.47882	7.95424e-11
993	ENSG00000221963	ZNF501	protein_coding	0.564014	0.0101766	1.4783	0.000734637
994	ENSG00000124159	SNRPD2	protein_coding	0.748088	0.0314839	1.4778	0.0491102
995	ENSG00000198930	STK10	protein_coding	-0.0350447	0.0303544	1.4772	0.0038755
996	ENSG00000178445	POLD2	protein_coding	0.521849	8.52119e-10	1.47708	0.00776774
997	ENSG00000189190	APOL6	protein_coding	-2.00215	0.00171473	1.47658	3.56707e-05
998	ENSG00000162576	CSAG1	protein_coding	2.60532	0.00839451	1.47579	0.000906482
999	ENSG00000186063	GLDC	protein_coding	5.27636	0.00463433	1.47553	2.06967e-14
1000	ENSG00000167552	CCDC125	protein_coding	-0.0552404	0.000725092	1.47493	9.60435e-05
1001	ENSG00000125691	AIDA	protein_coding	-0.833517	0.025673	1.47353	1.40173e-10
1002	ENSG00000170962	IKBKB	protein_coding	-0.536418	0.0022348	1.47321	0.0283363
1003	ENSG00000105438	TUBA1A	protein_coding	1.00968	0.00029013	1.47296	5.74035e-12
1004	ENSG00000198522	RPL23	protein_coding	0.625641	0.00976197	1.47094	1.03624e-11
1005	ENSG00000145685	PDGFD	protein_coding	-3.06071	0.000365778	1.46966	2.57934e-06
1006	ENSG00000144891	GPN1	protein_coding	0.546746	0.00468253	1.46813	0.0443521
1007	ENSG00000143942	LHFPL2	protein_coding	-1.12611	0.0138433	1.46692	5.76098e-07
1008	ENSG00000169230	SLFN11	protein_coding	-0.905574	0.0222029	1.46631	7.37529e-13
1009	ENSG00000111783	PRELID1	protein_coding	0.208147	0.00021909	1.46304	0.00665687
1010	ENSG00000172216	ITGA7	protein_coding	0.598512	4.48705e-08	1.46205	0.000211396
1011	ENSG00000182103	RFX4	protein_coding	2.39649	2.85745e-07	1.46144	0.0131643
1012	ENSG00000063177	CEBPB	protein_coding	-1.93048	0.0243817	1.46085	7.59704e-07
1013	ENSG00000173068	ZNF599	protein_coding	0.313026	0.0329813	1.46053	0.0208585
1014	ENSG00000148841	FAM181B	protein_coding	6.45722	0.00106873	1.45968	3.75934e-05
1015	ENSG00000183814	TMCO1	protein_coding	0.215415	0.00447783	1.45874	5.03628e-06
1016	ENSG00000013573	ITPRIP	protein_coding	-1.98047	9.33912e-06	1.4568	0.000222543
1017	ENSG00000104635	LIN9	protein_coding	0.933452	0.00241207	1.45648	0.000727883
1018	ENSG00000196517	MOSPD3	protein_coding	0.0959491	0.0015363	1.45554	0.00277744
1019	ENSG00000197324	TXNDC12	protein_coding	-0.0449797	1.48274e-07	1.45502	3.36642e-07
1020	ENSG00000010292	DDX11	protein_coding	1.37989	2.56015e-05	1.45417	4.92789e-07
1021	ENSG00000001617	SLC6A9	protein_coding	-1.80033	0.0249686	1.45353	0.0060244
1022	ENSG00000189046	LRP10	protein_coding	-3.05106	0.000534726	1.45332	4.39146e-08
1023	ENSG00000213977	ALKBH2	protein_coding	1.0126	7.13883e-06	1.45282	1.01997e-07
1024	ENSG00000106554	DONSON	protein_coding	-0.0152136	0.0435136	1.45053	7.72171e-14
1025	ENSG00000185201	GPR39	protein_coding	-0.536106	0.000393816	1.44965	0.00103445
1026	ENSG00000196653	CRLS1	protein_coding	-0.337005	0.0111865	1.44731	3.03564e-07
1027	ENSG00000131477	ZNF502	protein_coding	0.961416	2.47892e-06	1.4469	7.63812e-05
1028	ENSG00000256043	HMGN4	protein_coding	-0.433889	0.000876087	1.44524	1.33387e-06
1029	ENSG00000151665	RAMP2	protein_coding	3.75281	0.0308131	1.44343	9.49639e-11
1030	ENSG00000184486	RDX	protein_coding	-0.290154	1.56034e-08	1.44325	0.0022246
1031	ENSG00000174851	CTSO	protein_coding	-1.28592	9.4756e-05	1.4432	3.78712e-12
1032	ENSG00000167536	PIGF	protein_coding	0.324722	9.33782e-08	1.44224	0.000380568
1033	ENSG00000256269	POU3F2	protein_coding	4.2735	0.0101107	1.4421	6.12779e-09
1034	ENSG00000145247	YIF1A	protein_coding	-0.84878	0.00651593	1.44175	0.0377341
1035	ENSG00000168685	HMBS	protein_coding	0.51164	1.15342e-10	1.44123	0.0463565
1036	ENSG00000075142	OCIAD2	protein_coding	-3.69846	0.0058679	1.44005	1.43451e-06
1037	ENSG00000214706	RYK	protein_coding	0.102097	0.00307048	1.4382	2.87696e-11
1038	ENSG00000114473	IL7R	protein_coding	-4.98257	9.9337e-05	1.43649	0.00013531
1039	ENSG00000170855	GTF2IRD2	protein_coding	0.309068	0.00288951	1.43593	9.99314e-09
1040	ENSG00000164733	TRIAP1	protein_coding	0.78871	9.78043e-06	1.4343	0.000176657
1041	ENSG00000160298	CDC14C	protein_coding	-0.128538	0.00295056	1.43428	0.00148183
1042	ENSG00000239672	GORAB	protein_coding	-0.520422	2.52365e-05	1.43409	4.7661e-06
1043	ENSG00000108298	C21orf58	protein_coding	0.643841	0.00739712	1.42983	2.46163e-11
1044	ENSG00000122779	EPHA1	protein_coding	-0.0313452	0.0062086	1.42941	8.72414e-05
1045	ENSG00000084207	EIF1AY	protein_coding	0.47852	2.65609e-05	1.42912	1.88995e-08
1046	ENSG00000163666	INSM1	protein_coding	4.434	0.0376782	1.42846	3.07043e-05
1047	ENSG00000204592	GSTP1	protein_coding	1.01263	8.54071e-07	1.42677	2.18961e-05
1048	ENSG00000123685	SMAD5	protein_coding	-0.370066	0.00287918	1.42644	0.00795306
1049	ENSG00000129562	HLA-E	protein_coding	-3.17327	3.47617e-06	1.42569	5.88715e-10
1050	ENSG00000179051	ZNF587B	protein_coding	0.726829	1.4313e-05	1.42543	8.58204e-08
1051	ENSG00000138600	KRT16	protein_coding	-2.34192	0.000894351	1.42171	7.70728e-10
1052	ENSG00000183696	SPPL2A	protein_coding	-1.4423	0.000296936	1.41919	0.00116777
1053	ENSG00000136868	KIF24	protein_coding	-0.583996	0.0316351	1.4187	2.9163e-12
1054	ENSG00000159128	TMEM147	protein_coding	-0.39029	0.0224515	1.4187	1.09964e-09
1055	ENSG00000158201	UPP1	protein_coding	-1.27427	4.003e-06	1.41826	9.20195e-09
1056	ENSG00000162695	IFNGR2	protein_coding	-0.453126	0.0195233	1.41706	5.66965e-12
1057	ENSG00000147588	POLA1	protein_coding	0.535917	8.98397e-10	1.41689	0.0134879
1058	ENSG00000141736	ABHD3	protein_coding	1.54714	0.00975992	1.41596	0.00179304
1059	ENSG00000125257	MSRB1	protein_coding	0.178741	0.00670303	1.41589	9.34983e-07
1060	ENSG00000164743	SLC30A7	protein_coding	-0.644329	0.000145613	1.41464	0.00491245
1061	ENSG00000104341	ABCC4	protein_coding	1.39213	1.29666e-08	1.41155	2.33989e-06
1062	ENSG00000147140	WDHD1	protein_coding	0.465128	0.033654	1.41042	1.26956e-11
1063	ENSG00000130255	STT3A	protein_coding	-0.259909	0.008136	1.41041	3.20996e-06
1064	ENSG00000196418	LAPTM4B	protein_coding	2.05971	0.0138668	1.40944	4.64723e-06
1065	ENSG00000011465	SNRPC	protein_coding	0.589015	0.00226326	1.40929	0.0317677
1066	ENSG00000003096	RPL36	protein_coding	0.580706	0.0266569	1.40847	0.000211803
1067	ENSG00000059377	ZNF124	protein_coding	1.31846	0.0140779	1.40836	0.000416471
1068	ENSG00000178726	DCN	protein_coding	-4.45085	7.84146e-06	1.40798	0.0134457
1069	ENSG00000174799	KLHL13	protein_coding	0.820006	0.00819734	1.40732	0.000201687
1070	ENSG00000197879	CEP135	protein_coding	-1.04781	1.64345e-08	1.40572	8.00241e-06
1071	ENSG00000114391	TSPAN18	protein_coding	-0.320168	0.0484876	1.4049	5.52271e-06
1072	ENSG00000125457	ITGB8	protein_coding	0.292744	0.00629776	1.40476	4.228e-09
1073	ENSG00000101134	MYO1C	protein_coding	-1.83415	2.20636e-08	1.40465	0.000369915
1074	ENSG00000196569	RPL24	protein_coding	0.478583	0.0199193	1.40412	0.00334681
1075	ENSG00000168077	MIF4GD	protein_coding	0.706575	0.0202901	1.40348	0.000191624
1076	ENSG00000163874	ADH5	protein_coding	-0.167322	0.0388059	1.40338	0.00112928
1077	ENSG00000004864	LAMA2	protein_coding	-1.66936	4.34423e-09	1.40262	3.82897e-09
1078	ENSG00000057019	SCARA3	protein_coding	1.523	1.31241e-05	1.40138	0.00224766
1079	ENSG00000103852	ZC3H12A	protein_coding	-1.08264	0.0131493	1.40033	2.01027e-10
1080	ENSG00000196550	FERMT1	protein_coding	0.889722	0.000444047	1.39773	8.54135e-06
1081	ENSG00000179933	EFHC1	protein_coding	-0.567225	1.13542e-07	1.39609	1.64515e-08
1082	ENSG00000150961	FAM72A	protein_coding	1.28447	3.11795e-07	1.39581	3.94887e-06
1083	ENSG00000136938	CHRNA5	protein_coding	0.579237	5.82287e-05	1.39552	9.42315e-09
1084	ENSG00000160957	GALNT1	protein_coding	0.134671	0.000162234	1.39518	0.00230559
1085	ENSG00000153574	ANP32B	protein_coding	0.833041	0.00070768	1.39176	3.70851e-12
1086	ENSG00000173473	SLC35A4	protein_coding	-0.0421755	0.00012044	1.39071	6.63688e-06
1087	ENSG00000125931	ZMYM1	protein_coding	-0.361247	7.66868e-06	1.39043	0.0358916
1088	ENSG00000182179	SMARCC1	protein_coding	1.19521	0.00261586	1.38921	6.6762e-05
1089	ENSG00000149483	RGMA	protein_coding	1.28506	0.00210033	1.3881	2.15066e-12
1090	ENSG00000005884	UBA7	protein_coding	-2.40918	9.07087e-05	1.38795	0.0265384
1091	ENSG00000141519	DISC1	protein_coding	0.524364	0.0475328	1.38462	0.00163463
1092	ENSG00000075131	BUD31	protein_coding	0.412435	0.000238882	1.38312	8.94627e-10
1093	ENSG00000154188	PKIB	protein_coding	1.02258	3.58041e-07	1.38301	0.0397806
1094	ENSG00000064655	TIPIN	protein_coding	1.0433	4.55897e-08	1.38259	0.0177801
1095	ENSG00000141349	ANGPT1	protein_coding	-4.0916	5.16903e-05	1.3824	4.90332e-11
1096	ENSG00000006606	PKN3	protein_coding	0.39058	2.17892e-06	1.38103	0.0206147
1097	ENSG00000172086	DUSP4	protein_coding	0.46391	0.00620875	1.37822	1.41335e-08
1098	ENSG00000028137	ZNF3	protein_coding	0.747744	0.0357166	1.37809	0.00193678
1099	ENSG00000159200	EFNA2	protein_coding	0.288235	0.000890023	1.37729	0.0051519
1100	ENSG00000137275	KRCC1	protein_coding	-0.98476	0.0232374	1.3767	3.02741e-10
1101	ENSG00000106588	TNFRSF1B	protein_coding	1.50993	1.43416e-05	1.37618	5.29512e-07
1102	ENSG00000183684	RCAN1	protein_coding	-1.36325	0.000384347	1.3739	3.86669e-10
1103	ENSG00000076944	ALYREF	protein_coding	1.45788	0.0162672	1.36921	0.000206269
1104	ENSG00000249992	INTS12	protein_coding	-0.303467	2.27233e-05	1.36855	0.00677085
1105	ENSG00000030110	DECR1	protein_coding	0.134444	0.0316016	1.36814	4.59542e-11
1106	ENSG00000118503	STXBP2	protein_coding	-1.6753	0.0194336	1.36804	0.0013837
1107	ENSG00000117151	ATF5	protein_coding	-0.137778	2.82145e-05	1.36722	1.53686e-05
1108	ENSG00000161847	LILRB1	protein_coding	0.313154	0.000773377	1.36543	4.79026e-05
1109	ENSG00000134686	CTBS	protein_coding	-1.48896	0.0474354	1.36476	2.50453e-10
1110	ENSG00000050555	TPRKB	protein_coding	0.296057	3.50413e-09	1.36073	0.00376018
1111	ENSG00000133119	PHC2	protein_coding	0.392289	0.0138271	1.3586	7.63651e-05
1112	ENSG00000143621	RFC3	protein_coding	1.50843	0.00123479	1.35725	1.90888e-09
1113	ENSG00000144043	EEF1B2	protein_coding	0.354844	0.0109632	1.3563	3.32836e-13
1114	ENSG00000066294	STAP2	protein_coding	-0.165181	0.00925909	1.35435	0.00529206
1115	ENSG00000115282	TEX261	protein_coding	-0.49868	0.0153096	1.35406	9.1014e-10
1116	ENSG00000106009	ING3	protein_coding	0.118073	0.0166784	1.35333	4.17423e-07
1117	ENSG00000124067	ZIK1	protein_coding	0.412132	0.00648426	1.35324	5.44755e-07
1118	ENSG00000161016	CD84	protein_coding	1.46322	5.89401e-07	1.35298	9.74287e-07
1119	ENSG00000145604	TTC31	protein_coding	0.765436	5.45486e-05	1.35298	4.51804e-06
1120	ENSG00000104450	BRAT1	protein_coding	0.433052	0.000312418	1.35186	0.00266019
1121	ENSG00000086730	SLC12A4	protein_coding	-0.903696	0.0207082	1.35007	0.000283645
1122	ENSG00000164244	RPL8	protein_coding	1.06048	0.00458646	1.34964	4.77205e-12
1123	ENSG00000163623	SKP2	protein_coding	1.36521	0.0330293	1.34927	0.0337219
1124	ENSG00000149743	SPAG1	protein_coding	-1.39259	0.00133958	1.34912	4.15569e-09
1125	ENSG00000035403	PRRC1	protein_coding	-0.484729	2.19574e-10	1.34834	5.03667e-05
1126	ENSG00000101444	NKX6-1	protein_coding	-2.43206	1.93069e-07	1.34763	9.18553e-08
1127	ENSG00000183943	TRPT1	protein_coding	0.636389	0.00221835	1.34684	0.000649721
1128	ENSG00000101844	KATNA1	protein_coding	-0.112769	4.35826e-07	1.3467	1.05296e-11
1129	ENSG00000167565	AHCY	protein_coding	1.35105	8.22064e-05	1.34621	2.46624e-07
1130	ENSG00000267041	PRKX	protein_coding	2.06095	0.000375567	1.34618	0.000300524
1131	ENSG00000141543	ATG4A	protein_coding	-2.19356	0.0155775	1.34606	5.31627e-17
1132	ENSG00000105856	ST8SIA4	protein_coding	1.07488	0.00192672	1.34525	1.65664e-09
1133	ENSG00000198682	ZNF850	protein_coding	1.65092	0.00923534	1.34429	0.000199622
1134	ENSG00000131732	RPL13	protein_coding	-0.219589	7.91104e-05	1.34013	5.37502e-10
1135	ENSG00000172171	RPS20	protein_coding	0.210175	0.016924	1.34011	1.79602e-08
1136	ENSG00000170577	ZNF726	protein_coding	0.871881	0.0024509	1.34006	0.0441508
1137	ENSG00000128591	TEFM	protein_coding	-0.547289	2.25302e-07	1.33987	0.0384826
1138	ENSG00000172349	MEX3C	protein_coding	-0.377614	0.0148287	1.33874	0.000382508
1139	ENSG00000170889	RMI1	protein_coding	0.474157	0.00187117	1.33796	2.06689e-06
1140	ENSG00000187608	IL16	protein_coding	-1.67389	0.000381302	1.33652	0.03867
1141	ENSG00000137693	SKA2	protein_coding	0.227465	0.000225672	1.33473	0.00524756
1142	ENSG00000105971	C4B	protein_coding	-1.87451	2.76108e-10	1.33446	0.0146743
1143	ENSG00000114790	CAV2	protein_coding	-5.43444	0.00272004	1.33377	0.00104989
1144	ENSG00000249115	HCAR1	protein_coding	0.437698	0.0038427	1.33235	1.44811e-05
1145	ENSG00000159055	SDCBP	protein_coding	-0.0359716	0.000103792	1.33234	1.88454e-07
1146	ENSG00000160999	HAUS5	protein_coding	1.08152	0.00290045	1.33151	0.00102244
1147	ENSG00000144579	MIS18A	protein_coding	1.142	0.00189346	1.33081	1.41982e-09
1148	ENSG00000213139	TTI2	protein_coding	0.190957	0.00547219	1.33028	0.014884
1149	ENSG00000167470	SH2B2	protein_coding	1.94982	0.000390633	1.32925	1.73763e-05
1150	ENSG00000243678	PAX8	protein_coding	0.516458	0.00108802	1.3289	2.39084e-07
1151	ENSG00000142512	NME2	protein_coding	0.57701	0.00258053	1.32695	0.0119889
1152	ENSG00000160783	SLC52A2	protein_coding	0.16937	0.000266652	1.32675	5.99328e-10
1153	ENSG00000076053	C6orf52	protein_coding	0.634616	1.26676e-07	1.32673	1.45255e-08
1154	ENSG00000135253	SIGLEC10	protein_coding	1.71438	0.00460977	1.3261	0.00157945
1155	ENSG00000150457	PMF1	protein_coding	0.996063	1.49549e-06	1.32602	4.20509e-05
1156	ENSG00000005844	RBM7	protein_coding	-2.14602	0.0029442	1.32595	0.00486425
1157	ENSG00000168883	STRADB	protein_coding	0.426655	0.0151287	1.32544	5.30607e-17
1158	ENSG00000166889	GOLIM4	protein_coding	-0.0954497	0.0236203	1.32268	5.69719e-07
1159	ENSG00000100106	NTRK1	protein_coding	-1.84528	0.0234882	1.32242	1.96054e-08
1160	ENSG00000160124	TP63	protein_coding	-1.5966	0.000488162	1.32232	7.07152e-09
1161	ENSG00000120509	PATL1	protein_coding	-0.464937	0.000119663	1.32179	6.34094e-09
1162	ENSG00000131669	TRIOBP	protein_coding	-0.965089	0.00504723	1.32162	3.34216e-06
1163	ENSG00000007384	GMPR	protein_coding	-0.0375154	0.00287443	1.32081	0.000171915
1164	ENSG00000143384	TAF12	protein_coding	0.247384	0.000464306	1.3192	5.10187e-09
1165	ENSG00000178935	HIBADH	protein_coding	0.233521	0.0342039	1.31676	4.10802e-08
1166	ENSG00000023608	RAD51B	protein_coding	0.356812	0.00064094	1.31654	1.68201e-07
1167	ENSG00000188493	ZNF552	protein_coding	0.86398	0.000278433	1.31522	3.10805e-08
1168	ENSG00000134215	PIH1D2	protein_coding	-0.338255	0.00600191	1.31149	0.019903
1169	ENSG00000196497	FAM210B	protein_coding	-0.0335791	0.00150281	1.31118	1.00606e-06
1170	ENSG00000197451	CKAP4	protein_coding	-0.221758	0.0364861	1.31013	3.18343e-08
1171	ENSG00000105202	SLC16A13	protein_coding	0.676447	0.00365714	1.30921	2.15744e-07
1172	ENSG00000104881	GPC3	protein_coding	1.75756	6.9639e-06	1.30896	0.0017681
1173	ENSG00000133739	AP4M1	protein_coding	-0.0635996	0.0346291	1.3086	3.48522e-05
1174	ENSG00000135378	PPP1R13L	protein_coding	-3.36944	0.00644006	1.30837	0.00825021
1175	ENSG00000188321	SLC10A7	protein_coding	0.310173	3.12285e-05	1.30668	1.18443e-07
1176	ENSG00000198931	PRRG4	protein_coding	0.824178	3.56527e-11	1.30661	6.27004e-08
1177	ENSG00000126391	MIS12	protein_coding	-0.035978	0.0249259	1.30557	1.14128e-09
1178	ENSG00000163521	GSTCD	protein_coding	0.312019	0.032962	1.30554	2.12066e-06
1179	ENSG00000105829	GLB1L	protein_coding	0.999725	0.00127452	1.30479	1.75556e-05
1180	ENSG00000187741	LSM12	protein_coding	-0.00903845	0.000240654	1.30396	0.00202522
1181	ENSG00000160917	SDHD	protein_coding	0.00445627	0.00315527	1.3038	1.09431e-08
1182	ENSG00000149380	BET1	protein_coding	-1.21484	0.0229255	1.30269	0.0194353
1183	ENSG00000183311	CPSF4	protein_coding	0.99926	0.0276048	1.30254	1.54715e-06
1184	ENSG00000174989	P4HA3	protein_coding	-1.72371	0.00555061	1.30199	3.73869e-06
1185	ENSG00000176894	TUBB	protein_coding	0.447658	0.00216559	1.3009	1.76418e-05
1186	ENSG00000188243	TMED1	protein_coding	0.251881	0.0387381	1.30079	2.88882e-07
1187	ENSG00000125968	PXMP2	protein_coding	1.18846	0.00329717	1.29991	0.00419034
1188	ENSG00000101928	COMMD6	protein_coding	-0.845514	0.0228944	1.29988	1.08976e-09
1189	ENSG00000243989	SLC26A2	protein_coding	0.626987	1.21607e-05	1.29977	1.08566e-07
1190	ENSG00000204305	DDB2	protein_coding	-0.463956	0.00252762	1.29799	0.0013716
1191	ENSG00000169813	ENO3	protein_coding	0.367958	0.0323263	1.29633	1.09749e-11
1192	ENSG00000196935	OSCAR	protein_coding	-0.890404	0.012174	1.29616	0.000132132
1193	ENSG00000177084	HNRNPF	protein_coding	0.242052	0.0019368	1.29429	0.00119958
1194	ENSG00000256618	SRGAP1	protein_coding	0.695665	0.00114607	1.29426	0.00622677
1195	ENSG00000111481	SMN1	protein_coding	0.436765	0.0167087	1.29416	6.48427e-12
1196	ENSG00000119203	POLE	protein_coding	0.754311	0.000198647	1.29311	2.71869e-13
1197	ENSG00000182307	MTRNR2L1	protein_coding	1.31615	6.57858e-06	1.29254	2.17701e-06
1198	ENSG00000087116	COPZ1	protein_coding	0.656208	0.0105381	1.29213	0.0348918
1199	ENSG00000051128	KDR	protein_coding	-0.405739	0.000257816	1.29173	1.90575e-08
1200	ENSG00000160410	CPSF3	protein_coding	1.10348	0.00137289	1.29159	4.33354e-08
1201	ENSG00000189067	HOMER3	protein_coding	-1.15968	0.00516953	1.28965	6.22858e-07
1202	ENSG00000076248	SHKBP1	protein_coding	-0.826961	4.92347e-07	1.28947	3.61966e-09
1203	ENSG00000188785	TBL2	protein_coding	-0.416768	0.000916803	1.28933	1.0641e-06
1204	ENSG00000111971	CCDC71	protein_coding	0.317627	0.0093833	1.28921	6.7112e-06
1205	ENSG00000167969	LITAF	protein_coding	0.509811	0.000146829	1.28873	4.89056e-06
1206	ENSG00000101412	DLEC1	protein_coding	-0.453871	0.00342441	1.2876	0.00439304
1207	ENSG00000134222	ZNF528	protein_coding	0.28477	0.00461034	1.28741	0.00082503
1208	ENSG00000125611	IRAK1	protein_coding	0.0120562	0.00366311	1.28668	6.14814e-07
1209	ENSG00000147274	E2F1	protein_coding	0.751584	0.000773356	1.2866	4.28137e-09
1210	ENSG00000135486	DPY19L1	protein_coding	-0.218236	0.000252873	1.28588	1.64025e-08
1211	ENSG00000182871	LMO2	protein_coding	0.166616	0.000600205	1.28288	0.00819865
1212	ENSG00000187079	BANF1	protein_coding	0.223734	3.19833e-07	1.28245	5.3557e-05
1213	ENSG00000092929	COL18A1	protein_coding	-2.5738	0.0265685	1.28178	3.01621e-05
1214	ENSG00000179021	LAMA5	protein_coding	-0.0652093	0.00460152	1.28111	7.05925e-10
1215	ENSG00000116212	PFDN5	protein_coding	0.206251	0.00541177	1.27994	2.79708e-09
1216	ENSG00000215021	UNC13D	protein_coding	-0.968903	2.1309e-05	1.27916	1.29841e-08
1217	ENSG00000130158	MAB21L1	protein_coding	-0.880132	0.0192982	1.27822	0.000914653
1218	ENSG00000114850	PHB2	protein_coding	1.25755	0.00439205	1.27798	4.59139e-08
1219	ENSG00000109881	LEMD1	protein_coding	1.47445	0.000213967	1.2779	1.66295e-05
1220	ENSG00000100410	CCDC34	protein_coding	1.01946	0.00129809	1.27639	2.29863e-06
1221	ENSG00000109846	CPA4	protein_coding	-3.99076	0.0099619	1.27589	0.0240277
1222	ENSG00000014138	TTC27	protein_coding	0.175841	3.91525e-05	1.27522	2.16196e-06
1223	ENSG00000197647	CRYAB	protein_coding	-2.00212	0.00029311	1.27514	1.58293e-05
1224	ENSG00000105472	TMED5	protein_coding	0.460239	0.000616599	1.27506	0.000189284
1225	ENSG00000106305	POLA2	protein_coding	0.554051	0.00574466	1.27469	1.30304e-09
1226	ENSG00000143842	CLEC11A	protein_coding	1.41611	0.0495012	1.27332	0.00291445
1227	ENSG00000171960	TMEM43	protein_coding	-0.509689	1.58285e-06	1.27195	3.25372e-07
1228	ENSG00000100906	HVCN1	protein_coding	-0.518901	0.000162332	1.27194	0.000796105
1229	ENSG00000104299	SOX13	protein_coding	1.80519	0.0239586	1.27158	6.1327e-12
1230	ENSG00000011132	PPIH	protein_coding	0.683897	0.0403923	1.27079	2.45804e-08
1231	ENSG00000185905	APBA3	protein_coding	-0.437248	0.000166198	1.26882	0.00350309
1232	ENSG00000155380	DOCK11	protein_coding	-0.249161	0.00289386	1.26793	1.48433e-06
1233	ENSG00000125656	FKBP14	protein_coding	0.235464	1.54485e-05	1.26749	3.3284e-08
1234	ENSG00000132507	C16orf54	protein_coding	1.03442	0.00117624	1.2674	7.62587e-11
1235	ENSG00000135845	EIF5A	protein_coding	0.693839	0.0312816	1.26641	1.22809e-09
1236	ENSG00000143633	APEX2	protein_coding	0.364163	0.00735253	1.26575	2.36525e-11
1237	ENSG00000115541	NR1H3	protein_coding	-0.0296104	5.06479e-06	1.26559	5.62079e-08
1238	ENSG00000092969	C1orf131	protein_coding	0.490263	2.04728e-05	1.26456	0.0149681
1239	ENSG00000139546	HSPE1	protein_coding	1.2804	0.0142777	1.26367	5.55108e-07
1240	ENSG00000263956	ALG5	protein_coding	-0.103508	0.0279911	1.26305	4.68526e-06
1241	ENSG00000197961	TGFB2	protein_coding	-2.49481	0.000251889	1.263	2.93156e-06
1242	ENSG00000143147	ZNF121	protein_coding	1.67437	0.0308204	1.26139	0.000678851
1243	ENSG00000115307	ZNF792	protein_coding	-0.574178	0.015068	1.26115	9.0157e-13
1244	ENSG00000186866	GPR161	protein_coding	-1.38068	0.000390587	1.26005	9.44875e-08
1245	ENSG00000145012	AUP1	protein_coding	0.831715	0.000245698	1.25921	6.59176e-05
1246	ENSG00000088305	MCC	protein_coding	0.109086	0.000543589	1.25762	0.000895392
1247	ENSG00000091073	UNC119B	protein_coding	-0.216238	7.82718e-05	1.25358	2.56088e-08
1248	ENSG00000130827	POLM	protein_coding	-0.231294	0.00156908	1.253	0.000473009
1249	ENSG00000082781	RAB9A	protein_coding	0.467237	6.26807e-08	1.25265	0.000962066
1250	ENSG00000128641	PLXNA3	protein_coding	-0.924279	0.0108497	1.2523	0.00485226
1251	ENSG00000168040	ITGB5	protein_coding	-2.20924	2.51008e-06	1.25205	1.99994e-11
1252	ENSG00000146731	GDPD2	protein_coding	1.19979	0.000101365	1.24986	0.00906991
1253	ENSG00000104738	ZNF823	protein_coding	-0.105488	0.00490211	1.2491	0.000257917
1254	ENSG00000117593	CCT6A	protein_coding	1.21619	0.00675707	1.24764	1.63011e-10
1255	ENSG00000125734	MCM4	protein_coding	0.770249	0.0100567	1.24702	2.28351e-09
1256	ENSG00000031081	VSIG10	protein_coding	0.459588	3.55126e-05	1.2468	1.36719e-05
1257	ENSG00000173039	DARS2	protein_coding	0.864072	0.00029638	1.24649	6.29882e-14
1258	ENSG00000157326	SAMHD1	protein_coding	0.202961	0.0325492	1.24505	7.72117e-06
1259	ENSG00000151491	STARD3NL	protein_coding	0.188019	0.0416868	1.24473	1.35059e-08
1260	ENSG00000075624	RPS25	protein_coding	0.102845	0.000235683	1.24461	3.29146e-10
1261	ENSG00000100632	UACA	protein_coding	-0.313775	0.0138816	1.24404	1.59858e-06
1262	ENSG00000134333	EPS8	protein_coding	-0.860382	2.27267e-05	1.24255	0.000391258
1263	ENSG00000062716	MAP3K6	protein_coding	-0.427691	0.000420283	1.24216	1.50851e-05
1264	ENSG00000120699	ZCCHC4	protein_coding	0.341291	0.000512131	1.23936	9.36816e-06
1265	ENSG00000078177	VMP1	protein_coding	-1.37745	0.00751465	1.2391	1.01424e-05
1266	ENSG00000183770	EXOSC8	protein_coding	0.835162	0.0095812	1.23892	0.00409092
1267	ENSG00000196387	RB1	protein_coding	-0.382135	0.00440889	1.23857	5.32666e-09
1268	ENSG00000101974	FOXL2	protein_coding	-1.08234	0.00421271	1.23819	4.62587e-05
1269	ENSG00000115084	KANSL2	protein_coding	0.0540678	0.00884064	1.23791	2.52184e-08
1270	ENSG00000097033	CDKAL1	protein_coding	0.447755	0.000806142	1.23677	7.9127e-11
1271	ENSG00000114315	AKR1A1	protein_coding	0.0969296	0.00918478	1.23601	0.000423624
1272	ENSG00000116830	SALL4	protein_coding	0.340224	0.00103544	1.2316	2.34783e-07
1273	ENSG00000110031	IFRD1	protein_coding	-0.550921	4.5275e-05	1.23132	2.44705e-05
1274	ENSG00000125877	HSCB	protein_coding	0.0678173	0.00275894	1.23102	1.27904e-09
1275	ENSG00000120913	ITPA	protein_coding	0.701684	0.0120866	1.23015	5.04638e-07
1276	ENSG00000176386	GPC1	protein_coding	-0.717342	4.20437e-06	1.22971	5.7139e-09
1277	ENSG00000076067	NOTCH2	protein_coding	-0.522859	0.000577253	1.22929	2.41436e-08
1278	ENSG00000163513	MALT1	protein_coding	-0.329796	4.52728e-09	1.22848	0.00116056
1279	ENSG00000170275	RBMS2	protein_coding	-1.76619	0.0147877	1.22789	2.40375e-09
1280	ENSG00000156831	COMMD2	protein_coding	0.185709	0.00407825	1.22708	1.89151e-06
1281	ENSG00000110880	CRTAP	protein_coding	0.82188	2.75354e-05	1.22624	1.66333e-07
1282	ENSG00000185238	CORO1C	protein_coding	-1.16388	0.0216376	1.22507	4.01968e-06
1283	ENSG00000188846	CLIC2	protein_coding	0.994717	0.000245438	1.22416	1.24354e-08
1284	ENSG00000071282	SOWAHC	protein_coding	-0.195018	0.000409307	1.22231	0.000400858
1285	ENSG00000241852	TTC30B	protein_coding	0.166824	0.0343373	1.22096	4.705e-09
1286	ENSG00000131873	LMCD1	protein_coding	-3.61023	0.00234235	1.2198	8.35374e-05
1287	ENSG00000149806	RPN1	protein_coding	-0.174265	0.00454842	1.21959	2.15367e-06
1288	ENSG00000162909	FPGT	protein_coding	-0.505474	1.37251e-08	1.21838	2.04437e-07
1289	ENSG00000184840	GLIS2	protein_coding	-0.498614	0.000325853	1.21718	1.44633e-10
1290	ENSG00000076043	CCDC74B	protein_coding	-0.402905	6.85023e-07	1.21637	4.14228e-07
1291	ENSG00000142676	TULP3	protein_coding	0.0674037	0.00374345	1.21635	1.30971e-07
1292	ENSG00000172081	REXO2	protein_coding	-1.41339	0.0172826	1.21451	2.24663e-08
1293	ENSG00000251247	PIGW	protein_coding	-0.0158643	0.0115023	1.21353	1.0936e-06
1294	ENSG00000163156	MOB3A	protein_coding	-0.789693	0.00353318	1.21287	9.23371e-09
1295	ENSG00000147400	CLEC7A	protein_coding	0.578963	0.0152937	1.21233	0.000126966
1296	ENSG00000234545	TMEM231	protein_coding	0.463354	0.000248304	1.21126	1.15321e-06
1297	ENSG00000109084	SPICE1	protein_coding	0.786972	3.05573e-07	1.20758	3.88739e-05
1298	ENSG00000140092	UGDH	protein_coding	-0.345216	8.21361e-07	1.20728	0.0255472
1299	ENSG00000104856	TMEM209	protein_coding	0.101086	0.0117998	1.20683	0.000330348
1300	ENSG00000021355	TMEM97	protein_coding	1.7289	0.00123142	1.20664	0.00266914
1301	ENSG00000113721	FBLN5	protein_coding	-3.75605	3.876e-06	1.20652	0.00308339
1302	ENSG00000188483	FCAR	protein_coding	0.869297	0.000104083	1.2033	0.00649787
1303	ENSG00000101457	SYNE2	protein_coding	0.502	0.000464783	1.20245	1.47391e-10
1304	ENSG00000167004	CORO1B	protein_coding	-0.18693	0.00261046	1.20087	1.24423e-06
1305	ENSG00000172409	SBNO2	protein_coding	-0.0274674	0.000995647	1.19744	1.03677e-14
1306	ENSG00000100926	PAX1	protein_coding	1.15941	0.00192396	1.19691	9.14911e-07
1307	ENSG00000179387	NANP	protein_coding	0.0774253	0.020848	1.19564	9.18392e-12
1308	ENSG00000148484	SOX9	protein_coding	-1.84824	6.87402e-06	1.19552	1.614e-08
1309	ENSG00000198270	RSU1	protein_coding	-1.96777	0.0116452	1.19388	3.0036e-06
1310	ENSG00000056998	RFESD	protein_coding	-0.0730219	8.15273e-06	1.19372	0.0499044
1311	ENSG00000162772	NMD3	protein_coding	-0.0324564	0.000778963	1.19272	0.0106543
1312	ENSG00000185697	TMEM116	protein_coding	0.675155	1.48632e-05	1.19262	0.00158047
1313	ENSG00000135540	GYG2	protein_coding	3.11607	0.00962281	1.19236	0.000350724
1314	ENSG00000205323	ATF3	protein_coding	2.57926	2.28738e-08	1.19204	2.26467e-05
1315	ENSG00000095906	MYBL1	protein_coding	-2.05348	0.000496851	1.1916	6.84715e-07
1316	ENSG00000148229	NHSL1	protein_coding	0.73705	1.22983e-06	1.19128	8.68515e-07
1317	ENSG00000083828	POLE3	protein_coding	1.10494	0.00791533	1.18997	2.27654e-07
1318	ENSG00000164758	GEMIN6	protein_coding	0.481655	0.0489247	1.18901	7.31961e-07
1319	ENSG00000167085	MED30	protein_coding	0.67073	2.40474e-08	1.18767	1.14095e-08
1320	ENSG00000239900	PMAIP1	protein_coding	-1.22796	0.000134524	1.18495	1.5175e-05
1321	ENSG00000089159	PNO1	protein_coding	1.18482	1.72978e-06	1.18183	1.30433e-06
1322	ENSG00000145919	ADSL	protein_coding	1.15602	0.00306496	1.18166	2.90064e-07
1323	ENSG00000153094	FBN3	protein_coding	1.31055	0.000302731	1.18097	1.03779e-05
1324	ENSG00000129083	SRPRB	protein_coding	0.0473265	4.19691e-05	1.17947	7.03512e-12
1325	ENSG00000113369	COPB1	protein_coding	-1.01683	0.000702852	1.17892	0.000241709
1326	ENSG00000181722	HSD17B7	protein_coding	1.10068	0.00532247	1.17869	0.00135052
1327	ENSG00000111196	UBL5	protein_coding	-0.363766	0.0448748	1.17769	2.12562e-06
1328	ENSG00000162521	ARRDC3	protein_coding	1.71289	0.00393723	1.17706	8.06229e-09
1329	ENSG00000006062	SLC25A1	protein_coding	0.0210473	6.50155e-06	1.17643	4.14573e-05
1330	ENSG00000186298	MAGOHB	protein_coding	0.51896	0.00264078	1.17628	8.65377e-11
1331	ENSG00000113552	MAP3K14	protein_coding	-1.77257	5.06149e-05	1.17447	2.52849e-09
1332	ENSG00000164144	PPP1CC	protein_coding	0.547705	0.0105175	1.17406	1.6464e-11
1333	ENSG00000130826	GNPDA1	protein_coding	1.1888	0.000791648	1.17248	1.03617e-08
1334	ENSG00000140365	ARFIP1	protein_coding	-0.686233	0.000223544	1.17237	1.84864e-09
1335	ENSG00000114423	DKC1	protein_coding	0.642543	0.000106916	1.17211	1.37925e-05
1336	ENSG00000169418	NRAS	protein_coding	0.311234	0.00489519	1.17141	0.0487367
1337	ENSG00000143924	DNAJC1	protein_coding	0.00473983	0.000607024	1.17129	4.04469e-06
1338	ENSG00000027697	NPR1	protein_coding	1.78297	0.00317375	1.17019	4.90155e-05
1339	ENSG00000167720	EML4	protein_coding	0.821452	0.000195756	1.16991	2.28879e-06
1340	ENSG00000146757	IFNGR1	protein_coding	-0.982885	0.0334723	1.16975	1.81546e-05
1341	ENSG00000156500	SRR	protein_coding	0.635047	0.00793024	1.16923	1.2365e-05
1342	ENSG00000013306	ZNF92	protein_coding	1.32863	0.00945232	1.16918	9.14714e-13
1343	ENSG00000196476	SLC25A39	protein_coding	-0.338268	0.00168794	1.16869	0.000127296
1344	ENSG00000213859	C20orf96	protein_coding	1.24336	0.000136343	1.16777	2.20994e-06
1345	ENSG00000149150	KCTD11	protein_coding	-2.16385	5.89375e-05	1.16703	5.60791e-05
1346	ENSG00000148459	ZEB1	protein_coding	0.399484	0.0348054	1.16689	1.95027e-06
1347	ENSG00000076770	CD109	protein_coding	-4.36793	6.11565e-07	1.16684	0.00245584
1348	ENSG00000138621	PDSS1	protein_coding	0.838422	0.00158688	1.16637	5.8753e-07
1349	ENSG00000185215	MBNL3	protein_coding	3.19687	0.0146986	1.16629	0.0460594
1350	ENSG00000197019	PSKH1	protein_coding	0.142904	9.01704e-08	1.16552	0.000770842
1351	ENSG00000070731	GBP4	protein_coding	0.743512	0.00206669	1.16447	0.0372349
1352	ENSG00000116096	SERTAD1	protein_coding	-2.60317	0.00162432	1.16269	7.89664e-05
1353	ENSG00000094914	PODNL1	protein_coding	-1.20864	9.72118e-06	1.16256	1.0342e-08
1354	ENSG00000070540	ST6GALNAC2	protein_coding	-2.59393	1.41873e-05	1.16243	4.00724e-05
1355	ENSG00000095319	SPR	protein_coding	1.15839	0.00190627	1.16237	0.00022582
1356	ENSG00000116489	SMC5	protein_coding	0.811628	0.0210587	1.1588	6.50238e-09
1357	ENSG00000140497	ZNF491	protein_coding	0.767452	0.000276804	1.15823	1.88046e-10
1358	ENSG00000146535	CREB3L2	protein_coding	-0.490766	0.000109114	1.15742	6.08442e-06
1359	ENSG00000177700	GNA12	protein_coding	-0.557961	0.00144148	1.15692	0.000115465
1360	ENSG00000083312	ARL4A	protein_coding	0.536188	0.00078113	1.15673	5.72361e-09
1361	ENSG00000137168	POLR2L	protein_coding	-0.963008	0.0104684	1.1564	0.000146747
1362	ENSG00000173221	CENPN	protein_coding	0.129352	2.74854e-07	1.15579	0.00213088
1363	ENSG00000157593	PPIL1	protein_coding	0.813183	0.00861264	1.15532	5.15354e-07
1364	ENSG00000073331	SLC35B2	protein_coding	0.408963	0.00105736	1.15368	0.0151049
1365	ENSG00000256525	FIGN	protein_coding	-0.0318211	0.00890833	1.15335	1.99485e-06
1366	ENSG00000077238	ALPK1	protein_coding	1.40029	0.000236206	1.15306	0.00288283
1367	ENSG00000154274	ZNF266	protein_coding	0.284514	0.00264796	1.15143	0.0218065
1368	ENSG00000107554	C4orf19	protein_coding	1.39518	0.0386275	1.15074	0.000406011
1369	ENSG00000120063	DNMBP	protein_coding	-1.18782	0.00118977	1.14943	5.33215e-08
1370	ENSG00000158006	TMEM187	protein_coding	-0.145429	5.16797e-06	1.14937	2.08557e-09
1371	ENSG00000102931	GNA13	protein_coding	-1.27267	0.0268149	1.14899	3.34822e-06
1372	ENSG00000150281	PAFAH2	protein_coding	1.26137	0.00195074	1.14865	0.0017644
1373	ENSG00000131446	ARL2BP	protein_coding	0.461556	1.37734e-08	1.14842	5.14999e-09
1374	ENSG00000111752	CTF1	protein_coding	-3.04049	0.00622685	1.14805	7.15015e-05
1375	ENSG00000161920	CYB5A	protein_coding	-0.411395	0.00489203	1.14728	8.07271e-08
1376	ENSG00000100234	CCDC50	protein_coding	-0.715481	0.00781774	1.14599	0.0136469
1377	ENSG00000185043	ADAM17	protein_coding	-0.21766	1.27305e-05	1.14577	2.46577e-06
1378	ENSG00000156273	GTF2A2	protein_coding	0.0543972	0.0049969	1.14469	1.9643e-06
1379	ENSG00000101182	STAC3	protein_coding	0.296422	0.0195676	1.1428	7.67979e-07
1380	ENSG00000144591	DCHS1	protein_coding	-0.790712	0.0381368	1.14206	1.57077e-11
1381	ENSG00000196664	GMPPA	protein_coding	-0.430247	0.00937155	1.14144	0.0202159
1382	ENSG00000085491	PCK2	protein_coding	-0.607857	0.00250234	1.1407	0.00130112
1383	ENSG00000095209	CCND1	protein_coding	-0.696869	0.0225135	1.13959	5.31573e-05
1384	ENSG00000132603	RNF114	protein_coding	-0.152174	0.00713317	1.13754	6.28031e-08
1385	ENSG00000157224	TTC25	protein_coding	0.599806	0.0225948	1.13657	2.58633e-05
1386	ENSG00000119977	CHRAC1	protein_coding	0.130195	0.00173904	1.13632	2.66166e-09
1387	ENSG00000197756	KLHL6	protein_coding	1.15438	2.94272e-05	1.13529	9.72893e-06
1388	ENSG00000120217	RPL37A	protein_coding	0.929299	0.0191807	1.13414	0.0462617
1389	ENSG00000137285	LPAR2	protein_coding	0.316086	1.04778e-11	1.13403	0.00771212
1390	ENSG00000143368	CCNE2	protein_coding	0.161242	0.000540147	1.13303	9.6374e-11
1391	ENSG00000122547	VEZF1	protein_coding	-0.155939	0.00990503	1.13124	0.00414518
1392	ENSG00000172269	EEPD1	protein_coding	1.36805	0.0138857	1.13028	2.24982e-13
1393	ENSG00000151348	ELF3	protein_coding	1.00184	0.000129254	1.12995	1.74926e-07
1394	ENSG00000101871	EBF1	protein_coding	0.0227978	0.0412591	1.12954	0.00145271
1395	ENSG00000070190	FAH	protein_coding	-0.564082	0.0187916	1.12936	0.0212514
1396	ENSG00000163882	MID1	protein_coding	-0.637688	0.0131838	1.1291	5.96289e-08
1397	ENSG00000140905	EFHC2	protein_coding	0.623088	6.5433e-10	1.12815	6.01094e-06
1398	ENSG00000135441	NUP54	protein_coding	-0.293505	0.00741335	1.12733	0.000214685
1399	ENSG00000077312	GCSH	protein_coding	1.88316	6.27662e-07	1.12722	5.62245e-09
1400	ENSG00000102317	TTC24	protein_coding	0.426887	0.000733097	1.12578	3.10505e-06
1401	ENSG00000111445	P2RX4	protein_coding	0.558311	0.00799892	1.12427	4.15924e-06
1402	ENSG00000112249	HSH2D	protein_coding	1.47891	0.037295	1.12141	1.53566e-05
1403	ENSG00000100625	CBR3	protein_coding	0.458262	0.000341239	1.12015	0.0331866
1404	ENSG00000146802	CAPS	protein_coding	1.53572	0.00706238	1.11805	8.83635e-07
1405	ENSG00000179163	KLF6	protein_coding	0.118998	0.00278091	1.11705	0.000868186
1406	ENSG00000123130	FBXO17	protein_coding	-0.163115	2.44656e-05	1.11648	2.45541e-07
1407	ENSG00000179604	FUCA1	protein_coding	-1.78911	0.0103086	1.11563	0.00164778
1408	ENSG00000126749	MRPL52	protein_coding	0.261961	0.00714071	1.11551	1.42806e-07
1409	ENSG00000221944	EMG1	protein_coding	0.712472	2.17251e-05	1.11425	0.00025384
1410	ENSG00000144455	MRPL53	protein_coding	0.352327	0.0270818	1.11271	4.38177e-05
1411	ENSG00000162704	PARD6G	protein_coding	0.41272	0.000875421	1.11251	6.24784e-06
1412	ENSG00000125630	SUMF1	protein_coding	-0.799191	0.00263298	1.11245	5.41121e-08
1413	ENSG00000164941	ELP4	protein_coding	-0.304567	0.0234439	1.11243	7.13803e-09
1414	ENSG00000160213	POLR1B	protein_coding	1.12519	0.00244567	1.1114	2.02552e-07
1415	ENSG00000164011	MPV17	protein_coding	0.181559	0.0294325	1.10983	1.28625e-08
1416	ENSG00000178685	DDIT4L	protein_coding	-1.71055	0.0115916	1.1088	0.00704917
1417	ENSG00000007174	GLT8D1	protein_coding	0.198738	1.73449e-07	1.10868	0.0498097
1418	ENSG00000034677	ZNF691	protein_coding	-0.434084	0.0411881	1.10839	0.000815992
1419	ENSG00000100814	EIF4EBP3	protein_coding	0.23828	0.0314186	1.1055	0.00131051
1420	ENSG00000138738	RPS23	protein_coding	0.418661	0.000325453	1.1054	0.000447284
1421	ENSG00000111786	MRPS12	protein_coding	0.363284	0.00106461	1.10539	8.50752e-13
1422	ENSG00000111142	SRSF9	protein_coding	0.839532	0.00699756	1.10436	4.579e-11
1423	ENSG00000070882	METAP2	protein_coding	0.767791	0.00371404	1.10285	0.00563576
1424	ENSG00000142864	TEX22	protein_coding	-0.0675747	0.000313816	1.10203	6.83803e-09
1425	ENSG00000158156	SERBP1	protein_coding	1.16468	0.0121116	1.10109	0.00390044
1426	ENSG00000035141	NCSTN	protein_coding	-0.356597	8.93887e-05	1.10093	4.80801e-09
1427	ENSG00000138092	XKR8	protein_coding	-1.62484	0.00108047	1.10087	9.51222e-05
1428	ENSG00000134748	CENPO	protein_coding	1.66027	1.29365e-09	1.10037	2.63712e-07
1429	ENSG00000110756	PSMB10	protein_coding	0.497969	0.000202216	1.10024	4.89489e-08
1430	ENSG00000171155	PRPF38A	protein_coding	1.31063	0.000161371	1.09919	1.85967e-07
1431	ENSG00000130517	CARHSP1	protein_coding	0.859925	0.00734745	1.09806	1.60625e-05
1432	ENSG00000040531	SRD5A2	protein_coding	-0.042125	2.32819e-06	1.0956	8.31398e-09
1433	ENSG00000184009	ERMAP	protein_coding	0.711777	2.59551e-05	1.09492	5.96096e-09
1434	ENSG00000185650	CYFIP1	protein_coding	-0.071957	6.86268e-05	1.09357	0.000542093
1435	ENSG00000100353	NFE2L2	protein_coding	-0.387219	0.00892933	1.09317	2.0702e-08
1436	ENSG00000125970	ZFP36L1	protein_coding	-1.45931	0.000385395	1.09287	9.20295e-10
1437	ENSG00000132781	ZNF286A	protein_coding	0.223114	0.000180541	1.09248	3.07116e-05
1438	ENSG00000166557	PLXNB2	protein_coding	-0.410578	0.0349893	1.09218	1.93218e-05
1439	ENSG00000116455	CEP112	protein_coding	-0.433939	9.62835e-08	1.09204	5.74223e-13
1440	ENSG00000185608	SUV39H2	protein_coding	0.378998	7.47857e-06	1.09084	7.58057e-06
1441	ENSG00000214026	C8orf76	protein_coding	-0.743529	0.000569192	1.08935	0.00022777
1442	ENSG00000214022	ST7	protein_coding	0.750883	0.00152418	1.08903	2.24423e-05
1443	ENSG00000205155	SLC26A6	protein_coding	0.493206	4.50196e-05	1.08801	4.14161e-06
1444	ENSG00000136908	MRPL23	protein_coding	1.2765	0.00173524	1.08778	3.1671e-07
1445	ENSG00000143061	DPM2	protein_coding	0.715027	0.000322005	1.08708	0.0262806
1446	ENSG00000155115	SHISA3	protein_coding	-1.42827	0.00107141	1.08688	2.86526e-08
1447	ENSG00000213445	IGSF3	protein_coding	3.44382	0.0206742	1.08686	0.000127926
1448	ENSG00000169682	ZNF473	protein_coding	0.0406587	1.10015e-06	1.08675	0.000148105
1449	ENSG00000110060	SIPA1	protein_coding	-0.491525	0.00236299	1.08623	1.28139e-08
1450	ENSG00000181315	SPNS1	protein_coding	0.895255	0.00565878	1.08616	6.12753e-06
1451	ENSG00000181588	ZNF765	protein_coding	-0.193881	0.022379	1.08541	0.00116288
1452	ENSG00000125458	ZNF322	protein_coding	-1.04077	2.14661e-05	1.08501	1.00514e-06
1453	ENSG00000133773	NT5C	protein_coding	1.11916	0.0187407	1.08397	3.61678e-06
1454	ENSG00000022267	DDIT3	protein_coding	-0.282557	0.00286786	1.08317	0.0021884
1455	ENSG00000171621	LIX1L	protein_coding	0.0657353	6.62445e-08	1.08166	0.00507025
1456	ENSG00000153395	ZDHHC1	protein_coding	-0.310068	0.0481893	1.08152	3.65646e-05
1457	ENSG00000174744	ZNF43	protein_coding	0.397912	0.022947	1.07928	6.6633e-11
1458	ENSG00000157778	PLCB3	protein_coding	-0.325878	3.39962e-05	1.078	6.82871e-05
1459	ENSG00000160949	BRMS1	protein_coding	-0.288183	1.04465e-05	1.07765	0.0130589
1460	ENSG00000166450	LSM1	protein_coding	-0.154807	0.0420103	1.07595	0.00824879
1461	ENSG00000154719	NME7	protein_coding	-0.437324	0.00159239	1.07522	7.16942e-07
1462	ENSG00000187514	BCAT1	protein_coding	0.250146	0.0138324	1.07518	6.01348e-07
1463	ENSG00000076706	HADH	protein_coding	0.240106	0.0389175	1.0738	0.00158133
1464	ENSG00000115970	MITD1	protein_coding	0.206289	0.025823	1.07368	8.33323e-13
1465	ENSG00000172331	PMM2	protein_coding	-0.0816781	0.00127645	1.07344	1.73597e-07
1466	ENSG00000170348	MCAM	protein_coding	1.38712	0.000330734	1.07327	1.69861e-07
1467	ENSG00000161960	THADA	protein_coding	0.758639	0.0120407	1.07327	9.08743e-06
1468	ENSG00000166813	EIF4A1	protein_coding	0.590653	5.3747e-05	1.07237	0.0026473
1469	ENSG00000139926	ITGAV	protein_coding	-0.36672	1.18084e-06	1.07053	0.000908004
1470	ENSG00000160050	FRMD6	protein_coding	-2.20026	0.000177552	1.06961	0.00040618
1471	ENSG00000171522	SOX6	protein_coding	2.46419	7.81478e-07	1.06896	0.0313918
1472	ENSG00000148248	PGM3	protein_coding	-0.709273	0.000436362	1.06886	2.99073e-07
1473	ENSG00000171016	PTGER4	protein_coding	-3.328	0.00810021	1.06879	6.48663e-05
1474	ENSG00000073712	SURF4	protein_coding	-0.932952	0.0315895	1.06857	0.000625645
1475	ENSG00000104897	WARS2	protein_coding	0.189725	0.00238051	1.06816	6.99196e-05
1476	ENSG00000188010	FERMT2	protein_coding	-1.07447	0.0366301	1.06802	0.000525323
1477	ENSG00000173548	HSPA5	protein_coding	0.337306	0.0010086	1.06719	3.47001e-05
1478	ENSG00000196843	SF3A2	protein_coding	0.753945	0.00455897	1.06609	0.000287737
1479	ENSG00000126561	MORN2	protein_coding	-0.298926	0.00130023	1.06563	0.000140172
1480	ENSG00000197111	ARID5A	protein_coding	1.52992	0.0090441	1.06512	1.48581e-12
1481	ENSG00000140263	PCBP2	protein_coding	0.331122	2.87536e-08	1.06451	6.53651e-05
1482	ENSG00000161381	ZNF789	protein_coding	0.650139	0.0158134	1.0642	0.00963357
1483	ENSG00000131171	CLN3	protein_coding	-0.555959	0.00577982	1.06173	1.34839e-08
1484	ENSG00000179029	DPP3	protein_coding	-0.0089321	0.00115913	1.06166	0.000237832
1485	ENSG00000156804	SH3BGRL	protein_coding	-0.684876	3.17907e-05	1.06085	0.0310828
1486	ENSG00000162385	TRNAU1AP	protein_coding	0.437223	0.00450143	1.06043	9.92018e-08
1487	ENSG00000136824	MAGOH	protein_coding	0.405061	2.62444e-05	1.05992	0.0014929
1488	ENSG00000167670	LSM6	protein_coding	0.163108	3.31604e-07	1.05928	0.00759626
1489	ENSG00000186827	CHAF1A	protein_coding	0.673906	0.0260414	1.05829	0.0160948
1490	ENSG00000087206	ETNK2	protein_coding	-0.506735	0.0233483	1.05807	5.0182e-09
1491	ENSG00000196639	TNFRSF4	protein_coding	1.25709	2.74688e-05	1.05794	0.0238126
1492	ENSG00000111641	ZNF117	protein_coding	0.986171	0.00110424	1.05732	6.06024e-06
1493	ENSG00000161996	TMEM120A	protein_coding	-0.00420312	0.00104188	1.05692	0.0202696
1494	ENSG00000237172	CBWD1	protein_coding	0.379894	2.73148e-08	1.05607	0.00444268
1495	ENSG00000160789	FNTA	protein_coding	0.121121	0.0038978	1.05492	0.00159032
1496	ENSG00000188612	OSGEPL1	protein_coding	0.362906	0.0216618	1.05406	7.39245e-11
1497	ENSG00000184047	LMNA	protein_coding	-1.06619	0.00802357	1.05374	5.81601e-08
1498	ENSG00000100211	DIABLO	protein_coding	0.497699	0.00200867	1.05185	3.34976e-06
1499	ENSG00000117586	CTNND1	protein_coding	-0.352903	8.88526e-11	1.05125	0.0333921
1500	ENSG00000132004	EIF3F	protein_coding	-0.112393	0.00367119	1.05104	4.44784e-05
1501	ENSG00000086544	PSMB3	protein_coding	0.274171	0.0087011	1.05089	0.00137969
1502	ENSG00000115241	RPL34	protein_coding	-0.0636736	9.22177e-06	1.05032	1.04944e-08
1503	ENSG00000071967	FBXL12	protein_coding	-0.331883	5.0523e-05	1.04996	0.00537344
1504	ENSG00000122034	PPM1G	protein_coding	0.454019	0.0216118	1.04941	4.65762e-05
1505	ENSG00000113583	GTF3A	protein_coding	0.577247	0.0148748	1.0488	1.32503e-06
1506	ENSG00000148400	WASF2	protein_coding	-0.418555	1.05406e-08	1.04849	0.017373
1507	ENSG00000147905	FRMD3	protein_coding	0.566023	0.0220811	1.04825	1.75089e-05
1508	ENSG00000092199	ZCCHC7	protein_coding	0.62202	0.000413165	1.04763	1.06267e-09
1509	ENSG00000144061	HNRNPC	protein_coding	0.796665	3.09795e-05	1.04718	0.000271592
1510	ENSG00000171451	PRR5L	protein_coding	-1.35485	0.0262518	1.04679	0.00410778
1511	ENSG00000164405	NPHP1	protein_coding	-1.6613	6.42129e-05	1.04663	0.000408732
1512	ENSG00000085276	DSEL	protein_coding	0.61375	0.000214647	1.04632	0.00716563
1513	ENSG00000172296	TRMT2B	protein_coding	0.264318	0.000350722	1.04584	0.0321169
1514	ENSG00000139372	UQCRQ	protein_coding	0.281445	0.000377587	1.04572	2.36963e-06
1515	ENSG00000129566	SPTLC3	protein_coding	1.27342	0.000150547	1.04539	7.18069e-05
1516	ENSG00000197020	TDG	protein_coding	1.10575	0.0309915	1.04539	0.000275168
1517	ENSG00000140848	ELAC1	protein_coding	0.424098	0.00101753	1.04497	0.00210503
1518	ENSG00000142867	CPNE2	protein_coding	1.52638	4.68619e-05	1.04443	1.83523e-09
1519	ENSG00000134758	VDR	protein_coding	-2.54482	0.00101765	1.04247	2.1335e-07
1520	ENSG00000226763	ZNF35	protein_coding	0.663306	0.0153586	1.04015	0.00367233
1521	ENSG00000109323	ZDHHC15	protein_coding	0.298506	0.00484328	1.04002	7.89566e-07
1522	ENSG00000254004	PPP1CA	protein_coding	0.267876	0.000504884	1.03903	4.72678e-05
1523	ENSG00000213047	ZNF709	protein_coding	0.482515	0.0243131	1.03853	7.3668e-06
1524	ENSG00000136261	COQ5	protein_coding	0.0436365	0.00204	1.03832	0.00214269
1525	ENSG00000123728	BZW2	protein_coding	0.720555	0.0201995	1.03727	5.40636e-08
1526	ENSG00000091127	HBE1	protein_coding	0.70384	0.00117355	1.03718	3.83369e-05
1527	ENSG00000157349	ITGAE	protein_coding	-0.0465595	0.0147382	1.03692	9.31995e-11
1528	ENSG00000154813	PUS7	protein_coding	0.896621	2.57892e-05	1.03665	1.05733e-06
1529	ENSG00000136271	DDX52	protein_coding	0.0206551	8.43402e-05	1.03507	1.1402e-06
1530	ENSG00000065243	CLDN15	protein_coding	-0.141121	0.0399962	1.03472	1.2022e-07
1531	ENSG00000164406	XRCC4	protein_coding	0.387651	0.00543335	1.0343	0.00914931
1532	ENSG00000169403	PKN2	protein_coding	-0.489213	0.0186388	1.03335	0.0277934
1533	ENSG00000189403	LEAP2	protein_coding	1.24959	0.00150968	1.03312	5.79476e-06
1534	ENSG00000077721	PRELID2	protein_coding	-0.771856	5.8578e-06	1.03304	3.90745e-08
1535	ENSG00000167797	ARC	protein_coding	3.15445	0.0021934	1.03002	4.38698e-07
1536	ENSG00000165609	SORBS3	protein_coding	-0.97107	0.00404088	1.02777	5.86576e-09
1537	ENSG00000123268	ASCC2	protein_coding	0.268669	0.00449055	1.02541	5.30241e-07
1538	ENSG00000136158	SLC30A5	protein_coding	-0.222809	0.00616148	1.02532	0.0149049
1539	ENSG00000079616	EIF2D	protein_coding	0.373644	0.000138753	1.02501	0.00122276
1540	ENSG00000116497	KIF22	protein_coding	1.00819	0.0228891	1.02441	2.24903e-07
1541	ENSG00000125870	CHPF	protein_coding	-0.0540025	4.75719e-06	1.02414	3.15583e-06
1542	ENSG00000136933	IRAK1BP1	protein_coding	0.688766	0.0377287	1.024	1.87648e-05
1543	ENSG00000116641	S100PBP	protein_coding	-0.647349	0.0193389	1.0239	6.28478e-05
1544	ENSG00000183963	DOCK7	protein_coding	-0.733002	0.00102057	1.0227	0.00540721
1545	ENSG00000122591	ZNF670	protein_coding	0.262573	0.00263851	1.02244	0.00057453
1546	ENSG00000137054	FAM126A	protein_coding	-0.973221	0.0347278	1.02215	1.48173e-05
1547	ENSG00000177732	TYW1	protein_coding	0.158344	1.8356e-05	1.0221	0.00487136
1548	ENSG00000126457	SLC25A20	protein_coding	0.536341	0.000129881	1.0218	0.000392261
1549	ENSG00000157184	CAD	protein_coding	0.275079	0.0116435	1.02089	3.44566e-10
1550	ENSG00000114767	DALRD3	protein_coding	0.28457	2.08684e-07	1.02047	3.97421e-06
1551	ENSG00000198860	RRP9	protein_coding	1.40885	0.0212781	1.01961	1.33275e-05
1552	ENSG00000118680	CERS5	protein_coding	-0.203463	0.00784083	1.01953	8.08706e-05
1553	ENSG00000121064	PM20D2	protein_coding	0.284542	0.00314795	1.0195	0.000165523
1554	ENSG00000181467	TSEN15	protein_coding	0.497243	0.0316238	1.01926	3.00903e-05
1555	ENSG00000114956	SCPEP1	protein_coding	-1.47288	0.000407492	1.01885	2.57324e-06
1556	ENSG00000112210	ALDH3A1	protein_coding	-1.83197	4.24982e-06	1.01815	0.000284276
1557	ENSG00000203943	GABPA	protein_coding	-0.00700298	0.0326614	1.01775	0.00170846
1558	ENSG00000162599	RAB23	protein_coding	-2.50215	0.0290339	1.01734	0.00774188
1559	ENSG00000240184	SAMD13	protein_coding	0.92809	0.00653006	1.0173	0.0472528
1560	ENSG00000108651	PCDHGC3	protein_coding	-2.23848	0.00108297	1.01582	6.16955e-11
1561	ENSG00000171298	BFAR	protein_coding	-0.179374	0.0476537	1.01547	0.000740612
1562	ENSG00000091947	CNIH4	protein_coding	-0.121761	3.73212e-05	1.01448	1.20243e-07
1563	ENSG00000155957	PAXIP1	protein_coding	0.454605	0.0117002	1.01351	0.000400082
1564	ENSG00000131759	ERP44	protein_coding	0.295802	5.37741e-05	1.01295	0.000556536
1565	ENSG00000110651	RARA	protein_coding	-1.10306	0.00023028	1.01125	2.53748e-06
1566	ENSG00000134851	HSPBAP1	protein_coding	0.032827	2.59218e-06	1.01079	0.000327134
1567	ENSG00000034510	CD81	protein_coding	-1.10799	5.51814e-08	1.00971	0.00331128
1568	ENSG00000141994	TMEM165	protein_coding	-0.996148	1.23666e-05	1.00968	3.39778e-05
1569	ENSG00000074201	IFI27	protein_coding	-1.29346	0.000122474	1.00929	4.05904e-08
1570	ENSG00000106615	CLNS1A	protein_coding	0.636013	0.0144872	1.00766	3.7624e-05
1571	ENSG00000151116	METTL18	protein_coding	0.0425236	2.68752e-05	1.00667	5.2185e-07
1572	ENSG00000113460	ZNF45	protein_coding	-0.429248	0.00880957	1.00664	3.77729e-07
1573	ENSG00000184924	TMEM14B	protein_coding	-0.0212388	3.37498e-05	1.00555	0.000281925
1574	ENSG00000173950	PTRHD1	protein_coding	0.999035	0.0340387	1.00515	1.06301e-05
1575	ENSG00000172572	CDC73	protein_coding	-0.417123	0.0106248	1.00464	0.0270876
1576	ENSG00000196975	XXYLT1	protein_coding	0.616939	0.01255	1.00401	0.00206434
1577	ENSG00000176619	PDE3A	protein_coding	-1.94785	0.0264476	1.00374	0.0104345
1578	ENSG00000203883	ANXA4	protein_coding	-1.26347	0.0354278	1.00325	0.0144231
1579	ENSG00000223547	SOX18	protein_coding	1.61165	0.0317486	1.0023	0.00208142
1580	ENSG00000099139	BLVRA	protein_coding	-0.0614558	0.0119056	1.00222	0.0207161
1581	ENSG00000142657	ZNF844	protein_coding	1.23934	0.049776	1.00204	1.72434e-06
1582	ENSG00000129255	PCSK5	protein_coding	1.29048	0.000777644	1.00122	5.09935e-06
1583	ENSG00000115207	INSRR	protein_coding	-2.16448	0.00552132	0.99953	7.43992e-09
1584	ENSG00000144048	GTF3C2	protein_coding	0.726944	0.0159747	0.998274	4.16055e-07
1585	ENSG00000183431	E2F6	protein_coding	0.31118	0.00707584	0.997555	1.0023e-10
1586	ENSG00000065183	MIOS	protein_coding	-0.028433	0.00073798	0.996777	4.49952e-06
1587	ENSG00000132383	ARSI	protein_coding	-0.99585	0.00713557	0.995063	5.19909e-07
1588	ENSG00000197417	LTBP3	protein_coding	-0.234518	9.14753e-06	0.994201	1.71049e-05
1589	ENSG00000122507	WSCD1	protein_coding	5.64975	0.000808223	0.9941	1.48741e-05
1590	ENSG00000108561	PSMC2	protein_coding	-0.141648	2.04586e-07	0.991321	2.86956e-05
1591	ENSG00000254093	HMGCL	protein_coding	-0.205853	0.000641766	0.990524	3.7691e-06
1592	ENSG00000077150	QSER1	protein_coding	-0.361228	0.00236128	0.987956	0.00140123
1593	ENSG00000172239	C5orf34	protein_coding	-0.141592	0.0099349	0.987915	2.7685e-10
1594	ENSG00000197798	NFKB2	protein_coding	-1.39036	3.43282e-05	0.987203	6.91074e-06
1595	ENSG00000099901	PAIP1	protein_coding	-0.522772	5.02752e-06	0.987141	0.000119058
1596	ENSG00000072210	C9orf64	protein_coding	-1.43981	0.00962362	0.985628	3.39418e-05
1597	ENSG00000140750	GPC4	protein_coding	-1.37128	0.000401561	0.984602	3.28128e-06
1598	ENSG00000176783	CCND2	protein_coding	3.16821	0.0429457	0.983966	6.8944e-07
1599	ENSG00000117592	FDX1	protein_coding	0.512232	0.00165586	0.983269	6.83487e-05
1600	ENSG00000114735	PRDX6	protein_coding	-0.277734	0.00782277	0.982196	4.27431e-05
1601	ENSG00000132016	DVL2	protein_coding	0.272712	1.13798e-07	0.981994	0.0258537
1602	ENSG00000211455	RNASEH2C	protein_coding	-0.22236	6.64297e-05	0.980637	8.75901e-05
1603	ENSG00000125434	STK38L	protein_coding	-1.96019	0.00678932	0.978982	0.000596235
1604	ENSG00000204381	TMED4	protein_coding	0.426023	1.97556e-07	0.978146	0.0155303
1605	ENSG00000130818	RNF181	protein_coding	-0.105965	0.00267061	0.976964	7.86771e-06
1606	ENSG00000182551	AIMP1	protein_coding	-0.260068	0.00125666	0.976913	0.000198304
1607	ENSG00000165898	BMP4	protein_coding	-0.187864	0.0107455	0.976825	8.41003e-05
1608	ENSG00000179958	ADI1	protein_coding	0.587021	1.76306e-05	0.976434	0.00128739
1609	ENSG00000131238	RIN2	protein_coding	-0.13595	4.9553e-06	0.97366	6.30223e-06
1610	ENSG00000160688	CST3	protein_coding	-0.168421	0.00587513	0.973505	1.53789e-07
1611	ENSG00000145780	MTHFD2L	protein_coding	0.459405	0.000260354	0.97225	0.00136198
1612	ENSG00000166226	PPT1	protein_coding	1.69795	0.000107309	0.972092	0.00084046
1613	ENSG00000135205	FLAD1	protein_coding	1.06979	0.000206446	0.97058	0.0330927
1614	ENSG00000168495	FEM1C	protein_coding	1.30611	0.0287209	0.970579	0.000339177
1615	ENSG00000108961	TMEM208	protein_coding	0.15047	0.0288233	0.968242	7.87378e-05
1616	ENSG00000115109	MEIS1	protein_coding	0.488434	0.00313851	0.968181	0.00027501
1617	ENSG00000134697	HSD17B8	protein_coding	-0.618086	0.00179843	0.968109	1.36382e-05
1618	ENSG00000159377	EPB41L5	protein_coding	1.78517	0.000369076	0.96714	4.62735e-07
1619	ENSG00000130726	ENAH	protein_coding	-0.306152	0.00167232	0.965002	0.000243683
1620	ENSG00000196141	PSMB4	protein_coding	0.892963	3.60577e-06	0.964784	9.29016e-05
1621	ENSG00000113916	TRIM28	protein_coding	0.515131	0.000184561	0.964459	0.00802305
1622	ENSG00000152683	SPATS2L	protein_coding	-1.78013	0.00182931	0.964451	6.47587e-09
1623	ENSG00000069849	SSR1	protein_coding	-0.371008	0.00201394	0.964069	1.08438e-06
1624	ENSG00000055208	KCTD3	protein_coding	0.176916	0.00198902	0.961987	1.41459e-05
1625	ENSG00000125285	ZNF207	protein_coding	0.179376	1.96258e-08	0.961799	0.0474309
1626	ENSG00000153113	SOX21	protein_coding	4.77519	1.80536e-08	0.961029	0.000338795
1627	ENSG00000125454	FAM200A	protein_coding	-0.510169	0.0305586	0.960903	0.000257552
1628	ENSG00000145901	PRKAB1	protein_coding	-0.066495	0.0137715	0.959349	2.32069e-05
1629	ENSG00000119523	NOX1	protein_coding	0.46761	0.000155826	0.958599	1.98524e-07
1630	ENSG00000166224	EBF3	protein_coding	1.34417	0.0118463	0.957946	1.65539e-06
1631	ENSG00000029993	SPINT1	protein_coding	0.170494	0.00241273	0.957499	0.00624542
1632	ENSG00000081721	SGPL1	protein_coding	-0.886128	0.00547029	0.957151	2.20678e-07
1633	ENSG00000117298	POLR2J3	protein_coding	-0.195925	0.00509974	0.95629	0.00617711
1634	ENSG00000215440	BNIP1	protein_coding	0.23099	0.00410418	0.956161	0.00829959
1635	ENSG00000152256	PTPN9	protein_coding	-0.161215	0.0300981	0.955992	0.013915
1636	ENSG00000156172	NPEPL1	protein_coding	-1.80061	0.00686209	0.955561	0.00098186
1637	ENSG00000134824	ZNF284	protein_coding	-1.00652	0.0113972	0.955401	0.0422501
1638	ENSG00000159023	C8orf37	protein_coding	1.13597	0.000420275	0.955139	0.0369209
1639	ENSG00000167118	FADS2	protein_coding	1.21661	0.0461674	0.95457	2.08021e-06
1640	ENSG00000197471	EPB41	protein_coding	1.27307	0.0015739	0.954332	0.0212651
1641	ENSG00000088826	URM1	protein_coding	0.494474	0.000154602	0.953877	0.001667
1642	ENSG00000163083	CHST7	protein_coding	0.0428416	0.0305322	0.953817	0.0426826
1643	ENSG00000171310	SMOX	protein_coding	-1.63434	0.000378422	0.953805	0.00368009
1644	ENSG00000167088	AGPAT2	protein_coding	-0.412585	1.26627e-11	0.953613	6.01088e-06
1645	ENSG00000101096	SNRPD1	protein_coding	1.52787	0.0207969	0.952128	0.0124206
1646	ENSG00000134330	NADK	protein_coding	0.350949	0.0090284	0.95193	8.81985e-05
1647	ENSG00000130741	ZNF649	protein_coding	-0.0910436	0.0333219	0.951598	3.81497e-08
1648	ENSG00000132676	STYX	protein_coding	0.201678	0.00230944	0.949631	9.75278e-09
1649	ENSG00000126215	EIF2S3	protein_coding	0.526104	0.00156746	0.949447	0.0040487
1650	ENSG00000129187	COMMD5	protein_coding	0.090542	0.00276465	0.94937	4.21978e-06
1651	ENSG00000108733	DAP3	protein_coding	0.819389	0.00936814	0.949308	5.2448e-05
1652	ENSG00000204519	PEX12	protein_coding	1.31983	0.00418921	0.948387	0.000472767
1653	ENSG00000164929	LARP7	protein_coding	-0.0101408	0.00174925	0.947992	0.0332526
1654	ENSG00000170734	BAALC	protein_coding	3.48218	0.00333926	0.947492	0.000356419
1655	ENSG00000196182	POLH	protein_coding	-1.5184	0.00202465	0.945815	0.00033376
1656	ENSG00000059573	TFPI2	protein_coding	-1.97411	0.0042586	0.94574	3.25372e-05
1657	ENSG00000140299	HAPLN1	protein_coding	0.276976	0.00884994	0.944379	9.16481e-08
1658	ENSG00000242372	FNBP1L	protein_coding	-0.641344	0.033771	0.943566	2.60509e-06
1659	ENSG00000139370	WDR61	protein_coding	0.250671	0.00508086	0.943357	1.74331e-05
1660	ENSG00000171302	HIGD2A	protein_coding	0.344299	4.57038e-05	0.94112	5.46376e-06
1661	ENSG00000101972	VASH2	protein_coding	1.30763	0.0356104	0.940938	0.000179374
1662	ENSG00000114686	CANT1	protein_coding	-0.837441	0.00597474	0.94026	4.76846e-09
1663	ENSG00000135547	STAG2	protein_coding	0.460243	1.72738e-08	0.940061	0.0233728
1664	ENSG00000134986	CTNNA1	protein_coding	-0.184289	1.5885e-06	0.938221	0.0130088
1665	ENSG00000100968	EIF5B	protein_coding	0.735932	0.0280434	0.937389	0.0283856
1666	ENSG00000106077	DOT1L	protein_coding	0.328667	0.00361062	0.93683	0.00013327
1667	ENSG00000127946	NFATC4	protein_coding	-2.29255	0.0218419	0.936366	0.0214841
1668	ENSG00000108578	ABHD11	protein_coding	0.908077	0.00232153	0.936273	1.11844e-06
1669	ENSG00000175482	PRR14	protein_coding	-0.0955281	9.00676e-08	0.934864	0.000716727
1670	ENSG00000027001	DPY30	protein_coding	0.120171	0.00352453	0.934547	5.75379e-05
1671	ENSG00000072110	MIPEP	protein_coding	1.45055	8.23461e-09	0.934063	0.0279077
1672	ENSG00000149357	C19orf53	protein_coding	0.178274	0.0176192	0.933628	2.27819e-05
1673	ENSG00000087995	LAMTOR1	protein_coding	-0.297061	0.0117983	0.933102	1.09795e-05
1674	ENSG00000114670	METTL2A	protein_coding	0.859991	0.0122847	0.932812	0.0199142
1675	ENSG00000157107	STX8	protein_coding	0.0463687	0.00289322	0.932239	1.48289e-05
1676	ENSG00000128309	PRADC1	protein_coding	-0.428395	2.66583e-06	0.932133	0.000291983
1677	ENSG00000135926	FCHO2	protein_coding	-1.03487	0.00116789	0.93152	0.0088922
1678	ENSG00000168003	TMBIM1	protein_coding	-3.03196	0.00553227	0.931266	1.82158e-05
1679	ENSG00000169242	CASP10	protein_coding	0.656499	0.00287225	0.930826	0.00652689
1680	ENSG00000101464	DUSP15	protein_coding	1.06195	0.00531972	0.928986	1.32361e-05
1681	ENSG00000093010	TMA16	protein_coding	-0.144914	0.000120954	0.928473	0.000112145
1682	ENSG00000119725	TRIM48	protein_coding	0.902056	0.000365898	0.927445	0.000278914
1683	ENSG00000267855	SLC25A5	protein_coding	0.0268352	9.23068e-08	0.927346	0.000119434
1684	ENSG00000132842	RPS6KA1	protein_coding	0.890067	0.00182512	0.926929	1.80294e-06
1685	ENSG00000176845	NDUFA7	protein_coding	1.37136	0.000550306	0.926323	0.0236272
1686	ENSG00000169857	METRNL	protein_coding	-1.56443	0.0131824	0.924638	6.09845e-05
1687	ENSG00000049245	AVEN	protein_coding	-0.584201	3.49863e-05	0.923901	0.000175031
1688	ENSG00000178053	CHPT1	protein_coding	0.173587	0.00101136	0.922597	0.0182383
1689	ENSG00000102871	CDO1	protein_coding	1.31707	8.40938e-08	0.919914	0.000613077
1690	ENSG00000182973	ALDH9A1	protein_coding	0.186529	8.13131e-05	0.919571	6.93357e-08
1691	ENSG00000169045	CNOT10	protein_coding	0.694827	0.000550604	0.91832	5.51276e-05
1692	ENSG00000132581	ARRDC4	protein_coding	-0.43154	0.0380772	0.916088	1.06534e-06
1693	ENSG00000256045	RBBP7	protein_coding	-0.057565	0.000366387	0.91474	0.0261922
1694	ENSG00000184432	NSA2	protein_coding	-0.300937	0.00185397	0.914594	1.10231e-07
1695	ENSG00000213999	TP53RK	protein_coding	0.204236	0.0182155	0.914524	0.0249018
1696	ENSG00000167840	MTRNR2L10	protein_coding	1.23236	0.0337501	0.91423	0.000699092
1697	ENSG00000196743	MEF2B	protein_coding	-0.916259	0.0488091	0.913836	6.35819e-05
1698	ENSG00000144028	EDNRB	protein_coding	-0.11859	8.9353e-06	0.913726	0.00250146
1699	ENSG00000116649	SNRNP200	protein_coding	0.682472	0.000201607	0.913685	0.000120458
1700	ENSG00000137076	VGLL4	protein_coding	-0.44075	0.000647923	0.911164	0.00179481
1701	ENSG00000159596	SRM	protein_coding	0.800453	0.00195037	0.91064	4.72522e-09
1702	ENSG00000072736	FOXF2	protein_coding	-1.08087	8.3121e-05	0.910298	0.000833892
1703	ENSG00000088727	UBE2D4	protein_coding	0.292979	0.00416765	0.908818	0.00395557
1704	ENSG00000149136	COPE	protein_coding	0.40468	0.000102519	0.907355	2.5775e-05
1705	ENSG00000125450	WIPF1	protein_coding	-0.0285768	0.0094622	0.907163	3.51745e-07
1706	ENSG00000124299	NUP85	protein_coding	0.597414	0.0035641	0.906971	3.23165e-05
1707	ENSG00000178904	PGM1	protein_coding	0.585485	5.47917e-05	0.906963	0.0021354
1708	ENSG00000104756	WRAP73	protein_coding	0.1763	0.000179659	0.906306	0.000948236
1709	ENSG00000104324	GATA6	protein_coding	-1.29281	0.00101382	0.90599	0.0148842
1710	ENSG00000149499	NGLY1	protein_coding	0.750972	0.0364846	0.904535	2.952e-05
1711	ENSG00000142039	MSTO1	protein_coding	0.552885	0.00134688	0.902651	8.27e-06
1712	ENSG00000116691	CCDC97	protein_coding	1.19149	6.06258e-06	0.901431	0.000340623
1713	ENSG00000128567	ETFA	protein_coding	0.207785	0.0419212	0.901219	0.0138658
1714	ENSG00000132780	MIIP	protein_coding	1.27188	1.75783e-07	0.900952	0.00499328
1715	ENSG00000147677	PODXL	protein_coding	2.7882	5.9302e-05	0.90063	3.42753e-07
1716	ENSG00000099795	NASP	protein_coding	1.2641	0.00258068	0.900271	0.00472502
1717	ENSG00000115750	EIF3H	protein_coding	0.577387	0.00649304	0.900088	5.06436e-06
1718	ENSG00000169621	NDUFB7	protein_coding	0.479598	0.00127711	0.899455	0.0073356
1719	ENSG00000111640	TAF1B	protein_coding	0.99705	0.00652793	0.899321	0.000714413
1720	ENSG00000163870	APLF	protein_coding	-1.6881	0.00984071	0.899074	1.97344e-10
1721	ENSG00000064545	TPRA1	protein_coding	-0.498274	0.0383247	0.897964	6.28672e-05
1722	ENSG00000129515	SIKE1	protein_coding	-0.241591	0.00213409	0.896792	6.66034e-05
1723	ENSG00000124006	RGS2	protein_coding	1.96443	0.000291747	0.896758	0.0013483
1724	ENSG00000165240	SNX6	protein_coding	-1.05631	0.000311596	0.896336	0.000401342
1725	ENSG00000138594	OBSL1	protein_coding	0.966123	0.000129315	0.896147	4.69664e-05
1726	ENSG00000071127	EIF2B2	protein_coding	-0.396979	2.99097e-07	0.895773	1.15306e-06
1727	ENSG00000068028	FIGNL1	protein_coding	0.0467215	0.0248454	0.894767	8.38384e-07
1728	ENSG00000094880	WDR1	protein_coding	-1.79297	0.0292988	0.894533	7.59547e-08
1729	ENSG00000162396	RCBTB2	protein_coding	-0.293832	0.00202862	0.89422	6.07685e-06
1730	ENSG00000174444	CDC23	protein_coding	0.27292	0.046294	0.893951	2.85077e-05
1731	ENSG00000174130	PARS2	protein_coding	1.03998	0.0441004	0.893793	0.0348307
1732	ENSG00000100462	LRIG3	protein_coding	-1.54107	0.00217563	0.893257	0.000414007
1733	ENSG00000137193	PRMT5	protein_coding	0.732045	0.00690426	0.893003	0.0135502
1734	ENSG00000038002	RUNX2	protein_coding	0.613996	7.70217e-06	0.892864	0.00176556
1735	ENSG00000099256	NOS2	protein_coding	0.938001	7.1252e-05	0.892679	0.00125309
1736	ENSG00000160191	SLC29A1	protein_coding	0.614854	0.0369692	0.892066	0.00644881
1737	ENSG00000168404	PDE9A	protein_coding	1.67637	0.000194854	0.89148	0.00918935
1738	ENSG00000117748	SNAI1	protein_coding	0.558273	2.36707e-05	0.891456	6.84809e-05
1739	ENSG00000113384	MLKL	protein_coding	-1.17599	0.0204136	0.890994	2.91253e-10
1740	ENSG00000133027	GOLPH3	protein_coding	-0.525129	0.0309973	0.889374	7.24384e-05
1741	ENSG00000111229	SYNGR2	protein_coding	-0.00617212	0.0209282	0.888288	7.08073e-05
1742	ENSG00000136270	NOC3L	protein_coding	0.0275305	9.57015e-08	0.887889	9.1095e-06
1743	ENSG00000168090	PRPF3	protein_coding	0.615041	0.00619229	0.887706	2.07799e-06
1744	ENSG00000111639	SP3	protein_coding	0.266814	0.000384799	0.88627	8.05259e-05
1745	ENSG00000106263	CCDC151	protein_coding	-0.814492	1.82326e-05	0.886236	0.000260506
1746	ENSG00000143036	EIF3B	protein_coding	0.760788	0.0122052	0.885361	0.0105525
1747	ENSG00000136816	GALNS	protein_coding	-0.402464	0.00540512	0.883314	6.28029e-07
1748	ENSG00000105185	ZNF516	protein_coding	-0.137659	0.00341979	0.88306	1.36321e-06
1749	ENSG00000132846	SUPT4H1	protein_coding	-0.387969	5.99191e-07	0.88301	0.00664191
1750	ENSG00000141985	ZBED3	protein_coding	-1.06	0.0488415	0.881912	2.18067e-05
1751	ENSG00000010539	ZNF330	protein_coding	-0.360749	0.0109612	0.881893	1.13318e-07
1752	ENSG00000105655	TRAFD1	protein_coding	0.185848	7.72866e-07	0.879251	0.012202
1753	ENSG00000198435	ZNF525	protein_coding	0.414291	1.25823e-06	0.87884	0.0404525
1754	ENSG00000114125	ISYNA1	protein_coding	3.03087	0.000408258	0.878201	3.70633e-05
1755	ENSG00000088888	NRARP	protein_coding	3.2527	0.00904989	0.877556	0.000289393
1756	ENSG00000183580	ZNF766	protein_coding	-0.309426	0.000958059	0.87667	0.00818122
1757	ENSG00000170836	FBXL7	protein_coding	-1.87956	0.00219251	0.876143	6.64518e-05
1758	ENSG00000105486	JTB	protein_coding	-0.162147	2.6681e-06	0.876094	0.0100654
1759	ENSG00000128284	PPM1D	protein_coding	0.90083	0.000529188	0.875625	0.0276987
1760	ENSG00000172809	LIG1	protein_coding	1.06561	0.00290949	0.875249	0.000163522
1761	ENSG00000170860	TOMM7	protein_coding	0.700915	0.000422706	0.875129	7.31343e-05
1762	ENSG00000054116	APOL3	protein_coding	-2.38554	0.000387862	0.874693	6.45852e-05
1763	ENSG00000104824	TRAPPC3	protein_coding	-0.796222	0.000230899	0.873427	3.07375e-08
1764	ENSG00000066117	DLK1	protein_coding	4.72476	9.04617e-08	0.872946	0.000780933
1765	ENSG00000112081	SMARCD1	protein_coding	1.1226	0.0374844	0.871673	1.42296e-05
1766	ENSG00000067900	JMJD8	protein_coding	0.000111757	0.00847067	0.870364	0.000609242
1767	ENSG00000106636	CMC1	protein_coding	0.138093	0.000114399	0.86902	7.13642e-05
1768	ENSG00000198276	ZNF614	protein_coding	-0.0895298	0.000684981	0.868862	0.000583547
1769	ENSG00000070081	ZBTB26	protein_coding	-0.531119	0.000133548	0.866476	0.000396935
1770	ENSG00000136044	NUCB2	protein_coding	-1.61757	1.55601e-06	0.865436	1.04569e-05
1771	ENSG00000142669	PTPN18	protein_coding	-0.220332	8.39004e-07	0.864802	0.00167564
1772	ENSG00000221994	DPF3	protein_coding	-1.80907	0.040569	0.864655	0.000508744
1773	ENSG00000135763	APPL2	protein_coding	-1.90976	0.00206828	0.864594	0.000284674
1774	ENSG00000136522	SH3BGRL3	protein_coding	-3.04154	0.00402902	0.86426	4.91261e-05
1775	ENSG00000137700	PDGFRA	protein_coding	-0.966151	0.0143792	0.863088	1.76435e-05
1776	ENSG00000172687	GTF2B	protein_coding	-0.0974334	0.00320804	0.862565	0.033907
1777	ENSG00000109066	ZNF738	protein_coding	1.78556	6.01367e-05	0.861952	0.000205933
1778	ENSG00000166704	ZNF219	protein_coding	0.554451	0.0211868	0.861885	0.0130152
1779	ENSG00000141401	TMEM104	protein_coding	-1.25429	0.0016366	0.861473	0.0271883
1780	ENSG00000076242	PAK1IP1	protein_coding	0.621356	0.006709	0.86128	6.9592e-08
1781	ENSG00000147592	TIMM9	protein_coding	-0.384656	0.0474557	0.860955	0.0186147
1782	ENSG00000170469	ZKSCAN4	protein_coding	-1.0573	2.62452e-05	0.860757	0.000983646
1783	ENSG00000103051	LACTB2	protein_coding	-0.758491	0.00195591	0.860725	4.7589e-06
1784	ENSG00000011260	COG4	protein_coding	0.45594	0.00101515	0.859794	7.27517e-08
1785	ENSG00000149792	EIF3C	protein_coding	0.497482	0.000185822	0.859303	0.000475518
1786	ENSG00000119777	UTP18	protein_coding	1.0004	0.00780689	0.85927	1.23839e-05
1787	ENSG00000113569	SS18	protein_coding	0.21059	0.0183064	0.859111	0.000108061
1788	ENSG00000108590	MRPL49	protein_coding	-0.904746	0.000685665	0.859005	0.00723428
1789	ENSG00000008311	TMEM214	protein_coding	-0.285422	0.000416509	0.858881	0.019442
1790	ENSG00000158716	PDSS2	protein_coding	-0.786896	0.000210913	0.856361	0.0497485
1791	ENSG00000234444	DUSP23	protein_coding	-2.12368	0.0155701	0.855896	0.00275442
1792	ENSG00000084652	HERPUD2	protein_coding	0.406701	0.024867	0.855653	8.60591e-05
1793	ENSG00000137161	TXLNA	protein_coding	-0.378488	0.037275	0.853691	3.48172e-07
1794	ENSG00000152939	EIF2B1	protein_coding	0.0537827	0.0270361	0.852933	0.0481466
1795	ENSG00000109171	MARVELD2	protein_coding	0.697618	0.00244235	0.852267	2.1622e-06
1796	ENSG00000156398	NUDCD2	protein_coding	-0.169187	0.0201266	0.852186	0.00636501
1797	ENSG00000097046	FDXR	protein_coding	0.645046	5.39077e-06	0.850446	0.0231276
1798	ENSG00000137133	ATP6V1G1	protein_coding	0.233409	0.0338847	0.8504	0.00286144
1799	ENSG00000146192	METTL4	protein_coding	0.365027	0.0124244	0.850352	0.0394457
1800	ENSG00000105671	CDC7	protein_coding	1.24184	0.00528017	0.850269	0.000188868
1801	ENSG00000100601	PPP2R3B	protein_coding	1.41612	0.000642777	0.849639	4.54681e-06
1802	ENSG00000160201	MYO19	protein_coding	0.861127	0.000257366	0.849193	0.0409189
1803	ENSG00000111252	U2AF1	protein_coding	0.833976	0.00163732	0.848228	0.00646434
1804	ENSG00000068724	PSMG2	protein_coding	-0.0485766	1.28287e-07	0.847962	0.000902646
1805	ENSG00000129493	STOML2	protein_coding	0.481915	0.0223711	0.846205	0.000740984
1806	ENSG00000122863	KTI12	protein_coding	-0.116653	0.015391	0.84612	0.0265591
1807	ENSG00000186010	ALX4	protein_coding	-0.325527	0.0064918	0.845391	0.0028199
1808	ENSG00000118496	SRFBP1	protein_coding	-0.39328	0.00465056	0.845344	0.000356119
1809	ENSG00000117751	LRG1	protein_coding	1.70692	0.0484249	0.845327	1.1256e-06
1810	ENSG00000163466	CNOT2	protein_coding	0.323394	0.00353429	0.844276	3.63793e-07
1811	ENSG00000136869	TMEM11	protein_coding	-0.112081	2.57899e-06	0.843668	0.0450346
1812	ENSG00000130052	ARPC2	protein_coding	-0.803571	0.000415668	0.843554	0.00817305
1813	ENSG00000265808	TLR4	protein_coding	-4.58597	0.0182529	0.843474	6.02121e-10
1814	ENSG00000111450	SEC22B	protein_coding	-0.423443	0.00106282	0.843007	6.52703e-06
1815	ENSG00000102967	WRN	protein_coding	0.31735	3.67559e-09	0.842724	0.000404743
1816	ENSG00000138777	DOLK	protein_coding	-0.452456	0.00903002	0.842347	0.0001393
1817	ENSG00000048162	DHODH	protein_coding	1.86807	0.011643	0.842014	3.09537e-06
1818	ENSG00000105221	RGS16	protein_coding	1.16473	0.00284609	0.839746	0.000805661
1819	ENSG00000112308	TRIM16	protein_coding	-0.754503	0.00443782	0.839309	8.47636e-06
1820	ENSG00000213366	AKT2	protein_coding	0.527344	0.0221936	0.839187	0.00452994
1821	ENSG00000079462	GSTM2	protein_coding	-1.58906	5.21298e-08	0.837817	0.0176107
1822	ENSG00000112167	PLD2	protein_coding	-0.232216	0.00319834	0.837192	2.54105e-05
1823	ENSG00000116117	XPR1	protein_coding	0.427004	7.31244e-05	0.835744	0.0380551
1824	ENSG00000157483	C17orf80	protein_coding	0.697824	2.60321e-06	0.835494	0.0221618
1825	ENSG00000105849	MYO1E	protein_coding	-3.02557	0.00158072	0.83523	2.43673e-05
1826	ENSG00000164219	PARP3	protein_coding	-0.595715	0.0455019	0.834342	2.22916e-06
1827	ENSG00000169019	OSBPL11	protein_coding	-0.295871	0.011564	0.834083	0.00312822
1828	ENSG00000181830	TFB2M	protein_coding	0.220219	0.000356271	0.833269	5.07041e-05
1829	ENSG00000130724	PAK2	protein_coding	0.359008	2.76695e-06	0.83239	5.25849e-05
1830	ENSG00000126003	NDUFA2	protein_coding	0.290992	0.0201855	0.828155	0.00275188
1831	ENSG00000169972	ZNF665	protein_coding	1.28146	0.0146414	0.82691	0.000568529
1832	ENSG00000136527	ZNF562	protein_coding	0.256762	1.04725e-06	0.824987	7.91067e-07
1833	ENSG00000137574	EPHB3	protein_coding	3.52204	0.00350009	0.824416	3.48474e-05
1834	ENSG00000149600	MPZL3	protein_coding	-0.157437	0.0257697	0.824137	0.00150339
1835	ENSG00000120324	SLC39A7	protein_coding	-0.477606	0.00273745	0.823946	0.038457
1836	ENSG00000071082	COMMD7	protein_coding	-0.510077	0.00487306	0.823686	0.00438821
1837	ENSG00000140464	CNTNAP3B	protein_coding	0.764421	0.00816817	0.822576	0.00504925
1838	ENSG00000076321	ABT1	protein_coding	0.169979	0.000170367	0.821348	1.49381e-05
1839	ENSG00000230989	PDAP1	protein_coding	-0.172818	0.00112952	0.821276	0.00288039
1840	ENSG00000116954	HSBP1	protein_coding	0.754341	0.000590524	0.820736	2.28943e-05
1841	ENSG00000142961	RRAGC	protein_coding	-0.961035	2.61511e-05	0.819959	0.000685605
1842	ENSG00000070778	MOB3C	protein_coding	-1.67825	0.000245745	0.819009	0.014966
1843	ENSG00000144381	YIPF2	protein_coding	-0.56644	4.92853e-11	0.818874	1.09052e-06
1844	ENSG00000092330	NOTCH4	protein_coding	0.201675	0.0320004	0.818802	1.86128e-05
1845	ENSG00000135775	TINF2	protein_coding	-0.647225	0.0312907	0.818234	1.37846e-05
1846	ENSG00000131196	UBIAD1	protein_coding	0.179992	0.00849278	0.81776	0.0102073
1847	ENSG00000175193	RASSF4	protein_coding	0.656196	0.00245912	0.817403	2.42331e-06
1848	ENSG00000104980	NFE2	protein_coding	-0.952009	0.000335437	0.816768	0.000117317
1849	ENSG00000126903	TMEM223	protein_coding	-0.247296	1.12611e-08	0.816083	0.00152758
1850	ENSG00000143314	PCID2	protein_coding	-0.294208	0.00312647	0.815387	3.86937e-05
1851	ENSG00000125445	MRPL24	protein_coding	0.635624	8.39318e-05	0.81501	0.000360283
1852	ENSG00000196504	ITGB4	protein_coding	-0.799923	0.0129529	0.814486	3.81892e-06
1853	ENSG00000061273	MRPS7	protein_coding	1.09834	4.48763e-06	0.8139	0.00342403
1854	ENSG00000183214	SGSH	protein_coding	-0.357963	0.00398765	0.813783	0.0391494
1855	ENSG00000135912	PRPF40A	protein_coding	1.02435	9.82205e-05	0.813248	0.000235051
1856	ENSG00000187994	HDAC7	protein_coding	-1.15454	0.0141367	0.812892	0.0197202
1857	ENSG00000198912	MICA	protein_coding	-2.64058	0.0413099	0.812867	0.000120393
1858	ENSG00000177105	UNK	protein_coding	0.244062	2.2882e-06	0.810768	0.00178591
1859	ENSG00000127415	ZNRF2	protein_coding	0.156613	0.0268522	0.810768	0.0211999
1860	ENSG00000153006	FBXO36	protein_coding	0.122639	0.0079081	0.810498	1.06705e-05
1861	ENSG00000104529	RHOG	protein_coding	-1.46587	0.00256105	0.810469	8.36272e-05
1862	ENSG00000051108	IDUA	protein_coding	-0.917494	2.78763e-06	0.810435	0.000364277
1863	ENSG00000004487	SREK1IP1	protein_coding	-1.26686	7.49867e-06	0.810125	0.00198327
1864	ENSG00000168101	NAA10	protein_coding	0.11003	0.00273527	0.808105	0.00234545
1865	ENSG00000119616	NUDT16L1	protein_coding	0.387431	5.59495e-05	0.807682	1.25502e-05
1866	ENSG00000158457	VPS54	protein_coding	0.110763	0.000609978	0.807548	0.036636
1867	ENSG00000126088	ZBTB5	protein_coding	0.276786	0.00887594	0.80599	0.00012581
1868	ENSG00000142208	CDC42	protein_coding	-0.360825	0.00423743	0.804722	0.0026004
1869	ENSG00000084073	CCDC134	protein_coding	0.839417	0.0174905	0.804639	5.37055e-06
1870	ENSG00000112578	ZMPSTE24	protein_coding	-0.491334	0.00859458	0.803937	0.00497328
1871	ENSG00000129534	SCML2	protein_coding	0.567502	0.00462871	0.803662	0.00737051
1872	ENSG00000157045	MIS18BP1	protein_coding	0.739568	0.00120876	0.803098	8.57908e-05
1873	ENSG00000163806	FARS2	protein_coding	-0.066965	0.0475025	0.802602	0.0166852
1874	ENSG00000120458	OMA1	protein_coding	0.471948	0.0206252	0.802285	0.00237975
1875	ENSG00000129595	CD82	protein_coding	-1.892	0.029615	0.801621	0.0215449
1876	ENSG00000138674	PRDX1	protein_coding	-0.150073	0.00131769	0.801427	4.48592e-05
1877	ENSG00000143882	EPB41L4A	protein_coding	0.572898	0.00831596	0.801216	0.000229659
1878	ENSG00000110011	ATP6V1C2	protein_coding	0.508313	3.71415e-07	0.799889	9.32523e-07
1879	ENSG00000182986	C19orf44	protein_coding	-0.675333	0.00977662	0.799187	0.00792127
1880	ENSG00000099800	DNAJC4	protein_coding	-1.82807	2.17419e-07	0.799169	0.000566493
1881	ENSG00000198087	TIMM13	protein_coding	1.1709	0.00227716	0.798736	0.00313489
1882	ENSG00000135482	RTTN	protein_coding	-1.06014	0.00814882	0.798661	9.02501e-07
1883	ENSG00000153140	MRPL14	protein_coding	0.316027	0.0443617	0.797429	0.00103747
1884	ENSG00000197006	UBE2E3	protein_coding	-0.290527	0.00307336	0.797148	6.94282e-05
1885	ENSG00000180008	NUDT19	protein_coding	-0.884747	0.00127176	0.797144	0.000215735
1886	ENSG00000163159	CETN3	protein_coding	0.327277	0.0101572	0.796834	0.000142082
1887	ENSG00000213390	METTL9	protein_coding	-0.419118	0.000219989	0.796552	0.00817818
1888	ENSG00000128951	ARHGAP19	protein_coding	1.1454	0.000202079	0.796019	0.000162862
1889	ENSG00000107833	NOM1	protein_coding	0.0734981	0.0128397	0.795031	0.00460719
1890	ENSG00000151131	IFT46	protein_coding	-0.634606	0.000168388	0.793877	0.000760394
1891	ENSG00000108559	TFB1M	protein_coding	0.372873	0.00653302	0.793446	5.7893e-05
1892	ENSG00000152457	CCDC8	protein_coding	2.44262	0.000783738	0.791788	9.60719e-05
1893	ENSG00000131236	ERCC1	protein_coding	0.213011	8.6877e-05	0.791501	1.30281e-07
1894	ENSG00000100316	KDM3A	protein_coding	0.65705	0.00202857	0.791237	8.08627e-05
1895	ENSG00000166340	CAP1	protein_coding	-0.995315	3.12989e-06	0.790936	0.010107
1896	ENSG00000143418	MYNN	protein_coding	-0.450635	0.000796432	0.789268	5.25169e-05
1897	ENSG00000196705	PNRC2	protein_coding	0.374276	8.45696e-05	0.787208	0.00648368
1898	ENSG00000183513	SNAPC2	protein_coding	-0.0257623	0.0011709	0.786248	0.00156584
1899	ENSG00000164088	LRRC23	protein_coding	0.752909	0.0176355	0.785789	0.00210238
1900	ENSG00000136319	CLK2	protein_coding	0.507132	0.000590467	0.784101	0.000979908
1901	ENSG00000165527	C11orf24	protein_coding	-0.0523666	0.0101224	0.784096	0.000138365
1902	ENSG00000130816	TTC5	protein_coding	-0.7774	1.09106e-06	0.783793	0.0229265
1903	ENSG00000137513	ARF6	protein_coding	-0.453792	0.0116117	0.783348	0.000503614
1904	ENSG00000101220	NARS2	protein_coding	0.665251	0.00120529	0.782955	0.000207879
1905	ENSG00000109381	CWF19L2	protein_coding	0.344579	9.63836e-05	0.782741	7.63088e-07
1906	ENSG00000088682	CRCP	protein_coding	-0.21225	0.000115535	0.782348	0.000460151
1907	ENSG00000120278	TNFSF10	protein_coding	0.729066	0.00229437	0.78082	0.0496296
1908	ENSG00000165792	INHBE	protein_coding	-1.87539	0.0306408	0.779968	0.00361558
1909	ENSG00000172432	NEURL1B	protein_coding	-0.675815	0.0239305	0.779879	0.00106149
1910	ENSG00000103653	TMX2	protein_coding	0.521223	0.000117202	0.776559	1.34756e-05
1911	ENSG00000037749	TSFM	protein_coding	0.542772	0.00143292	0.776304	0.00384359
1912	ENSG00000169855	ZNF672	protein_coding	-0.124775	0.0369537	0.77616	0.0374076
1913	ENSG00000152443	MFAP3	protein_coding	-0.735479	0.0298033	0.776133	0.00352593
1914	ENSG00000183011	ZNF776	protein_coding	0.738014	0.0174327	0.774976	0.0136676
1915	ENSG00000100629	NAA38	protein_coding	-1.16345	0.00945391	0.773286	0.0135544
1916	ENSG00000149262	ABI3BP	protein_coding	-4.13903	0.00398245	0.771638	2.20698e-05
1917	ENSG00000036054	MEA1	protein_coding	-0.0930301	0.00776579	0.769976	1.23389e-05
1918	ENSG00000182325	TBC1D23	protein_coding	-0.919496	7.13085e-05	0.769159	0.00973336
1919	ENSG00000172456	PTPN1	protein_coding	-0.359974	0.00935704	0.767218	0.00391865
1920	ENSG00000153208	USF1	protein_coding	0.449019	1.15606e-05	0.767137	0.0189559
1921	ENSG00000213782	C1orf56	protein_coding	0.216846	0.0401942	0.76702	0.0068036
1922	ENSG00000161970	MERTK	protein_coding	2.52895	0.0312235	0.766772	0.00484213
1923	ENSG00000164039	DDX47	protein_coding	0.402966	5.32948e-05	0.766746	0.0071185
1924	ENSG00000178177	BDH2	protein_coding	-0.84552	0.00548435	0.766496	0.00129741
1925	ENSG00000033100	RPL15	protein_coding	0.295071	0.00595405	0.766303	0.00340172
1926	ENSG00000265241	CHPF2	protein_coding	-0.925265	0.000794193	0.765768	7.44144e-06
1927	ENSG00000100612	MPP4	protein_coding	-1.97384	0.0087714	0.7647	0.000714345
1928	ENSG00000130348	CEP57L1	protein_coding	-0.549908	0.0294699	0.763845	0.00692241
1929	ENSG00000118965	ADAT3	protein_coding	0.136449	6.51636e-06	0.762623	0.000976301
1930	ENSG00000167994	WDR35	protein_coding	0.997801	0.0473727	0.761685	0.0209761
1931	ENSG00000115275	ENPP1	protein_coding	0.502981	0.000802394	0.761023	6.78889e-05
1932	ENSG00000147123	CEP44	protein_coding	-0.488089	8.45242e-06	0.760696	0.000242729
1933	ENSG00000108883	MOGS	protein_coding	0.693479	0.00360471	0.760405	7.43958e-05
1934	ENSG00000186104	RAMP3	protein_coding	-0.983465	0.0157025	0.759805	0.0225842
1935	ENSG00000168038	EFTUD2	protein_coding	0.588739	0.0385505	0.759545	0.00784269
1936	ENSG00000150403	CYP2R1	protein_coding	-1.00739	0.00101223	0.759236	0.00164985
1937	ENSG00000176340	WDR70	protein_coding	-0.0495679	0.00010409	0.757597	0.00092911
1938	ENSG00000129347	DUS4L	protein_coding	-0.139029	9.25214e-08	0.75755	0.00221719
1939	ENSG00000144468	UTP20	protein_coding	0.0611134	0.00340661	0.757397	2.05943e-05
1940	ENSG00000165055	COX8A	protein_coding	1.03312	0.0409261	0.757177	0.000238906
1941	ENSG00000100577	MTCP1	protein_coding	-0.462477	2.27457e-06	0.756348	0.00327921
1942	ENSG00000164162	SCAMP4	protein_coding	0.0103974	0.00869575	0.756013	4.15517e-05
1943	ENSG00000142002	GANC	protein_coding	0.0983964	2.85633e-05	0.75213	0.000541207
1944	ENSG00000196531	KDM5A	protein_coding	-0.474545	0.00215766	0.751713	1.2976e-05
1945	ENSG00000163938	DPP9	protein_coding	-0.876421	0.000367766	0.751602	0.000563665
1946	ENSG00000159882	COL20A1	protein_coding	7.13551	0.0185796	0.750982	0.000740755
1947	ENSG00000116062	ZNF230	protein_coding	-1.01301	3.97247e-06	0.750419	0.00334642
1948	ENSG00000109606	POM121C	protein_coding	0.400208	0.000116397	0.750199	1.43048e-05
1949	ENSG00000135723	TCTA	protein_coding	-0.845483	0.0185205	0.748837	0.00653019
1950	ENSG00000186073	FHOD1	protein_coding	-1.18121	0.00572744	0.748416	0.000598413
1951	ENSG00000213064	ZNF678	protein_coding	0.548653	0.0376643	0.746246	0.0001774
1952	ENSG00000186665	LAMA1	protein_coding	3.41945	0.0329734	0.744221	0.000599346
1953	ENSG00000084754	PHOSPHO2	protein_coding	0.370638	0.000649985	0.743048	7.90443e-10
1954	ENSG00000197208	HADHA	protein_coding	0.791812	0.000148005	0.742437	0.049175
1955	ENSG00000168264	P2RY6	protein_coding	-1.33506	0.00663013	0.742172	0.000193273
1956	ENSG00000076641	ALG1	protein_coding	0.0670051	8.01271e-05	0.741869	0.00161375
1957	ENSG00000116898	SLC22A4	protein_coding	-2.28859	0.00219079	0.74168	0.00396999
1958	ENSG00000100258	TAT	protein_coding	0.171644	0.0462455	0.739629	0.00520249
1959	ENSG00000144233	SHARPIN	protein_coding	-0.0692165	0.0300014	0.739611	2.73384e-05
1960	ENSG00000116001	RIOK2	protein_coding	-0.3151	0.0138224	0.73953	0.00553995
1961	ENSG00000168036	LMF2	protein_coding	-0.352386	0.0411931	0.7392	1.07008e-05
1962	ENSG00000100372	AMMECR1L	protein_coding	-0.756468	0.00631248	0.739147	0.000645137
1963	ENSG00000101546	SLC25A17	protein_coding	0.566033	0.0106403	0.738465	0.000150369
1964	ENSG00000135917	RBFA	protein_coding	1.37061	4.11225e-06	0.737779	0.0459822
1965	ENSG00000181896	CCDC130	protein_coding	0.258037	0.00434561	0.734911	0.000335206
1966	ENSG00000164442	SPAG16	protein_coding	-0.126785	2.01147e-05	0.733833	0.0178598
1967	ENSG00000148950	C11orf54	protein_coding	-0.250016	0.0204596	0.73308	0.00834611
1968	ENSG00000262814	B4GALT5	protein_coding	0.241915	7.67319e-06	0.731955	0.00227272
1969	ENSG00000058799	GATM	protein_coding	2.37461	0.0277966	0.728865	0.000262279
1970	ENSG00000167202	ZNF440	protein_coding	0.451313	4.77324e-06	0.727337	0.013316
1971	ENSG00000084733	SDC2	protein_coding	-1.31489	0.000717187	0.727199	6.09576e-07
1972	ENSG00000110321	GPSM2	protein_coding	0.557182	0.000902161	0.72714	4.60889e-06
1973	ENSG00000115233	TBC1D2B	protein_coding	-2.05464	0.010665	0.726788	9.92271e-05
1974	ENSG00000116251	PSMD14	protein_coding	0.522104	0.000897651	0.725875	0.000790426
1975	ENSG00000087269	LRWD1	protein_coding	0.632855	0.00419988	0.725246	7.11628e-06
1976	ENSG00000254999	NOP14	protein_coding	0.453162	0.00967433	0.72472	0.000259492
1977	ENSG00000148429	KLRK1	protein_coding	2.09768	0.0301916	0.724599	0.000222588
1978	ENSG00000034533	BRK1	protein_coding	-1.01875	7.30089e-06	0.724286	7.15538e-05
1979	ENSG00000169714	FANCF	protein_coding	-0.223203	0.0127827	0.72407	6.87056e-06
1980	ENSG00000196839	THAP1	protein_coding	-0.187546	4.82513e-05	0.723045	0.0394513
1981	ENSG00000152944	BMP2K	protein_coding	-0.144286	0.00186803	0.72271	0.00137846
1982	ENSG00000147955	MRPL16	protein_coding	-0.024921	0.00774217	0.722092	0.00350921
1983	ENSG00000164237	GGN	protein_coding	-0.268239	0.0390372	0.721166	0.0183361
1984	ENSG00000152433	CMBL	protein_coding	1.46891	0.00393145	0.720037	0.00875101
1985	ENSG00000141428	FREM1	protein_coding	0.940974	0.00156127	0.718718	0.00100674
1986	ENSG00000152439	ARL5A	protein_coding	0.477383	0.00656856	0.718703	0.00239592
1987	ENSG00000168916	BBS4	protein_coding	-0.281879	0.00460691	0.718411	0.00967546
1988	ENSG00000178691	ZNF773	protein_coding	0.768649	0.0138842	0.718176	0.000756388
1989	ENSG00000068438	ZNF608	protein_coding	1.27761	0.000147854	0.717856	9.13133e-06
1990	ENSG00000174796	SUZ12	protein_coding	0.401545	7.99257e-06	0.717764	3.74883e-05
1991	ENSG00000062582	THAP6	protein_coding	-2.4251	0.00217128	0.717157	0.00485535
1992	ENSG00000140367	MRPS24	protein_coding	0.462298	0.000324253	0.716137	0.00306382
1993	ENSG00000108465	UBE2Q2	protein_coding	-0.649464	0.00875626	0.715869	0.0166486
1994	ENSG00000152904	PIP5K1A	protein_coding	0.514671	0.0413717	0.715855	1.4e-06
1995	ENSG00000087087	IRF3	protein_coding	-0.270227	0.00065145	0.715775	0.00295397
1996	ENSG00000119471	AATF	protein_coding	0.290253	0.00955556	0.714803	0.00299401
1997	ENSG00000101363	ZNF763	protein_coding	0.605183	8.54368e-05	0.712957	0.000495604
1998	ENSG00000165819	AKAP13	protein_coding	-0.388096	0.000797842	0.709975	0.00580414
[truncated: 1,719 more rows]
