# Supplementary material for: PITAR, a DNA damage-inducible Cancer/Testis long noncoding RNA, inactivates p53 by binding and stabilizing TRIM28 mRNA
Source: bioRxiv preprint, doi:10.1101/2023.04.11.536370, version 2 (2024-04-01)
Supplement: Supplementary Table 4.xlsx [file 536370_file06.xlsx]

## Sheet: Supplementary Table 4
Supplementary Table 4: Differentially expressed Genes in GBM - Normal
Sr. No	Gene_name	log2 fold change (GBM-Normal)#	p value*
1	RRM2	7.81111	8.81299e-37
2	PA2G4P4	2.53187	1.31083e-33
3	UBE2C	8.02837	4.14354e-33
4	NDC80	7.0889	1.14266e-31
5	KIF20A	7.40509	1.21433e-31
6	DLGAP5	8.13353	1.91757e-31
7	NCAPG	6.92371	4.34489e-31
8	CEP55	5.9064	9.66236e-31
9	GNAI3	2.07072	2.41662e-30
10	CMTM3	3.33282	3.33519e-30
11	CCNB2	7.36043	4.07974e-30
12	PBK	7.85744	4.58878e-30
13	CDK2	3.66501	1.04178e-29
14	MYBL2	8.41901	1.3559e-29
15	BUB1	6.34616	1.52607e-29
16	AURKB	7.52268	5.66117e-29
17	TOP2A	7.75376	3.70753e-28
18	ASF1B	5.98742	4.84916e-28
19	MELK	7.56845	5.37476e-28
20	ZNF90	4.08881	1.52404e-27
21	WEE1	4.28541	2.08274e-27
22	HJURP	6.49223	2.2957e-27
23	ATP5EP2	3.80385	3.32255e-27
24	F2R	4.709	5.89349e-27
25	CENPA	6.15259	2.02415e-26
26	KIF4A	5.78876	1.52206e-25
27	RPS27	4.0983	3.06346e-25
28	TROAP	6.80851	3.50717e-25
29	NUSAP1	5.65467	5.90141e-25
30	BIRC5	6.90245	1.63666e-24
31	EIF4EBP1	3.60703	1.6794e-24
32	CDC45	7.37679	3.29086e-24
33	EPR1	6.90793	5.9423e-24
34	NRM	3.33783	7.04812e-24
35	CENPK	5.6051	1.01668e-23
36	KIAA0101	6.31091	1.41767e-23
37	PABPC3	2.59531	1.44058e-23
38	TGIF1	2.97137	1.5809e-23
39	ACTL6A	2.94392	3.92921e-23
40	EZH2	4.81716	5.81047e-23
41	E2F8	6.26556	6.52666e-23
42	RP2	2.53627	7.85021e-23
43	NEDD1	2.34061	1.18274e-22
44	IQGAP2	4.90785	1.52949e-22
45	OIP5	5.48265	1.97351e-22
46	FAM64A	7.01667	2.36522e-22
47	CDCA2	5.96517	3.64713e-22
48	KIF18A	5.29917	4.73863e-22
49	TGFB1I1	3.67208	6.19169e-22
50	KIF2C	5.37585	6.89604e-22
51	VIM	3.50264	6.98324e-22
52	MAPRE1	1.63487	1.02672e-21
53	SYDE1	2.63443	1.67597e-21
54	KIF14	5.68865	2.30119e-21
55	RAB42	4.99067	3.02554e-21
56	KIFC1	5.89901	4.01724e-21
57	MLF1IP	4.9567	5.00757e-21
58	GTSE1	5.42092	6.65411e-21
59	CDK1	4.94762	7.11718e-21
60	E2F7	5.44086	8.12349e-21
61	FAM111B	5.97785	1.1452e-20
62	CHST14	2.55133	1.3312e-20
63	SGOL1	5.98245	1.45649e-20
64	PTBP1	2.14978	1.77399e-20
65	APH1A	1.55686	1.77587e-20
66	BUB1B	5.28206	1.99118e-20
67	PGM2	1.79231	2.11683e-20
68	CDCA7	4.3834	2.19461e-20
69	RAD51AP1	3.94317	3.34851e-20
70	BTN2A2	2.18431	4.28671e-20
71	GPX7	3.07086	5.70865e-20
72	SHOX2	7.48403	8.4001e-20
73	IKBIP	3.08271	8.99589e-20
74	SPARC	3.1609	1.24267e-19
75	CASP6	2.66291	1.50719e-19
76	RBBP8	2.62735	1.67163e-19
77	C7orf49	1.75193	2.17957e-19
78	NUF2	5.18376	2.53666e-19
79	C1orf144	1.5735	2.74625e-19
80	RIT1	1.68464	2.94216e-19
81	SRBD1	1.59978	3.27959e-19
82	NR5A2	4.89497	3.71038e-19
83	GNG5	2.65209	3.92354e-19
84	FOXM1	4.91466	4.5457e-19
85	PKMYT1	5.14579	4.87873e-19
86	ESCO2	5.51741	4.93317e-19
87	HMG20B	1.94904	6.22637e-19
88	KIF23	4.71349	7.81656e-19
89	CHEK2	3.1063	8.0605e-19
90	FAM54A	3.9934	9.02241e-19
91	SMC4	2.95761	1.18409e-18
92	ORC1L	4.63146	1.33104e-18
93	RAD51	4.4451	1.40342e-18
94	TTK	5.70829	2.0547e-18
95	CMTM6	2.04484	2.18183e-18
96	NAA38	1.57399	2.47265e-18
97	DYNLT1	2.94067	2.50237e-18
98	UMPS	1.45232	2.74913e-18
99	SERPINH1	3.81568	2.80714e-18
100	HYAL2	2.29431	2.85698e-18
101	HOXC4	4.88921	3.2468e-18
102	C14orf19	2.68727	3.83957e-18
103	MKI67	5.76704	3.869e-18
104	IDH1	2.58852	4.06441e-18
105	SKA1	5.07447	4.4346e-18
106	CCNA2	4.20161	4.53132e-18
107	DTL	4.99545	4.79572e-18
108	NOX4	5.08402	6.39392e-18
109	TSPAN6	3.11476	6.67481e-18
110	NME4	2.05558	7.03973e-18
111	SEC61A1	1.74539	7.12093e-18
112	COL4A1	4.95763	8.50129e-18
113	ESPL1	4.99029	8.94348e-18
114	NUP160	1.85115	1.00672e-17
115	CD276	2.70314	1.03878e-17
116	GNB2L1	2.00291	1.34368e-17
117	C20orf72	1.78424	1.9562e-17
118	GPR82	5.47129	2.27459e-17
119	APOBEC3B	5.30248	2.72611e-17
120	TNFRSF19	3.84842	2.73232e-17
121	BTG1	2.01812	2.93606e-17
122	C11orf82	3.68432	3.29518e-17
123	NUP37	2.26327	3.35907e-17
124	SLC39A1	1.92831	3.46603e-17
125	HMMR	4.79015	3.62347e-17
126	YBX1	2.08909	4.04876e-17
127	DAP	1.68302	4.16058e-17
128	CDC25C	5.82232	4.24236e-17
129	PPIL5	2.74165	4.82531e-17
130	FKBP10	2.88458	4.90373e-17
131	C1orf112	2.19706	4.95085e-17
132	GART	1.43264	5.43086e-17
133	E2F2	5.46582	5.55901e-17
134	CDCA8	4.32428	5.71765e-17
135	HDAC1	1.65467	6.02314e-17
136	CCDC80	3.49856	7.17147e-17
137	IGFBP2	5.59878	1.07939e-16
138	LOXL3	2.44447	1.27084e-16
139	HAT1	1.56157	1.49615e-16
140	RPN2	1.58554	1.6774e-16
141	EDARADD	2.82966	1.74252e-16
142	ITPRIPL1	3.24068	1.98736e-16
143	XRN2	1.53337	2.03725e-16
144	MYD88	2.42474	2.11562e-16
145	BCL2L12	3.01601	2.22445e-16
146	PCNA	2.56388	2.24666e-16
147	NUBP1	1.39404	2.39496e-16
148	PL-5283	1.99772	2.66666e-16
149	SPC25	4.82805	2.8275e-16
150	TP53I3	2.62933	3.26403e-16
151	IKBKB	1.40097	3.47948e-16
152	CASC5	5.23163	3.73257e-16
153	EIF4A3	1.23159	3.84346e-16
154	ERI1	2.21651	4.06984e-16
155	SLC35A4	1.27765	4.76625e-16
156	MDK	4.07083	5.06314e-16
157	NECAP2	2.08733	5.75665e-16
158	PTTG1IP	1.72909	5.82287e-16
159	CKAP2L	4.44243	5.87857e-16
160	CDC20	4.63228	5.9244e-16
161	TRIM5	3.08134	5.96403e-16
162	PRIM2	2.20126	6.04101e-16
163	PLEKHF2	1.87892	6.36791e-16
164	MYCBP	2.39972	6.52082e-16
165	ASPM	5.06966	6.94946e-16
166	DBR1	1.12339	7.12652e-16
167	SMO	2.92091	7.89798e-16
168	TCF19	3.31157	8.15625e-16
169	PRKD3	1.80983	9.31869e-16
170	ANXA5	2.88559	9.54596e-16
171	FAM60A	3.80212	9.78404e-16
172	HEATR2	1.87472	1.17088e-15
173	GNG12	2.4655	1.17202e-15
174	CTPS2	1.66267	1.23366e-15
175	ENPEP	4.12461	1.3253e-15
176	WDR76	3.21398	1.3923e-15
177	CENPM	4.35802	1.4778e-15
178	PTTG1	3.70987	1.50187e-15
179	NCAPH	4.24169	1.59732e-15
180	STK38	1.85198	1.68054e-15
181	NUP205	1.73145	1.69555e-15
182	COQ2	1.7163	2.04187e-15
183	AURKA	3.27435	2.26054e-15
184	PDIA4	2.57578	2.56383e-15
185	NEDD4	2.27031	2.93062e-15
186	RHOC	2.43654	3.01582e-15
187	ARHGAP11A	3.37199	3.52457e-15
188	TUBA1C	4.23188	3.5285e-15
189	SOAT1	2.08589	3.57053e-15
190	POLE2	4.49216	3.67002e-15
191	CKLF	2.43174	3.72491e-15
192	SHCBP1	3.25578	4.11862e-15
193	USP3	1.78736	4.15904e-15
194	ANGPT2	4.16379	4.28056e-15
195	REEP4	1.95585	4.66795e-15
196	KIAA1949	1.97838	4.85801e-15
197	RELA	1.14373	4.8828e-15
198	TPX2	3.8513	5.33772e-15
199	FANCD2	3.37969	5.73419e-15
200	CLDN7	3.84074	6.0845e-15
201	ERCC6L	3.8548	6.51547e-15
202	RNPEP	1.4102	6.54687e-15
203	PPP4C	1.77378	6.73792e-15
204	ABCB7	1.42135	6.74899e-15
205	PLEKHG2	2.92899	7.05699e-15
206	MCM10	5.11548	7.63868e-15
207	TMEM194A	1.9158	7.70303e-15
208	TP53	2.64381	7.74713e-15
209	IFNAR2	1.41769	7.80467e-15
210	CARD8	1.54844	7.86871e-15
211	HAUS8	2.36137	8.18362e-15
212	TTC27	1.24134	8.56477e-15
213	AK2	1.91226	8.93982e-15
214	CLIC1	3.30802	9.97923e-15
215	H3F3A	2.05964	1.03951e-14
216	JUB	3.12469	1.04128e-14
217	CKS2	3.75027	1.10311e-14
218	PTK7	2.57296	1.12404e-14
219	USP39	1.18876	1.12787e-14
220	HSD17B10	1.73763	1.22824e-14
221	DSCC1	2.15338	1.29527e-14
222	KDELC1	2.66216	1.29936e-14
223	FAM111A	2.57887	1.37932e-14
224	ZNF207	0.990812	1.41792e-14
225	GLA	1.73555	1.62432e-14
226	TRIP10	2.11259	1.70133e-14
227	GJC1	2.38602	1.86589e-14
228	MUTED	1.5607	1.98357e-14
229	IL10RB	2.05838	2.02892e-14
230	GAL3ST4	2.47723	2.05543e-14
231	PYGL	3.2273	2.10739e-14
232	FKBP7	2.66301	2.15943e-14
233	PPPDE1	1.90711	2.24383e-14
234	GSG2	4.18787	2.34171e-14
235	ZNF20	1.92021	2.42838e-14
236	LMAN2L	1.44727	3.12804e-14
237	DCAF13	1.65678	3.14022e-14
238	LOC374443	2.46468	3.15744e-14
239	RP9	1.74069	3.58695e-14
240	MACC1	4.15381	3.66762e-14
241	RPLP0	2.42373	4.15074e-14
242	FAM125A	1.78438	4.18931e-14
243	TNC	4.19744	4.28838e-14
244	ALG8	1.30477	4.5559e-14
245	DLEU1	2.81342	4.67073e-14
246	EXO1	4.23262	4.7179e-14
247	CNN3	2.41541	4.78526e-14
248	SFT2D3	1.33545	4.91948e-14
249	CPSF3	1.21579	5.10996e-14
250	ALG3	1.49005	5.29471e-14
251	DISP1	1.71672	5.41186e-14
252	GSC	5.83557	5.48501e-14
253	UBTD2	1.42766	5.56396e-14
254	DTYMK	2.57483	5.63622e-14
255	RCC1	4.04823	6.3484e-14
256	TNIP2	1.61204	6.80618e-14
257	DDX39	2.01812	7.20214e-14
258	IGF2BP3	5.2172	7.80822e-14
259	NXT1	2.50365	8.44824e-14
260	SEC11A	1.83612	8.86609e-14
261	FAM86A	1.3478	8.97643e-14
262	TEX261	1.26372	9.1861e-14
263	CLP1	1.1124	9.18938e-14
264	FCGRT	2.32557	9.71246e-14
265	FLVCR2	2.58502	9.98904e-14
266	SKA3	4.29814	1.00627e-13
267	CYP20A1	1.18607	1.11648e-13
268	MTHFD2	3.11919	1.11734e-13
269	FSTL1	2.82932	1.13001e-13
270	TTC26	2.55591	1.22195e-13
271	PFN1	1.73178	1.31857e-13
272	RAB13	2.25425	1.41582e-13
273	FANCI	3.1778	1.47283e-13
274	POLQ	3.98577	1.57691e-13
275	EME1	3.42922	1.6801e-13
276	THG1L	1.445	1.91693e-13
277	POFUT1	1.76268	2.06581e-13
278	KDELR2	1.87682	2.18278e-13
279	G3BP1	1.19278	2.29001e-13
280	ABHD4	2.03225	2.67301e-13
281	LMNB1	3.50645	2.81194e-13
282	GPR65	4.10511	2.84286e-13
283	DPAGT1	1.01468	3.47695e-13
284	ZNF480	1.709	3.51242e-13
285	ATP6V0E1	2.20305	3.79173e-13
286	INTS12	1.34915	3.82468e-13
287	ATP6V1C2	1.81306	3.93248e-13
288	C19orf40	2.09305	3.93366e-13
289	MORC4	1.88426	3.98122e-13
290	CNPY4	2.12687	4.02574e-13
291	GINS4	2.64677	4.15171e-13
292	TMEM45A	3.95028	4.29731e-13
293	PRDX4	2.8371	4.85497e-13
294	ANO6	2.19181	4.87116e-13
295	TMEM218	2.25215	5.10171e-13
296	SF3B14	1.39527	5.16988e-13
297	NKIRAS2	1.56477	5.35274e-13
298	MS4A6A	4.31717	5.79343e-13
299	SLC43A3	2.75544	6.0609e-13
300	CHEK1	2.34946	6.37583e-13
301	HAS2	3.93915	6.77535e-13
302	LSM5	1.99684	7.23636e-13
303	MKS1	1.33515	7.30251e-13
304	BAZ1A	2.09897	7.63091e-13
305	THADA	0.983091	7.93934e-13
306	PLEKHA9	1.69116	7.95878e-13
307	FAM46A	3.06188	8.3309e-13
308	KIF15	4.14379	8.39477e-13
309	LRRC59	1.08003	8.53499e-13
310	PPIC	2.90513	8.91037e-13
311	STT3A	1.30267	9.26177e-13
312	GINS2	3.43657	9.4619e-13
313	RNFT1	1.89612	9.55139e-13
314	FANCC	2.45731	9.56948e-13
315	TMX1	1.78801	9.62289e-13
316	ERGIC3	1.71552	9.6272e-13
317	DEPDC1	3.88792	1.07858e-12
318	C1orf226	2.98612	1.1114e-12
319	STK17B	2.44541	1.1533e-12
320	CENPH	2.95736	1.1574e-12
321	RELL1	1.52348	1.17666e-12
322	VPS25	1.4277	1.17676e-12
323	VASP	1.83068	1.2374e-12
324	HMGB2	2.34539	1.27744e-12
325	CASP4	3.34581	1.27994e-12
326	NID1	3.3576	1.29699e-12
327	CPXM1	4.17296	1.29924e-12
328	WDR77	1.03618	1.31928e-12
329	FBXO5	2.52102	1.38033e-12
330	ARL6IP6	1.63888	1.42594e-12
331	SHMT2	2.0056	1.4993e-12
332	TP53INP1	1.96009	1.52446e-12
333	PRKD1	1.82941	1.52606e-12
334	RUVBL1	1.51585	1.55225e-12
335	LIMA1	2.77291	1.58898e-12
336	C13orf34	2.18281	1.62882e-12
337	PRRX1	2.83775	1.64348e-12
338	NES	3.41893	1.71179e-12
339	C17orf95	1.36445	1.76232e-12
340	DCPS	1.38574	1.77887e-12
341	ARAF	1.29923	1.79779e-12
342	ID3	3.3137	1.79816e-12
343	C12orf48	2.79439	1.83799e-12
344	PRRC1	1.24172	1.84734e-12
345	GPX8	4.65587	1.89129e-12
346	STXBP4	1.8498	1.89863e-12
347	TSEN34	1.43412	2.24167e-12
348	CALD1	2.2735	2.3056e-12
349	CDCA4	2.61899	2.36737e-12
350	HOXA10	7.72627	2.37067e-12
351	PLSCR3	1.47708	2.49583e-12
352	TK1	3.22349	2.55068e-12
353	APOBEC3C	3.25813	2.5675e-12
354	HOXA1	5.40181	2.59445e-12
355	TMEM60	1.66874	2.76264e-12
356	PPP1R14B	2.10738	2.7902e-12
357	RAD54B	2.31948	3.00712e-12
358	DHX40	1.47491	3.07807e-12
359	MED20	1.77288	3.0852e-12
360	FADD	1.28265	3.09079e-12
361	TFPI	4.23011	3.1527e-12
362	UHRF1	3.97327	3.39131e-12
363	DZIP1L	2.27611	3.49632e-12
364	ANXA2P2	3.96429	3.58422e-12
365	ANG	3.11596	3.63741e-12
366	TRIM21	2.39405	3.71525e-12
367	TACC3	3.33401	3.77239e-12
368	GUSB	2.25633	3.86055e-12
369	DOK1	1.63482	4.0898e-12
370	SMAD5	1.35139	4.33686e-12
371	PTPN12	1.66658	4.33772e-12
372	TNFRSF12A	4.02936	4.45193e-12
373	TTC31	1.36833	4.46236e-12
374	TXNDC12	1.44713	4.48056e-12
375	PLK1	3.66344	4.4976e-12
376	PGLS	1.56533	4.49865e-12
377	CDK2AP1	1.78768	4.76989e-12
378	EDEM2	1.83632	4.78513e-12
379	SAAL1	1.49453	4.81471e-12
380	COL4A2	3.74664	4.86754e-12
381	CENPL	1.9742	4.9005e-12
382	NUDT5	1.50633	4.94928e-12
383	FAM114A2	1.32851	5.04626e-12
384	PRR11	3.03428	5.206e-12
385	SGOL2	2.42493	5.28704e-12
386	C2orf28	2.14932	5.28861e-12
387	TGFBI	4.62116	5.41311e-12
388	DBF4	2.45468	5.47852e-12
389	MRPL42	1.65223	5.59331e-12
390	MKI67IP	1.17274	5.62337e-12
391	NUDT1	2.05936	6.46722e-12
392	GINS3	2.05354	6.74891e-12
393	ST14	4.19002	6.80747e-12
394	DERA	1.91899	6.94654e-12
395	SIGLEC7	4.14312	6.98765e-12
396	SSR2	1.9319	7.01755e-12
397	NEIL3	4.26451	7.27507e-12
398	PSMB8	2.7943	7.28293e-12
399	CSTA	4.80848	7.53074e-12
400	SDCCAG3	1.55076	7.68661e-12
401	PPP4R1	1.16531	7.86396e-12
402	EEF1A1	1.96591	8.02696e-12
403	MMP14	3.64824	8.11857e-12
404	HAUS1	2.32064	8.19412e-12
405	MCM5	2.12592	8.36608e-12
406	ERGIC1	1.29303	8.68618e-12
407	PHEX	3.84044	8.70591e-12
408	RPL23	1.72924	8.83288e-12
409	B2M	2.64525	8.8654e-12
410	SLC10A7	1.36634	8.92208e-12
411	LYAR	1.38914	8.93921e-12
412	CRISPLD1	3.39702	9.20329e-12
413	LIMD1	2.2255	9.24859e-12
414	GMNN	2.2862	9.52329e-12
415	MPZL1	1.65144	9.64853e-12
416	KIAA0040	3.35695	1.0134e-11
417	TRAM1	1.82652	1.03359e-11
418	ZDHHC4	1.47903	1.03394e-11
419	NOL11	1.06747	1.0367e-11
420	IFI30	3.7621	1.05449e-11
421	PLP2	3.88087	1.05542e-11
422	NT5DC2	2.60716	1.12282e-11
423	BZW1	1.29111	1.15416e-11
424	INTS9	1.13934	1.16058e-11
425	SRPX2	5.25701	1.16617e-11
426	NEK2	3.92518	1.23781e-11
427	DARS2	1.20573	1.39703e-11
428	DHRSX	2.23545	1.42092e-11
429	MSR1	3.80042	1.50002e-11
430	NONO	1.14101	1.5486e-11
431	LAMC1	2.82316	1.63591e-11
432	TYMS	3.1734	1.67421e-11
433	POLR2J	1.69744	1.78321e-11
434	GALNT1	1.32949	1.80715e-11
435	MMP2	3.64714	1.82423e-11
436	TIMELESS	2.46304	1.83017e-11
437	SC65	1.86571	1.84467e-11
438	LYPLA1	2.22891	1.93655e-11
439	SMARCE1	1.22444	1.95722e-11
440	GAS2L3	3.7842	1.96729e-11
441	CDCA7L	3.06915	1.96837e-11
442	RPIA	1.23644	2.00479e-11
443	TMEM150A	1.58479	2.05359e-11
444	ANTXR2	2.73598	2.10559e-11
445	RNASEH2A	2.40711	2.14626e-11
446	BMP1	2.35178	2.20895e-11
447	JAM2	1.90645	2.22761e-11
448	RHOA	1.0945	2.27096e-11
449	FRRS1	4.67914	2.27854e-11
450	MFAP3	0.976852	2.29869e-11
451	BTN2A3	2.90905	2.33836e-11
452	E2F5	2.21922	2.43559e-11
453	HAS2AS	3.01303	2.62427e-11
454	VAT1	1.63489	2.63804e-11
455	MANF	1.80785	2.67481e-11
456	HELLS	3.80722	2.67597e-11
457	HMGN4	1.41576	2.69973e-11
458	TPRKB	1.50272	2.74032e-11
459	LPCAT3	1.6118	2.84981e-11
460	TMCO1	1.33466	2.97452e-11
461	SLC31A1	1.27215	3.00959e-11
462	ZCCHC4	1.20187	3.04885e-11
463	PALLD	2.06443	3.05002e-11
464	DDOST	1.30089	3.10538e-11
465	SEC61B	1.50879	3.12685e-11
466	CBFB	1.37293	3.21077e-11
467	CHCHD3	1.2351	3.34107e-11
468	RFXANK	1.43352	3.36934e-11
469	C4orf47	4.08013	3.50601e-11
470	C17orf53	2.35032	3.72586e-11
471	CD58	2.9141	4.01328e-11
472	KDELC2	2.40697	4.27153e-11
473	CENPI	3.82506	4.33265e-11
474	CYP19A1	4.73756	4.36527e-11
475	PDIA6	1.64668	4.53773e-11
476	NSMAF	1.1495	4.57144e-11
477	PGGT1B	1.20348	4.5827e-11
478	CLEC2D	1.49807	4.71908e-11
479	CTNNAL1	2.00053	4.77849e-11
480	ALG6	1.94948	4.7963e-11
481	NUP35	1.52902	4.82216e-11
482	AIDA	1.05741	4.94871e-11
483	RPS2	1.5661	4.9955e-11
484	ABHD5	1.3199	5.0323e-11
485	GLB1	1.53563	5.0361e-11
486	SFRS9	1.01477	5.09848e-11
487	ECSCR	3.09918	5.24351e-11
488	SLC30A7	1.31254	5.26675e-11
489	NMI	2.54008	5.37018e-11
490	TGIF2	2.26	5.52424e-11
491	STEAP3	3.80951	5.58969e-11
492	DDX59	1.12835	5.72859e-11
493	RFC2	1.72291	5.92852e-11
494	ELMOD2	1.4698	6.00958e-11
495	TTC23	1.4062	6.12803e-11
496	FNDC3B	2.34332	6.27939e-11
497	LOC151534	3.0017	6.66358e-11
498	CPNE3	1.45242	6.9821e-11
499	RECQL	1.46541	7.09647e-11
500	PLEK2	4.09026	7.11052e-11
501	CXCR4	2.91525	7.2543e-11
502	KIF11	3.00219	7.59149e-11
503	MSN	2.28437	7.63814e-11
504	SAP30	1.49221	7.84857e-11
505	RYK	1.36982	7.94646e-11
506	MAPKAPK2	1.34057	8.03617e-11
507	NUP54	1.13164	8.90232e-11
508	BRCA2	2.97849	8.91461e-11
509	FBXO8	1.44689	9.34076e-11
510	MMP9	7.10459	9.43291e-11
511	SF3B4	0.976569	9.89569e-11
512	CSRP2	3.15476	9.90425e-11
513	STON1	3.34876	1.04652e-10
514	HMGN1	1.39059	1.08119e-10
515	DRAM2	1.64359	1.08857e-10
516	FLJ40852	2.65891	1.08882e-10
517	BARD1	2.55694	1.10529e-10
518	TM9SF1	1.50755	1.13097e-10
519	IQGAP3	3.54291	1.1345e-10
520	BST1	2.97489	1.16121e-10
521	C1orf131	1.21052	1.20486e-10
522	UBXN2A	1.23077	1.23485e-10
523	RGL2	1.21643	1.25724e-10
524	QARS	0.948554	1.3435e-10
525	ZNF581	1.55967	1.35511e-10
526	PPIB	1.81652	1.38376e-10
527	ZNF558	1.56692	1.42401e-10
528	OSTC	2.12486	1.53862e-10
529	DCLRE1B	1.24032	1.54065e-10
530	MFAP2	5.21733	1.5409e-10
531	PRKD2	1.63803	1.54711e-10
532	GINS1	2.61015	1.5571e-10
533	TAGLN2	3.02166	1.56701e-10
534	B4GALT4	1.3342	1.57909e-10
535	RNF135	2.17647	1.5928e-10
536	HM13	1.26809	1.60809e-10
537	LOC100271831	5.0449	1.61523e-10
538	CASP8	2.28999	1.65316e-10
539	NCK1	1.34571	1.66269e-10
540	TMEM179B	1.76658	1.66927e-10
541	CRLS1	1.36738	1.69202e-10
542	MCM2	2.66118	1.70189e-10
543	LOC401397	1.73067	1.70863e-10
544	C14orf109	1.40751	1.72036e-10
545	TNFSF13B	3.56266	1.75832e-10
546	POPDC2	2.04329	1.76001e-10
547	NAT1	2.83125	1.78074e-10
548	DCAF12	1.30863	1.83101e-10
549	LDLRAD3	2.00983	1.83336e-10
550	DEPDC1B	3.58926	1.83443e-10
551	C5orf43	0.889289	1.8689e-10
552	ANTXR1	1.94554	1.91587e-10
553	S1PR3	2.83189	1.92396e-10
554	BTG3	1.82783	1.97817e-10
555	BRI3	1.68845	2.1722e-10
556	PLEKHA4	3.18773	2.17866e-10
557	MR1	2.50415	2.20423e-10
558	IGFBP7	3.04052	2.26985e-10
559	TMEM138	1.35257	2.27291e-10
560	CLK2P	1.63355	2.31314e-10
561	ANXA1	4.01673	2.3197e-10
562	CASP2	1.80676	2.34711e-10
563	GIMAP2	2.64377	2.40799e-10
564	PARP9	2.33594	2.45779e-10
565	DRAM1	2.61009	2.46152e-10
566	FN1	3.38939	2.60638e-10
567	CALU	2.20771	2.62488e-10
568	C2orf44	1.15923	2.69597e-10
569	NXT2	2.12498	2.69637e-10
570	FIBIN	2.11271	2.72387e-10
571	HOXA5	5.83696	2.8362e-10
572	S100A11	3.17605	2.89428e-10
573	EIF2B1	0.755518	2.95072e-10
574	CCDC71	1.1975	3.00947e-10
575	GTF3C2	0.85921	3.11905e-10
576	MCCC2	1.15265	3.12084e-10
577	MAP7D3	2.18548	3.23944e-10
578	COPB1	1.07198	3.26086e-10
579	NAGA	1.68481	3.33737e-10
580	PECI	1.50478	3.39182e-10
581	CD44	3.53313	3.41367e-10
582	TANC1	1.61319	3.48504e-10
583	ZCCHC8	1.01509	3.51936e-10
584	DPEP1	6.71872	3.53963e-10
585	NAGLU	1.3947	3.54224e-10
586	CALR	1.45757	3.54466e-10
587	RCN1	1.7519	3.66348e-10
588	SUMO1P3	1.18367	3.75309e-10
589	PI4K2B	1.54576	3.78029e-10
590	PDCD1LG2	4.03061	3.78179e-10
591	TRIM4	1.76628	3.81446e-10
592	AFAP1L1	2.99441	3.8203e-10
593	CBX3	1.56092	3.82799e-10
594	FAM57A	1.75592	4.00159e-10
595	OVCA2	1.83973	4.00825e-10
596	LAPTM4A	1.62656	4.04955e-10
597	KIF18B	4.09405	4.22348e-10
598	MOBKL1B	1.68179	4.26536e-10
599	RNF122	2.70653	4.36129e-10
600	ADPRH	1.99778	4.43967e-10
601	GBE1	2.03541	4.45585e-10
602	SSBP1	1.45109	4.48035e-10
603	C9orf46	1.82932	4.54596e-10
604	CD93	3.09659	4.60474e-10
605	CD99	2.92278	4.65437e-10
606	INTS8	1.08096	4.80406e-10
607	ANXA2	3.4499	4.80484e-10
608	METAP2	1.01201	4.81644e-10
609	CCNB1	2.84473	4.81973e-10
610	SNX7	1.80332	4.97005e-10
611	TCF12	2.12019	5.11912e-10
612	ORMDL2	1.76236	5.12747e-10
613	POLD3	1.1336	5.1702e-10
614	TEAD2	3.20582	5.3279e-10
615	CLIC4	1.96786	5.33898e-10
616	S100A3	4.11922	5.49386e-10
617	RIPK1	1.30788	5.49838e-10
618	ITGA4	3.43902	5.58196e-10
619	MS4A4A	4.00361	5.71699e-10
620	EFNA4	2.52263	5.82625e-10
621	GLT8D1	1.02224	6.1181e-10
622	GORAB	1.44124	6.13147e-10
623	ZNRD1	1.85611	6.30564e-10
624	SLC7A7	2.69244	6.41237e-10
625	RUNX3	2.64212	6.51762e-10
626	C6orf145	1.87213	6.55468e-10
627	DARS	1.09585	6.65692e-10
628	HNRNPF	1.15846	6.68394e-10
629	POLR1B	1.02506	6.71782e-10
630	MAN2B1	1.96768	6.91006e-10
631	SNRNP40	1.4066	7.02905e-10
632	EXOC3L2	4.65953	7.35319e-10
633	HBP1	1.38592	7.78661e-10
634	TMEM43	1.1625	7.84475e-10
635	ETV6	1.47863	8.00788e-10
636	RPS15A	2.15252	8.02829e-10
637	SOCS1	3.52645	8.08601e-10
638	ABCC3	5.46716	8.12274e-10
639	ITGB3BP	1.85162	8.14557e-10
640	CHCHD8	1.55394	8.15342e-10
641	LMAN2	1.36394	8.17662e-10
642	PVT1	2.49548	8.27574e-10
643	DECR1	1.27323	8.3248e-10
644	HMGN2	1.91083	8.45757e-10
645	DDX52	1.06006	8.66212e-10
646	IFRD2	1.37682	8.66427e-10
647	PDPN	3.96921	8.81636e-10
648	ARHGAP42	1.97458	8.82567e-10
649	RAB31	1.66163	8.86247e-10
650	ARFIP1	1.12456	8.87205e-10
651	TBX15	3.55147	8.93856e-10
652	RNF114	1.04367	9.08918e-10
653	RBL1	2.11732	9.13965e-10
654	LEPRE1	1.97992	9.16254e-10
655	PIGF	1.46073	9.23275e-10
656	MAPK7	1.34192	9.69497e-10
657	POT1	1.46921	9.9435e-10
658	CDKN2C	3.33286	9.95014e-10
659	METTL7B	5.03403	1.00933e-09
660	FBXO4	1.9321	1.00934e-09
661	ZNF599	1.22332	1.02285e-09
662	MCM3	1.70855	1.02527e-09
663	TIPIN	1.40824	1.02672e-09
664	C17orf87	3.12303	1.03844e-09
665	MFNG	2.17916	1.05464e-09
666	NVL	1.05434	1.06754e-09
667	C2orf68	1.28422	1.07796e-09
668	TCTN1	1.76927	1.07944e-09
669	SPINK8	4.69866	1.0866e-09
670	TP53I13	1.73287	1.10188e-09
671	SPG21	1.08097	1.14671e-09
672	APEX2	1.10397	1.16409e-09
673	RPSAP9	1.82261	1.17231e-09
674	POLD2	1.34214	1.18223e-09
675	RAB20	2.33442	1.26858e-09
676	LOC100270710	2.57987	1.27416e-09
677	GOLPH3	0.806294	1.28188e-09
678	ODC1	2.01418	1.28412e-09
679	CDC42SE1	1.02026	1.30817e-09
680	RPSAP58	2.06513	1.33234e-09
681	FAM176B	2.47513	1.35698e-09
682	PSMC3IP	2.09009	1.39961e-09
683	BFAR	0.901292	1.40595e-09
684	C8orf41	1.20517	1.42237e-09
685	POTEE	2.0335	1.42267e-09
686	KATNA1	1.20525	1.44126e-09
687	LSM2	1.99158	1.46112e-09
688	TES	2.32105	1.46127e-09
689	GAPT	3.53538	1.47011e-09
690	C11orf67	1.37241	1.4854e-09
691	TXNRD3IT1	1.53822	1.49348e-09
692	STX10	1.2246	1.50768e-09
693	HN1L	1.53959	1.55518e-09
694	IRAK4	1.59231	1.59814e-09
695	PPP1R3B	2.46399	1.67e-09
696	SNHG3-RCC1	1.69271	1.68813e-09
697	ITGA1	2.83072	1.70394e-09
698	ATG4A	1.37202	1.71356e-09
699	PABPC1	1.35256	1.75071e-09
700	FAM116A	0.938631	1.77633e-09
701	TCF3	1.92402	1.78613e-09
702	GLIPR2	2.15719	1.79255e-09
703	ATAD2	2.07071	1.81314e-09
704	GANAB	1.03419	1.81955e-09
705	KDELR1	1.32386	1.8259e-09
706	HNF4G	3.26681	1.85412e-09
707	ZNF3	1.26271	1.85424e-09
708	GNASAS	3.28216	1.85745e-09
709	ITGA5	2.85654	1.88235e-09
710	P4HB	1.5161	1.89699e-09
711	ZMYM1	1.29791	1.90154e-09
712	PARP4	1.51521	1.94184e-09
713	LBR	1.51443	1.96424e-09
714	TWF1	1.40888	1.99551e-09
715	TNPO1	1.04183	2.00064e-09
716	CPT2	0.916488	2.01315e-09
717	EMP3	3.4573	2.02836e-09
718	TMEM39A	1.67855	2.10407e-09
719	FAM96A	1.66389	2.10732e-09
720	LAMP3	3.20254	2.11499e-09
721	CC2D2A	1.49725	2.11702e-09
722	ZCCHC9	1.47714	2.15203e-09
723	KRTCAP2	1.43916	2.17032e-09
724	SERINC2	3.77436	2.18469e-09
725	SLC16A4	3.09991	2.20794e-09
726	DPP3	0.996211	2.25228e-09
727	DKC1	1.03518	2.28721e-09
728	TIMP4	4.03178	2.34386e-09
729	C20orf4	0.925699	2.38201e-09
730	SDCBP	1.21618	2.3997e-09
731	LOXL2	3.68154	2.41349e-09
732	ADH5	1.19312	2.42379e-09
733	RPL23A	1.45324	2.43051e-09
734	MFSD1	1.50841	2.43294e-09
735	ZBTB42	2.55968	2.4572e-09
736	CDKAL1	1.26639	2.53577e-09
737	EIF5AL1	1.20964	2.58136e-09
738	HOXA3	6.27813	2.58685e-09
739	PRPF38A	1.07374	2.62272e-09
740	PRKAB1	0.92137	2.64353e-09
741	SH3GLB1	1.16002	2.71962e-09
742	CSDA	2.26307	2.74657e-09
743	PPM1G	0.904682	2.74812e-09
744	GNA13	1.11898	2.75257e-09
745	DPH5	1.40591	2.7536e-09
746	CLN3	0.996317	2.78446e-09
747	GNAI2	1.11197	2.80323e-09
748	C12orf11	1.06507	2.82316e-09
749	ZC3HAV1	1.64312	2.91157e-09
750	ARF4	1.42933	2.96545e-09
751	SLC38A6	1.76025	2.98563e-09
752	FAM136A	1.00959	3.01481e-09
753	G6PC3	1.24481	3.01486e-09
754	COL3A1	5.44078	3.05593e-09
755	BCDIN3D	1.24977	3.0749e-09
756	PDIA5	2.53371	3.11248e-09
757	PSMB9	2.81642	3.14626e-09
758	PPP1CC	1.0894	3.16048e-09
759	MBD2	1.28266	3.20493e-09
760	C5orf39	3.1498	3.21014e-09
761	BRIP1	3.51307	3.30375e-09
762	SPPL2A	1.53794	3.41901e-09
763	PMS2L2	1.55717	3.43328e-09
764	CD151	2.33425	3.46228e-09
765	COPZ1	1.17049	3.52726e-09
766	GABPB1	1.14659	3.57315e-09
767	PDE6G	3.06687	3.58052e-09
768	TRIP13	2.39453	3.65662e-09
769	PHC2	1.22558	3.68224e-09
770	OST4	1.78112	3.73661e-09
771	LOC222699	2.97078	3.73728e-09
772	RFWD3	1.55971	3.80355e-09
773	PBX3	1.92441	3.86619e-09
774	RPL39	2.58489	3.9512e-09
775	GBP2	3.0818	3.99692e-09
776	C2orf43	1.24761	4.02337e-09
777	APBA3	1.32527	4.06021e-09
778	BTN3A1	1.75742	4.12275e-09
779	ZNF788	1.79521	4.17394e-09
780	KARS	0.848011	4.22234e-09
781	AGTRAP	1.92645	4.25242e-09
782	GPN1	1.40538	4.29779e-09
783	CENPQ	1.75853	4.29872e-09
784	PTPN7	2.89965	4.32095e-09
785	CD320	1.62999	4.3409e-09
786	ZC3HC1	1.38406	4.44215e-09
787	MCM6	1.61811	4.44732e-09
788	NRAS	1.10655	4.4534e-09
789	ARHGDIB	2.1989	4.66444e-09
790	CASP3	1.69703	4.6695e-09
791	EIF4A1	1.17843	4.71699e-09
792	RAB8A	0.959832	4.71835e-09
793	ATP10D	1.5997	4.76143e-09
794	C20orf108	1.2176	4.84431e-09
795	KRT10	1.74622	4.89675e-09
796	DENND2D	3.07234	4.9566e-09
797	MAGT1	1.69643	5.07451e-09
798	CD163	5.00945	5.18842e-09
799	YES1	1.36934	5.2424e-09
800	ORAI3	1.32515	5.32193e-09
801	AIMP1	0.920457	5.40281e-09
802	TCEA1	1.01922	5.44287e-09
803	DAXX	0.864608	5.45272e-09
804	CORO1B	1.03577	5.4963e-09
805	FCER1G	2.9365	5.57416e-09
806	ZIC1	2.76652	5.58891e-09
807	HDAC3	0.911234	5.59662e-09
808	UIMC1	0.993586	5.71145e-09
809	TMEM149	1.97361	5.74105e-09
810	MRPS14	1.14436	5.75668e-09
811	TRIP6	2.15445	5.91037e-09
812	UTP6	0.851751	6.0381e-09
813	DTX3L	2.13353	6.08961e-09
814	CENPF	3.43453	6.3969e-09
815	THOC4	1.21132	6.42848e-09
816	RACGAP1	1.91708	6.46521e-09
817	DNASE2	1.38653	6.47937e-09
818	BMF	2.41531	6.73751e-09
819	SLC25A39	1.02658	6.85531e-09
820	VNN1	3.73494	6.9301e-09
821	HOXB7	6.12747	6.99329e-09
822	PCTP	1.49782	6.99946e-09
823	IMPDH2	1.0456	7.00504e-09
824	PHACTR4	1.11004	7.09324e-09
825	SLC25A13	1.2856	7.16462e-09
826	FRMD8	1.16388	7.16566e-09
827	ARHGEF6	1.70967	7.2968e-09
828	STIL	2.11696	7.33471e-09
829	GALK1	1.75255	7.47737e-09
830	YIF1A	1.36432	7.49984e-09
831	MAPKAPK3	1.5214	7.56603e-09
832	GPBAR1	2.68183	7.83166e-09
833	S100A4	3.79597	8.0419e-09
834	RAD51L1	1.61733	8.04296e-09
835	SNX5	1.12065	8.20723e-09
836	SPC24	4.43625	8.38519e-09
837	SLC35D2	1.53945	8.44273e-09
838	KTELC1	1.14708	8.44685e-09
839	RPL30	1.46097	8.45551e-09
840	BCL7C	1.48616	8.74199e-09
841	ZNF140	1.18979	8.76415e-09
842	FBXO43	3.49003	8.9548e-09
843	STK17A	2.31545	8.95566e-09
844	CYTL1	3.47209	8.95631e-09
845	RFC4	1.73946	9.1084e-09
846	RBM43	1.46837	9.4756e-09
847	CASP1	2.79111	9.54903e-09
848	PROS1	2.95238	9.55783e-09
849	ZNF200	0.851718	9.59571e-09
850	CPVL	3.1297	9.77444e-09
851	PPAPDC1B	1.4066	9.92594e-09
852	AIMP2	1.27047	1.00013e-08
853	LAMB2	1.89039	1.00627e-08
854	NCSTN	0.963183	1.01165e-08
855	UNG	1.20957	1.02043e-08
856	SLC2A9	2.34763	1.02582e-08
857	LOC653566	0.996469	1.04645e-08
858	ZWINT	2.43294	1.04657e-08
859	NTN1	2.5641	1.04674e-08
860	ADAM17	1.1798	1.05249e-08
861	MOSPD3	1.25941	1.05826e-08
862	DPYSL3	1.90396	1.0641e-08
863	HAPLN3	2.35172	1.08343e-08
864	JAG1	2.45733	1.09246e-08
865	RAVER1	1.35745	1.09497e-08
866	TTF2	1.31993	1.12026e-08
867	RPS19	1.97754	1.13482e-08
868	EEF1G	1.23144	1.13634e-08
869	RPN1	1.06205	1.14676e-08
870	CSDAP1	2.24424	1.14781e-08
871	GRN	1.66549	1.19075e-08
872	CCDC15	2.13742	1.20989e-08
873	PYCR1	1.84103	1.234e-08
874	UBE2E1	1.29762	1.28092e-08
875	TMEM71	3.70922	1.31394e-08
876	PIF1	3.17506	1.31766e-08
877	CBX8	1.45452	1.33853e-08
878	SPOCD1	5.12199	1.36177e-08
879	C19orf48	1.89957	1.38267e-08
880	F2RL3	3.77869	1.38351e-08
881	SF3A3	0.78171	1.39444e-08
882	CENPE	2.93876	1.39542e-08
883	CDC23	0.793787	1.40405e-08
884	AUP1	1.07785	1.44013e-08
885	SSR4	1.7202	1.44385e-08
886	MEX3A	3.60145	1.4559e-08
887	TMEM154	2.70514	1.45937e-08
888	MAML2	2.0728	1.46945e-08
889	POP5	1.57037	1.49428e-08
890	XRCC4	1.22169	1.50192e-08
891	AAAS	1.01958	1.52155e-08
892	POLR2G	1.62028	1.54761e-08
893	MPV17	1.21469	1.61162e-08
894	CD248	3.11447	1.63043e-08
895	SLC4A2	1.70637	1.64166e-08
896	PNP	1.76706	1.65813e-08
897	STK3	1.36039	1.65962e-08
898	NFE2L2	1.03465	1.71402e-08
899	ARHGAP15	2.59313	1.72325e-08
900	FBXL12	1.01733	1.73911e-08
901	TBX2	2.38316	1.74404e-08
902	SCAMP2	1.01029	1.79047e-08
903	MIF4GD	1.40184	1.81411e-08
904	TMEM37	2.78929	1.84711e-08
905	ZKSCAN4	0.850004	1.85073e-08
906	FAM35A	1.09374	1.88239e-08
907	FPR3	3.74006	1.94676e-08
908	TSPAN4	1.68596	1.96898e-08
909	ITGB1	1.78539	1.97435e-08
910	SHFM1	1.37054	1.97535e-08
911	COPB2	0.895147	1.98899e-08
912	FHL3	1.55555	1.99372e-08
913	COX4NB	1.10806	1.99875e-08
914	GEMIN6	1.49958	2.01439e-08
915	ADAMTS6	2.79175	2.03475e-08
916	ZNF93	2.01218	2.09417e-08
917	KNTC1	2.15687	2.09518e-08
918	CTDSP1	1.23021	2.10633e-08
919	POLG2	1.1349	2.11359e-08
920	CTNS	1.0209	2.12057e-08
921	ILF2	1.24067	2.1266e-08
922	NOP10	1.65691	2.24861e-08
923	RCC2	1.30623	2.28115e-08
924	SLC35F5	1.37328	2.28837e-08
925	POLA1	1.46144	2.29825e-08
926	HEXB	1.73416	2.31114e-08
927	ITFG3	1.2064	2.31269e-08
928	PLSCR1	2.36763	2.3342e-08
929	MRPL36	1.44812	2.34726e-08
930	FAM105B	0.922038	2.35228e-08
931	PRCP	1.99202	2.39334e-08
932	PLAU	3.80012	2.41138e-08
933	C5orf62	3.00971	2.44864e-08
934	TFG	0.72279	2.46819e-08
935	ZNF792	1.22267	2.48749e-08
936	CKS1B	2.04896	2.49026e-08
937	STK36	1.7078	2.51013e-08
938	MEX3C	1.26769	2.5233e-08
939	GNB2	1.12289	2.59352e-08
940	BRMS1	0.917081	2.66906e-08
941	ZC3H10	0.987456	2.67192e-08
942	FLNA	2.40844	2.67418e-08
943	CDC6	2.39718	2.69285e-08
944	GSTK1	1.73609	2.69363e-08
945	ELTD1	2.15827	2.70202e-08
946	PKN2	1.00523	2.74596e-08
947	SYTL4	2.35458	2.76871e-08
948	FAM129A	2.94856	2.77325e-08
949	ARL2BP	1.16055	2.79405e-08
950	ZAK	1.37826	2.80175e-08
951	MXD3	2.06106	2.82993e-08
952	KCNMB1	2.81773	2.83323e-08
953	SNRPA	0.976445	2.848e-08
954	PLOD3	1.83581	2.86216e-08
955	DONSON	1.44031	2.90976e-08
956	EPS8	1.15312	2.92473e-08
957	TMEM8A	1.34219	2.92576e-08
958	ERCC8	1.09137	2.92766e-08
959	RAB32	2.62838	2.94906e-08
960	RFC5	1.36933	2.9541e-08
961	FOXD1	3.24719	2.96595e-08
962	SHMT1	1.38014	2.97408e-08
963	ZNF561	1.25871	3.01425e-08
964	ELK3	1.92563	3.01861e-08
965	BTN3A2	2.45878	3.02203e-08
966	NPC2	2.42101	3.05238e-08
967	MOBKL2A	1.11911	3.06985e-08
968	CD63	2.053	3.09725e-08
969	RAD18	1.59646	3.12197e-08
970	S100A2	3.35155	3.1748e-08
971	TRIM34	2.49797	3.18257e-08
972	BAX	1.36105	3.18503e-08
973	CHRAC1	1.04994	3.20962e-08
974	ZFP36L2	1.72233	3.21641e-08
975	C2orf29	0.679353	3.26403e-08
976	MCL1	1.22278	3.26511e-08
977	WBP5	1.44759	3.26678e-08
978	DERL2	1.33223	3.27034e-08
979	TTC38	1.55656	3.27793e-08
980	NME7	1.12993	3.34424e-08
981	EHD4	1.66743	3.35996e-08
982	IRX5	4.73789	3.37593e-08
983	SNRPF	1.20309	3.38722e-08
984	FANCE	1.51982	3.50213e-08
985	ABCB4	2.49521	3.57904e-08
986	ZNF559	1.26049	3.57911e-08
987	RALY	0.9338	3.58961e-08
988	MAD2L1	2.42381	3.59076e-08
989	FARS2	0.94303	3.63326e-08
990	CCDC111	1.36444	3.72269e-08
991	BCL10	0.971276	3.75699e-08
992	TAF12	1.22931	3.76461e-08
993	SLC1A5	2.24634	3.78956e-08
994	SERPINB6	1.43531	3.81933e-08
995	TBL2	1.18634	3.85952e-08
996	PLIN3	1.70438	3.90183e-08
997	C3orf38	1.20437	3.94747e-08
998	NMB	3.39954	3.9721e-08
999	MOV10	1.56603	3.98186e-08
1000	MYC	2.29595	4.04198e-08
1001	RPF1	1.09695	4.12833e-08
1002	RSU1	1.18255	4.17958e-08
1003	APOL4	4.55576	4.22374e-08
1004	ELN	2.78992	4.23065e-08
1005	RBM47	2.77903	4.29007e-08
1006	TNFRSF1A	1.89101	4.32398e-08
1007	HAUS4	1.48628	4.32453e-08
1008	ST7	1.01667	4.3597e-08
1009	RPL41	1.77708	4.37269e-08
1010	FPGS	1.05262	4.44101e-08
1011	MIS12	1.30006	4.45895e-08
1012	WDR34	1.76546	4.46063e-08
1013	CXCL16	1.98566	4.4627e-08
1014	EN1	6.36602	4.4698e-08
1015	SP3	0.837858	4.5323e-08
1016	MDFI	3.71439	4.55168e-08
1017	CDKN3	2.60086	4.57196e-08
1018	IFI16	2.28437	4.63296e-08
1019	MFRP	2.31967	4.65633e-08
1020	VSIG10	1.3373	4.66385e-08
1021	BRCA1	1.79048	4.68078e-08
1022	C19orf56	1.14304	4.88016e-08
1023	PSMA2	1.48073	4.89771e-08
1024	TMEM99	1.69344	4.97023e-08
1025	TMED9	1.07857	5.07773e-08
1026	HOXA7	7.17062	5.13986e-08
1027	SLC30A5	0.936295	5.23894e-08
1028	ITGB3	3.41347	5.2847e-08
1029	LRRC42	1.16692	5.31716e-08
1030	TMEM194B	1.38945	5.36078e-08
1031	RAI14	1.85843	5.42372e-08
1032	ZNF700	1.34266	5.48611e-08
1033	UBD	4.8498	5.6537e-08
1034	CPSF4	1.26596	5.71677e-08
1035	HLA-DMB	2.87551	5.72793e-08
1036	C17orf62	0.919503	5.82149e-08
1037	TGFBR1	1.4925	5.89231e-08
1038	TMEM133	1.51125	5.91212e-08
1039	C19orf35	2.54313	6.05557e-08
1040	CXCR2	3.46027	6.12466e-08
1041	HOXD9	5.86951	6.33061e-08
1042	CNOT10	0.7946	6.43605e-08
1043	PLOD1	1.77015	6.51848e-08
1044	SSR1	0.856268	6.56568e-08
1045	ZYX	1.9915	6.63463e-08
1046	HOXB3	6.44635	6.6529e-08
1047	CDC25A	2.68913	6.68669e-08
1048	SLC40A1	2.5833	6.71392e-08
1049	FAM72A	2.53032	6.72747e-08
1050	KCNE3	2.35365	6.77021e-08
1051	ELP4	1.19024	6.80702e-08
1052	RAP1B	1.70449	6.84701e-08
1053	HMBS	1.38954	6.85846e-08
1054	CXorf26	0.964446	6.96823e-08
1055	FCGBP	3.81516	7.00987e-08
1056	MGAT2	1.01935	7.02645e-08
1057	SNAP23	1.29118	7.0685e-08
1058	FAIM3	2.69235	7.1282e-08
1059	TUBB6	2.57954	7.14112e-08
1060	IFT52	1.33645	7.18247e-08
1061	NCBP2	0.849649	7.26202e-08
1062	C21orf62	4.11728	7.32859e-08
1063	HLA-DMA	2.54214	7.4826e-08
1064	C1orf85	1.65796	7.58954e-08
1065	C4orf46	1.45484	7.62544e-08
1066	CNO	0.977644	7.67335e-08
1067	LRRC37B2	0.868455	7.73523e-08
1068	FAM72D	2.23966	7.84237e-08
1069	TRAIP	2	8.05179e-08
1070	NGLY1	0.817679	8.08713e-08
1071	PCBP2	0.77593	8.21467e-08
1072	CAPG	2.37538	8.21541e-08
1073	HDGF	0.937355	8.2503e-08
1074	HNRNPAB	1.1692	8.25586e-08
1075	ELF2	0.724589	8.51247e-08
1076	FAM86C	1.05872	8.5517e-08
1077	GSTCD	1.24511	8.59161e-08
1078	GLT25D1	1.5817	8.67472e-08
1079	C19orf54	1.19184	8.72177e-08
1080	ABHD3	1.31367	8.74809e-08
1081	ANKHD1-EIF4EBP3	1.79335	8.88162e-08
1082	TNFRSF10C	2.89801	9.04122e-08
1083	DNPEP	0.943043	9.06331e-08
1084	PROCR	2.39586	9.09768e-08
1085	THUMPD3	0.763923	9.19339e-08
1086	CLN5	1.49987	9.2048e-08
1087	KPNA2	1.27837	9.2379e-08
1088	GPR172A	1.19691	9.25445e-08
1089	PITX1	5.95428	9.27269e-08
1090	TBCCD1	1.13238	9.3337e-08
1091	TROVE2	0.788562	9.3526e-08
1092	TREM1	5.19682	9.39534e-08
1093	SFRP4	3.4973	9.41446e-08
1094	C20orf24	1.30001	9.44545e-08
1095	EMP1	2.9169	9.47332e-08
1096	GTF2H2C	1.46754	9.5068e-08
1097	WBSCR16	1.13177	9.65754e-08
1098	MOSPD1	1.24184	9.7896e-08
1099	DBI	2.18672	9.80002e-08
1100	VEZF1	1.03623	9.93243e-08
1101	VKORC1	1.46119	1.00154e-07
1102	RNASE4	2.30149	1.01482e-07
1103	ECT2	1.80783	1.03508e-07
1104	TMEM69	0.811883	1.04276e-07
1105	C8orf58	1.08452	1.05227e-07
1106	SERPINA3	3.83919	1.064e-07
1107	GGH	1.85191	1.07593e-07
1108	CCDC109B	2.4404	1.08636e-07
1109	RPL29	1.58929	1.09188e-07
1110	UBE2L6	1.47844	1.11961e-07
1111	SKA2	1.21858	1.12593e-07
1112	ASIP	3.24095	1.12823e-07
1113	BNIP2	1.04273	1.135e-07
1114	UNC119B	1.18693	1.15906e-07
1115	PMM2	1.15312	1.16119e-07
1116	RAD54L	2.67983	1.16914e-07
1117	DDX60L	1.96827	1.17993e-07
1118	DAD1	1.32719	1.18366e-07
1119	TPRA1	0.77768	1.20684e-07
1120	MEST	3.30647	1.21116e-07
1121	C9orf100	2.42137	1.21319e-07
1122	C17orf42	1.43413	1.21843e-07
1123	GBP1	3.10284	1.22905e-07
1124	CDC73	0.863978	1.22914e-07
1125	HEBP2	1.73244	1.23651e-07
1126	CLNS1A	0.989637	1.23742e-07
1127	CDCA3	2.10613	1.24531e-07
1128	ZNF823	1.16226	1.2595e-07
1129	C9orf21	1.44593	1.26088e-07
1130	GRAP	1.91963	1.26328e-07
1131	HIST1H4J	3.50068	1.27391e-07
1132	GNB4	1.45627	1.30336e-07
1133	NR2C2AP	1.43765	1.30445e-07
1134	STAT3	1.02748	1.30553e-07
1135	MCM7	1.95477	1.31046e-07
1136	TMEM106C	2.08094	1.31151e-07
1137	TMED5	1.2015	1.31899e-07
1138	DIAPH3	2.2666	1.32473e-07
1139	COTL1	1.50745	1.32997e-07
1140	MIOS	0.895598	1.33622e-07
1141	TMEM147	1.26578	1.33754e-07
1142	ZNF22	1.16418	1.33874e-07
1143	ELF1	1.25078	1.3411e-07
1144	TRPT1	1.28291	1.34167e-07
1145	ABHD14B	1.45205	1.35213e-07
1146	PIGW	1.13025	1.36366e-07
1147	TAP1	2.27388	1.37027e-07
1148	CBX2	3.15032	1.37374e-07
1149	FAM72B	1.96366	1.39044e-07
1150	C17orf65	1.42366	1.39938e-07
1151	DNTTIP1	1.02404	1.40257e-07
1152	MNS1	2.29057	1.40644e-07
1153	CD1D	2.97192	1.41385e-07
1154	HSPBAP1	1.08935	1.4446e-07
1155	ROMO1	1.98377	1.44839e-07
1156	SLFN12	2.55176	1.4696e-07
1157	FCGR2A	2.73418	1.47406e-07
1158	FAM100B	1.53641	1.48026e-07
1159	IRAK1	1.13476	1.48448e-07
1160	GAR1	0.92149	1.50452e-07
1161	LPL	3.27719	1.5571e-07
1162	C21orf7	3.25249	1.55945e-07
1163	MYL6	1.79767	1.5658e-07
1164	CXCR7	2.00988	1.56775e-07
1165	FLT3LG	1.92055	1.60602e-07
1166	SEPN1	1.65317	1.61965e-07
1167	TCF7	2.05798	1.6264e-07
1168	OSR2	4.26895	1.63026e-07
1169	PDLIM7	1.97543	1.63049e-07
1170	MALT1	1.33644	1.67695e-07
1171	ZFAND6	1.44746	1.68156e-07
1172	ETAA1	0.967762	1.68731e-07
1173	RBMS1	1.75405	1.70621e-07
1174	PHF19	1.82238	1.70727e-07
1175	PIGC	1.23001	1.71422e-07
1176	C1orf86	1.26455	1.74081e-07
1177	CETP	3.30546	1.74905e-07
1178	EFNB1	1.54807	1.75641e-07
1179	LY6G5C	1.69791	1.7625e-07
1180	CROT	1.85343	1.77982e-07
1181	HLA-B	2.41769	1.80678e-07
1182	FZD2	2.02973	1.83276e-07
1183	LIX1L	0.959097	1.88881e-07
1184	VAMP8	2.7896	1.89862e-07
1185	CCDC50	1.04462	1.90963e-07
1186	HPD	5.35392	1.92657e-07
1187	CD48	3.5785	1.92707e-07
1188	C6orf129	2.00346	1.94602e-07
1189	CRTAP	1.10034	1.95253e-07
1190	EXOSC8	1.54536	1.98918e-07
1191	SLC37A2	2.54634	2.01845e-07
1192	STAP2	1.8966	2.02465e-07
1193	MRPL11	1.40566	2.02567e-07
1194	APOC1	2.97199	2.02668e-07
1195	PCGF1	1.00319	2.02914e-07
1196	CTSC	2.53534	2.0354e-07
1197	LASS5	1.05025	2.03859e-07
1198	TMBIM6	1.01332	2.04906e-07
1199	DHFR	1.7042	2.05378e-07
1200	RPS14	1.75464	2.06329e-07
1201	ING3	1.27006	2.06445e-07
1202	PAFAH2	1.05731	2.07766e-07
1203	PAICS	1.43391	2.09928e-07
1204	ETV1	2.3123	2.1146e-07
1205	NKX2-5	6.01183	2.12528e-07
1206	MAD2L2	1.72917	2.16366e-07
1207	HLA-DRA	2.96262	2.1891e-07
1208	PDIA3P	1.2707	2.21863e-07
1209	TRIAP1	1.39153	2.22509e-07
1210	MSX1	1.7664	2.22606e-07
1211	TRAFD1	0.797277	2.23057e-07
1212	SIKE1	0.836837	2.23462e-07
1213	KLHDC8A	3.34168	2.23481e-07
1214	ARHGAP18	2.01418	2.2643e-07
1215	TANK	1.14885	2.28016e-07
1216	SQRDL	2.13808	2.28828e-07
1217	VCAN	1.93487	2.30431e-07
1218	RPA1	0.877551	2.31554e-07
1219	MRC2	2.71128	2.31631e-07
1220	C14orf93	1.11161	2.31988e-07
1221	IFNGR2	1.30094	2.32011e-07
1222	HOXC6	5.11924	2.32122e-07
1223	UTP15	0.864044	2.32302e-07
1224	VSIG4	3.34634	2.33425e-07
1225	SEC13	1.04835	2.35699e-07
1226	KIF4B	2.58221	2.38072e-07
1227	CCDC76	1.16762	2.4138e-07
1228	MTFR1	1.31493	2.43625e-07
1229	BTN3A3	1.79832	2.44749e-07
1230	AP4M1	1.19456	2.44991e-07
1231	TOR1B	0.95768	2.45423e-07
1232	HLA-A	2.19095	2.47336e-07
1233	TRIM47	1.93824	2.54616e-07
1234	LIMS1	1.84234	2.55214e-07
1235	RPLP2	1.45668	2.55246e-07
1236	IGFBP4	2.3972	2.59134e-07
1237	C12orf32	1.04219	2.65221e-07
1238	AEN	1.75866	2.65415e-07
1239	TNFRSF10B	2.0716	2.67138e-07
1240	AGPAT5	1.20344	2.67162e-07
1241	TMED1	1.33241	2.71269e-07
1242	PUS3	0.96748	2.72723e-07
1243	WWTR1	2.6603	2.72822e-07
1244	NANP	1.12982	2.73131e-07
1245	C1orf162	2.46305	2.73894e-07
1246	RDH10	2.89252	2.74861e-07
1247	DNALI1	2.33644	2.75699e-07
1248	ILK	1.2563	2.77849e-07
1249	RDX	1.31767	2.8109e-07
1250	UXT	1.52204	2.81886e-07
1251	KRCC1	1.33312	2.82685e-07
1252	PRIM1	1.60383	2.89047e-07
1253	ATPBD4	1.59699	2.93842e-07
1254	LEF1	2.02195	2.97499e-07
1255	ZNF330	0.790793	2.99228e-07
1256	KYNU	2.9893	3.00532e-07
1257	LOC388955	1.18252	3.01737e-07
1258	DFNA5	1.52674	3.03712e-07
1259	MUC1	2.49746	3.03946e-07
1260	OXSM	1.36923	3.05824e-07
1261	KANK2	1.84848	3.05919e-07
1262	SIX1	3.77243	3.10971e-07
1263	C9orf171	4.97109	3.13614e-07
1264	TMEM51	1.49287	3.17875e-07
1265	TMPO	1.56893	3.21088e-07
1266	TPRG1	2.66929	3.21338e-07
1267	POFUT2	1.1377	3.27589e-07
1268	PLBD1	2.62158	3.30155e-07
1269	LAP3	1.40572	3.31016e-07
1270	TXNIP	1.77475	3.37984e-07
1271	ZNF69	1.76858	3.38922e-07
1272	PPIL3	1.4259	3.42971e-07
1273	RGS19	1.39874	3.44299e-07
1274	SNAPIN	1.42892	3.46092e-07
1275	TXNDC5	1.43763	3.46613e-07
1276	ORAI1	1.47057	3.46657e-07
1277	TCTN3	1.00123	3.52143e-07
1278	SPATA12	2.94709	3.58007e-07
1279	HOXA4	6.5937	3.63056e-07
1280	SH3BGRL	1.0289	3.63966e-07
1281	GTF2IRD2B	1.49908	3.64356e-07
1282	ZNF193	1.15196	3.69644e-07
1283	C7orf31	1.89592	3.77873e-07
1284	ZNF345	1.33785	3.89501e-07
1285	SH3BP2	1.39128	3.91757e-07
1286	LOC100128191	1.85555	3.94493e-07
1287	NUP43	1.05223	3.99456e-07
1288	TIMM8B	1.74575	4.06855e-07
1289	ZCCHC10	1.1689	4.13711e-07
1290	PPIH	1.36635	4.22336e-07
1291	C21orf45	1.18371	4.27654e-07
1292	C19orf50	0.785102	4.2863e-07
1293	NAGS	1.77491	4.39467e-07
1294	XBP1	1.52367	4.42474e-07
1295	SLC35F2	1.82735	4.44969e-07
1296	ZNF217	1.97643	4.45308e-07
1297	GALM	1.67599	4.46378e-07
1298	TPST1	1.78251	4.48796e-07
1299	PATL1	1.21048	4.51953e-07
1300	HLA-DPA1	2.65052	4.56267e-07
1301	SPRY1	2.6048	4.66189e-07
1302	S100PBP	0.945152	4.68811e-07
1303	ENG	1.72163	4.73261e-07
1304	UBE2I	0.740121	4.81427e-07
1305	ABCA1	2.09614	4.84531e-07
1306	NMD3	1.08602	4.8726e-07
1307	MLH1	0.762869	4.89132e-07
1308	C11orf10	1.29391	4.89686e-07
1309	CYB561D2	1.07518	4.90458e-07
1310	C15orf44	0.943607	4.99e-07
1311	HIF1A	1.61362	5.00708e-07
1312	FAM70B	2.02239	5.03621e-07
1313	ADAM9	1.82839	5.07316e-07
1314	ATP6V1B1	3.78712	5.184e-07
1315	GMPPA	0.981045	5.25789e-07
1316	CAPZA1	1.05537	5.28732e-07
1317	BCL2L11	1.26314	5.33736e-07
1318	C1QTNF6	2.41077	5.39647e-07
1319	LFNG	2.57655	5.40696e-07
1320	LOC282997	1.76645	5.49149e-07
1321	EED	0.786568	5.50848e-07
1322	RBMX	1.00429	5.51515e-07
1323	ZNF691	1.06611	5.54295e-07
1324	C1orf54	2.13024	5.57432e-07
1325	H2AFY	0.878	5.6712e-07
1326	GNPDA1	1.01734	5.67553e-07
1327	LOC100216001	3.25618	5.70658e-07
1328	TCF7L1	1.93145	5.79113e-07
1329	LAMA4	2.28202	5.85001e-07
1330	CCRL2	2.16225	5.88247e-07
1331	ACOT9	1.20312	5.91478e-07
1332	S100A6	2.5557	5.92937e-07
1333	MTMR11	1.85582	5.93672e-07
1334	WNT5A	2.17007	6.01361e-07
1335	S100A16	2.3628	6.0193e-07
1336	ARL13B	1.19671	6.05249e-07
1337	SENP1	0.986738	6.13778e-07
1338	FBXW8	1.2773	6.17307e-07
1339	RAF1	0.746215	6.2455e-07
1340	EPHB4	2.32972	6.43811e-07
1341	DCUN1D5	0.942002	6.46082e-07
1342	HEY1	1.74856	6.48445e-07
1343	FAM109B	2.10002	6.51221e-07
1344	CLEC5A	3.91857	6.55855e-07
1345	WDR3	0.950072	6.5663e-07
1346	CD68	2.30782	6.65916e-07
1347	SMAD1	1.22252	6.6776e-07
1348	SNX33	1.24325	6.68067e-07
1349	TOR3A	1.03391	6.69458e-07
1350	MCM8	1.81576	6.81405e-07
1351	FANCG	1.55462	6.83017e-07
1352	ZNF107	1.38225	6.83973e-07
1353	BUD13	0.826309	6.92342e-07
1354	FBL	1.14835	6.99057e-07
1355	ADAMDEC1	5.14286	6.99764e-07
1356	CSTF2	0.792942	7.00222e-07
1357	MGC12982	3.0639	7.0602e-07
1358	RBM7	1.29501	7.13141e-07
1359	EIF3H	0.877811	7.1496e-07
1360	MGAT1	1.04399	7.17052e-07
1361	DSE	1.83253	7.18665e-07
1362	ACTB	1.04494	7.30883e-07
1363	ZNF530	1.60646	7.31289e-07
1364	TRPV4	3.00192	7.36392e-07
1365	SNRPC	1.1486	7.41163e-07
1366	SRPX	3.34028	7.48986e-07
1367	HOXD8	5.26709	7.49822e-07
1368	MS4A7	2.65328	7.50358e-07
1369	CCDC102B	1.71737	7.5165e-07
1370	SP110	1.70908	7.53282e-07
1371	PRC1	2.11173	7.61027e-07
1372	NCAPD2	1.30893	7.61457e-07
1373	LEFTY2	4.15602	7.61803e-07
1374	COMMD4	1.01726	7.77328e-07
1375	SNRPG	1.70254	7.87672e-07
1376	SLC2A10	2.29182	7.91258e-07
1377	AP3B1	0.866236	7.93517e-07
1378	SUCLG2	1.11531	7.94388e-07
1379	ZNF552	1.30057	7.94654e-07
1380	CKAP2	1.62869	7.95091e-07
1381	CREB3L4	1.59998	7.98387e-07
1382	HSPG2	2.61001	7.99219e-07
1383	RPS5	1.98269	8.03156e-07
1384	DIABLO	1.07617	8.06573e-07
1385	GSTP1	1.35885	8.20618e-07
1386	ALKBH2	1.34177	8.22409e-07
1387	SYS1	1.12091	8.46634e-07
1388	CLEC4E	4.1897	8.49332e-07
1389	PDLIM1	2.46853	8.55599e-07
1390	LGTN	1.105	8.57819e-07
1391	PPIA	1.27871	8.72441e-07
1392	ETHE1	1.42451	8.81348e-07
1393	PXN	1.15399	8.84485e-07
1394	OLFML3	1.91944	8.8562e-07
1395	WLS	1.47215	8.86911e-07
1396	SETDB1	0.856812	8.87709e-07
1397	ATL3	1.41316	8.92299e-07
1398	TMEM67	1.645	8.95966e-07
1399	RBM38	1.34744	8.99591e-07
1400	ANKRD22	3.51035	9.06723e-07
1401	DSN1	1.49039	9.12859e-07
1402	C7orf36	1.46338	9.16154e-07
1403	SPNS1	0.948756	9.18943e-07
1404	C18orf54	1.52598	9.19074e-07
1405	PRPF40A	0.720126	9.19443e-07
1406	TMEM168	1.16494	9.22553e-07
1407	HS1BP3	1.09922	9.29455e-07
1408	MND1	2.63007	9.32256e-07
1409	MARVELD1	1.87363	9.34e-07
1410	RBBP7	0.800124	9.35737e-07
1411	LOC400043	2.67538	9.40945e-07
1412	CCDC18	2.10579	9.4121e-07
1413	GATAD2A	1.04833	9.45248e-07
1414	TPM4	1.55195	9.62982e-07
1415	SP100	2.14166	9.70057e-07
1416	NEDD9	1.93334	9.71598e-07
1417	NEXN	2.39052	9.917e-07
1418	SLC12A4	1.21547	9.96928e-07
1419	ECM2	2.54065	1.00893e-06
1420	SP140L	2.36078	1.01411e-06
1421	RBM45	0.593722	1.01649e-06
1422	TRMT2B	0.966177	1.01934e-06
1423	NNMT	4.77993	1.02117e-06
1424	BAK1	1.08678	1.02208e-06
1425	C15orf42	2.51441	1.03035e-06
1426	CCDC138	1.75053	1.07816e-06
1427	FTSJD1	1.04966	1.07874e-06
1428	CORO1C	1.1093	1.07879e-06
1429	ABCC4	1.43785	1.09733e-06
1430	HOXD10	5.70387	1.09978e-06
1431	NUP85	0.810371	1.10852e-06
1432	ADPGK	1.03027	1.11712e-06
1433	XRCC2	2.36504	1.12108e-06
1434	COL5A2	2.73433	1.13933e-06
1435	C7orf23	1.34732	1.14256e-06
1436	C14orf119	1.29364	1.14344e-06
1437	EXT2	1.02286	1.14376e-06
1438	TMOD4	3.60014	1.14802e-06
1439	ZNF528	1.40073	1.14811e-06
1440	ATPAF2	0.81041	1.15515e-06
1441	CD180	2.49397	1.16408e-06
1442	NID2	2.60359	1.17064e-06
1443	RPS8	1.59538	1.18113e-06
1444	SERBP1	0.783613	1.20854e-06
1445	MSI1	1.69633	1.21411e-06
1446	TNNI2	3.20331	1.2342e-06
1447	NSMCE1	0.975137	1.2407e-06
1448	ZNF765	1.23543	1.24567e-06
1449	PDSS1	1.31273	1.25836e-06
1450	GPR108	1.07202	1.26777e-06
1451	TCN2	1.57505	1.2679e-06
1452	C20orf199	1.75752	1.26961e-06
1453	EIF3I	1.09666	1.26973e-06
1454	CAPN2	1.11846	1.27163e-06
1455	TXNDC17	1.48735	1.27661e-06
1456	ZNF501	1.47334	1.27674e-06
1457	ANP32B	1.09461	1.29313e-06
1458	TRIM14	1.60578	1.2998e-06
1459	DOK3	2.01369	1.30002e-06
1460	EIF3D	0.938882	1.30377e-06
1461	FAM114A1	1.82809	1.32404e-06
1462	RBMS2	1.04923	1.33295e-06
1463	CXCL10	4.2159	1.33765e-06
1464	CNTLN	1.79564	1.33865e-06
1465	TMSB15B	2.26303	1.34403e-06
1466	MEOX2	5.30639	1.3453e-06
1467	NCF2	2.1973	1.34582e-06
1468	POLD1	1.55412	1.35318e-06
1469	EML4	1.11052	1.36204e-06
1470	PSMC2	0.888596	1.36211e-06
1471	SFRS13A	0.655512	1.36759e-06
1472	BLMH	0.819192	1.38578e-06
1473	SRA1	1.17824	1.41056e-06
1474	SEPX1	1.29635	1.43077e-06
1475	LYZ	3.45593	1.43334e-06
1476	DNAJC1	1.12591	1.44058e-06
1477	JAGN1	1.00324	1.45215e-06
1478	LIPT1	1.16408	1.4558e-06
1479	DEK	1.08111	1.50033e-06
1480	PLK4	2.05866	1.51344e-06
1481	CDT1	2.29589	1.51455e-06
1482	FBXO30	1.12873	1.51785e-06
1483	ARL11	2.42913	1.53561e-06
1484	MRPL13	1.45578	1.54414e-06
1485	PSKH1	1.06003	1.545e-06
1486	UCP2	2.04364	1.55679e-06
1487	PMF1	1.06669	1.572e-06
1488	CFI	3.05361	1.58259e-06
1489	PVRL2	1.39564	1.58944e-06
1490	VANGL2	1.83302	1.59098e-06
1491	TMED10	0.991315	1.59435e-06
1492	EIF3E	1.21033	1.59461e-06
1493	E2F6	0.817718	1.59899e-06
1494	SNAPC1	1.26997	1.60321e-06
1495	POLM	1.15445	1.61756e-06
1496	HPS5	1.04974	1.61991e-06
1497	FBXO39	3.48762	1.62956e-06
1498	ZNF300	2.28715	1.63476e-06
1499	C1orf203	1.59687	1.64516e-06
1500	PGF	2.61207	1.66096e-06
1501	BANF1	1.22328	1.66748e-06
1502	BPGM	0.983532	1.67614e-06
1503	LYPLA2P1	1.03245	1.71662e-06
1504	GABPA	0.802109	1.73939e-06
1505	SPSB4	2.81752	1.75394e-06
1506	CLEC18B	3.10008	1.76263e-06
1507	MYL12A	1.78689	1.76776e-06
1508	SLAMF7	3.18725	1.77899e-06
1509	BLM	2.07266	1.78037e-06
1510	LIN9	1.53717	1.79427e-06
1511	NOL10	0.749121	1.79554e-06
1512	NOC3L	0.881201	1.81326e-06
1513	CANX	0.883146	1.81485e-06
1514	CARD16	2.97093	1.81924e-06
1515	LRRC25	2.42385	1.81988e-06
1516	ERLIN2	0.943875	1.82703e-06
1517	TRAF3IP2	1.4502	1.84365e-06
1518	VNN2	3.11866	1.84956e-06
1519	MLX	0.946838	1.85705e-06
1520	TGDS	1.38564	1.86098e-06
1521	TRA2B	0.727908	1.90573e-06
1522	FCGR2C	3.24431	1.91529e-06
1523	KCTD5	0.912702	1.93319e-06
1524	C7orf27	1.14379	1.94043e-06
1525	NOP14	0.663855	1.94653e-06
1526	TARS	0.741151	1.95638e-06
1527	F11R	1.70706	1.97268e-06
1528	SOX11	3.32736	1.97608e-06
1529	LOC645332	1.18407	1.99774e-06
1530	IL1R2	4.89743	1.99842e-06
1531	POLA2	1.22323	2.00163e-06
1532	DPM2	1.03474	2.00394e-06
1533	ZNF502	1.35519	2.0116e-06
1534	CLCF1	3.21074	2.01544e-06
1535	IFRD1	1.13536	2.01565e-06
1536	RRP8	1.03542	2.03198e-06
1537	RAB10	0.674052	2.03703e-06
1538	MED17	0.655731	2.04378e-06
1539	SLC11A1	2.80853	2.05042e-06
1540	HOXB2	5.15352	2.05172e-06
1541	BRIX1	0.911976	2.06843e-06
1542	ELAC1	0.995271	2.07388e-06
1543	TAX1BP3	1.39162	2.07479e-06
1544	HADHA	0.577764	2.07538e-06
1545	CLPP	1.12186	2.08488e-06
1546	LOX	3.87437	2.08651e-06
1547	S100A10	3.1631	2.10574e-06
1548	SRFBP1	0.794886	2.11623e-06
1549	LRP10	1.3609	2.11914e-06
1550	LSM7	1.58678	2.12168e-06
1551	TREM2	2.47998	2.12389e-06
1552	WDR12	0.854522	2.13597e-06
1553	CCDC99	1.17702	2.17909e-06
1554	PHLDA1	1.96858	2.17977e-06
1555	C7orf30	1.12526	2.19737e-06
1556	SOX2	1.98509	2.2046e-06
1557	ZNF143	0.666243	2.20697e-06
1558	CRLF3	0.999601	2.2104e-06
1559	TIMP1	3.16831	2.21398e-06
1560	CDCA5	2.12557	2.2561e-06
1561	TWSG1	1.6985	2.27426e-06
1562	C12orf23	1.0147	2.27746e-06
1563	FUCA2	1.4085	2.29116e-06
1564	NCF4	2.18479	2.31428e-06
1565	FXYD5	1.93959	2.31555e-06
1566	SDF4	0.867127	2.33565e-06
1567	ZBTB9	0.840424	2.34798e-06
1568	PTGFRN	1.70132	2.34917e-06
1569	PRR14	0.825801	2.36e-06
1570	ZNF548	1.12491	2.41404e-06
1571	WDR70	0.713959	2.41903e-06
1572	ARHGAP11B	2.87069	2.43442e-06
1573	CENPW	2.0636	2.44966e-06
1574	CBLB	1.30397	2.45067e-06
1575	B3GNT5	1.87759	2.4507e-06
1576	UBE2A	1.00055	2.45353e-06
1577	IPO4	1.23558	2.48622e-06
1578	EBPL	1.26934	2.49674e-06
1579	STK10	1.37626	2.50516e-06
1580	TULP3	1.08139	2.52079e-06
1581	HOXD4	4.49941	2.5267e-06
1582	C22orf13	0.911857	2.52843e-06
1583	POC1A	1.75683	2.54597e-06
1584	PTX3	4.03034	2.5638e-06
1585	LAMB4	2.89637	2.58002e-06
1586	ABCD1	1.33879	2.61703e-06
1587	CAPRIN1	0.56336	2.63923e-06
1588	BAT1	0.859746	2.63974e-06
1589	SOX4	2.81985	2.64134e-06
1590	SAMD9	2.33126	2.68349e-06
1591	PSME1	1.46162	2.70415e-06
1592	THOC6	1.03056	2.70437e-06
1593	CISH	2.43851	2.70819e-06
1594	FAM115C	2.76917	2.71935e-06
1595	ANXA2P1	2.46844	2.7288e-06
1596	PABPC4L	2.41151	2.74188e-06
1597	CEBPD	2.18589	2.74624e-06
1598	CLEC12A	4.24083	2.75763e-06
1599	PCDH18	1.8846	2.75887e-06
1600	TMEM79	1.08616	2.76066e-06
1601	TSPO	1.79665	2.76412e-06
1602	TMEM106A	2.02573	2.79058e-06
1603	PLEKHH3	1.21594	2.8055e-06
1604	SNTB1	1.47419	2.80561e-06
1605	TMEM116	1.2461	2.80822e-06
1606	IL15RA	2.02262	2.81573e-06
1607	KIAA0391	1.04003	2.82433e-06
1608	PIGN	1.01377	2.83304e-06
1609	SYPL1	1.47794	2.83454e-06
1610	LGALS3BP	1.80901	2.84644e-06
1611	RNASE6	2.26946	2.86009e-06
1612	SLC16A1	1.17877	2.87743e-06
1613	PLOD2	2.08833	2.89561e-06
1614	PECAM1	1.49673	2.90376e-06
1615	POLR2D	0.802868	2.90892e-06
1616	PSMG2	0.907684	2.90924e-06
1617	FCGR2B	4.40302	2.95542e-06
1618	EIF2B2	0.824042	2.96155e-06
1619	ITPA	1.06433	2.97263e-06
1620	CXCL9	4.04323	2.97553e-06
1621	SERPINE1	3.78578	2.97985e-06
1622	ZNF800	0.849997	2.98005e-06
1623	RPE65	3.7632	2.98129e-06
1624	C10orf55	2.93126	2.9823e-06
1625	APRT	1.2403	2.99203e-06
1626	CHAC2	1.44545	2.9921e-06
1627	NADK	0.789918	3.00603e-06
1628	RPL11	1.10527	3.02024e-06
1629	HOXD11	5.52638	3.02402e-06
1630	PDGFC	1.82219	3.02807e-06
1631	ARHGEF19	2.1489	3.03721e-06
1632	PGM3	1.17849	3.04351e-06
1633	SHQ1	0.830724	3.05148e-06
1634	C14orf143	1.125	3.05284e-06
1635	GDF15	3.63826	3.05672e-06
1636	HUS1	0.919486	3.07935e-06
1637	FAM18B	0.989275	3.0862e-06
1638	RQCD1	0.847444	3.10293e-06
1639	TSKU	1.85745	3.11331e-06
1640	GNS	1.38606	3.12439e-06
1641	MTERFD1	0.996183	3.13563e-06
1642	LARP7	0.867777	3.14843e-06
1643	RUNX1	2.42984	3.15983e-06
1644	LHX9	5.16765	3.17788e-06
1645	TMEM5	0.973418	3.18255e-06
1646	RPS3	1.5668	3.18388e-06
1647	COMMD10	1.60119	3.18895e-06
1648	PQLC3	1.83432	3.19565e-06
1649	CD300A	2.21484	3.19824e-06
1650	ARMCX6	1.00126	3.23199e-06
1651	USP28	0.891258	3.29256e-06
1652	SMURF2	0.787908	3.29562e-06
1653	AHCY	1.20777	3.31151e-06
1654	SRR	1.12634	3.34768e-06
1655	PINX1	1.01354	3.35357e-06
1656	CD164	1.32994	3.39734e-06
1657	CD74	2.31661	3.41198e-06
1658	ISL2	3.51496	3.42221e-06
1659	RWDD4A	0.933143	3.55154e-06
1660	OTP	5.28592	3.55467e-06
1661	C7orf55	1.6087	3.5576e-06
1662	SERF2	1.39355	3.55942e-06
1663	C14orf64	2.2722	3.58051e-06
1664	SPATA5	1.07494	3.60517e-06
1665	FOXD3	4.21752	3.60775e-06
1666	SIGLEC9	2.42485	3.61659e-06
1667	HSPB1	1.79238	3.61699e-06
1668	NCAPG2	1.62502	3.62398e-06
1669	ETV2	2.34674	3.6473e-06
1670	POLR3GL	0.737546	3.65887e-06
1671	SLAIN2	0.769225	3.66097e-06
1672	FZD7	2.59243	3.71112e-06
1673	CCDC52	1.13499	3.73451e-06
1674	LRRN4CL	3.26244	3.74795e-06
1675	ALG2	0.881365	3.74959e-06
1676	ACTG1	0.914308	3.75167e-06
1677	GTF2IRD2	1.30644	3.7567e-06
1678	LSM12	0.614568	3.75988e-06
1679	RAG1AP1	1.38505	3.77489e-06
1680	RUFY1	0.880483	3.78693e-06
1681	SMARCC1	1.25	3.79634e-06
1682	SAMD13	1.62576	3.79892e-06
1683	SLC25A15	1.31885	3.83161e-06
1684	RBMX2	0.849264	3.83457e-06
1685	DIAPH1	0.983927	3.84404e-06
1686	SLC35B1	0.719066	3.85882e-06
1687	ZNF394	0.629109	3.90571e-06
1688	C7orf28B	1.65778	3.90787e-06
1689	AKR1A1	1.05407	3.91074e-06
1690	CCNG1	1.13408	3.91187e-06
1691	SHKBP1	1.07988	3.92367e-06
1692	LOC407835	0.951332	3.94936e-06
1693	NKX3-2	4.0267	4.00112e-06
1694	FBLIM1	2.88687	4.00282e-06
1695	TMEM140	1.44817	4.00648e-06
1696	TSPAN12	2.72502	4.01596e-06
1697	TMEM102	1.34048	4.03333e-06
1698	RBM4	0.793521	4.0545e-06
1699	ETV4	3.63703	4.0687e-06
1700	C17orf82	2.63722	4.07795e-06
1701	LOC154761	2.88819	4.0834e-06
1702	MAP3K1	1.63046	4.11791e-06
1703	RIPK2	0.918795	4.13306e-06
1704	RBM22	0.624911	4.14585e-06
1705	PAK2	0.729049	4.14843e-06
1706	MTCP1NB	1.27704	4.21954e-06
1707	C19orf24	1.16622	4.22572e-06
1708	TEAD3	2.06242	4.23227e-06
1709	EIF3M	0.846766	4.31222e-06
1710	SCNM1	1.06889	4.31617e-06
1711	C15orf39	1.39147	4.31711e-06
1712	CTSS	2.38184	4.33207e-06
1713	PRMT3	1.23071	4.33966e-06
1714	TYROBP	2.31072	4.34563e-06
1715	PDE6C	0.952074	4.38099e-06
1716	TLR3	2.05952	4.42719e-06
1717	PRPH	2.93863	4.42815e-06
1718	PDLIM3	2.3108	4.44704e-06
1719	C1QC	2.35045	4.48524e-06
1720	WARS2	1.00602	4.49638e-06
1721	ZNF486	1.74528	4.51919e-06
1722	RPAP2	0.982998	4.53944e-06
1723	RAB27A	1.99457	4.58027e-06
1724	PAPOLA	0.724324	4.59969e-06
1725	CENPO	1.16154	4.608e-06
1726	TRIM25	1.13951	4.62536e-06
1727	DOLK	0.750195	4.66443e-06
1728	CABP4	2.44645	4.66893e-06
1729	MAGOH	0.946065	4.72892e-06
1730	C14orf147	1.22033	4.73812e-06
1731	ZNF434	0.785391	4.74155e-06
1732	DEDD	0.534864	4.76299e-06
1733	LGALS1	2.11493	4.76664e-06
1734	HLA-C	2.07109	4.76938e-06
1735	HIBADH	1.21967	4.78216e-06
1736	C1R	2.769	4.78823e-06
1737	FAM83D	2.65388	4.79331e-06
1738	PSME3	0.599612	4.79944e-06
1739	ZNF45	0.97802	4.87771e-06
1740	IGFBP3	3.75958	4.88139e-06
1741	DULLARD	0.588984	4.95361e-06
1742	TUBB	1.16367	4.96425e-06
1743	AMMECR1L	0.664093	4.98155e-06
1744	DDAH2	0.978146	4.98844e-06
1745	CAPN7	0.707186	4.99619e-06
1746	PTPN22	2.86724	5.00675e-06
1747	HLA-DPB1	2.36039	5.00829e-06
1748	C19orf43	0.94477	5.01695e-06
1749	DUSP12	0.826193	5.05208e-06
1750	AGXT2L2	1.10205	5.10609e-06
1751	SERPINA5	3.57056	5.13008e-06
1752	RPS13	1.36116	5.16125e-06
1753	SH2D4A	2.56017	5.17018e-06
1754	C17orf80	0.787645	5.18036e-06
1755	LAG3	2.55065	5.21116e-06
1756	TMSL3	1.58495	5.23118e-06
1757	ADAMTS12	3.87892	5.23483e-06
1758	RAC2	2.13709	5.23716e-06
1759	SDSL	1.50451	5.25623e-06
1760	SSRP1	0.803276	5.29829e-06
1761	GLYCTK	1.24965	5.33534e-06
1762	EDNRA	2.05195	5.34123e-06
1763	CARD6	2.05597	5.34902e-06
1764	ADAP2	1.71499	5.36058e-06
1765	MIR155HG	2.93982	5.36434e-06
1766	RIOK2	0.662036	5.36673e-06
1767	RMI1	1.27967	5.38977e-06
1768	HIST1H3H	2.97967	5.40056e-06
1769	MMP25	2.71677	5.40813e-06
1770	C1QB	2.43628	5.53268e-06
1771	SURF4	0.942373	5.5482e-06
1772	ERP27	3.39216	5.56761e-06
1773	OSGEPL1	1.03465	5.57558e-06
1774	UBAC2	0.822166	5.63919e-06
1775	SILV	2.73953	5.64554e-06
1776	HOXC10	6.33088	5.6562e-06
1777	DPYD	2.58976	5.70304e-06
1778	CRYZ	1.53525	5.78556e-06
1779	BACE2	2.18778	5.81538e-06
1780	GLE1	0.809611	5.82998e-06
1781	CTNNA1	0.843398	5.86872e-06
1782	INTS7	1.06469	5.88988e-06
1783	EGFLAM	2.88627	5.89979e-06
1784	UNC93B1	1.63363	5.96731e-06
1785	ANGPTL2	1.8771	6.01458e-06
1786	LSM1	1.01105	6.04646e-06
1787	MITD1	0.98992	6.07424e-06
1788	SSR3	1.17924	6.09977e-06
1789	ZKSCAN5	0.766865	6.11417e-06
1790	NIP7	0.99781	6.15648e-06
1791	C1orf156	0.9569	6.17752e-06
1792	P4HA1	1.65744	6.18774e-06
1793	ZNF410	1.206	6.25839e-06
1794	FKBP9	1.69116	6.27909e-06
1795	USP1	0.949635	6.31268e-06
1796	CTNND1	0.961054	6.32667e-06
1797	IL7	2.71166	6.33648e-06
1798	C1QTNF1	2.65469	6.55463e-06
1799	HOMER3	1.09342	6.60009e-06
1800	MGST2	1.55088	6.61775e-06
1801	RPL35A	1.39735	6.61808e-06
1802	UBIAD1	0.724902	6.61892e-06
1803	LAIR1	2.29416	6.71015e-06
1804	C19orf10	1.19479	6.74579e-06
1805	KCTD3	0.915553	6.76465e-06
1806	FDX1	0.913432	6.84849e-06
1807	RPA3	1.45966	6.84999e-06
1808	DVL2	0.87588	6.85718e-06
1809	ZNF124	1.63989	6.89767e-06
1810	ZNF586	1.07782	6.90323e-06
1811	LEPROT	1.26609	6.92538e-06
1812	MED11	1.07384	6.96321e-06
1813	NOP2	0.957882	6.99932e-06
1814	C10orf81	4.43314	7.04506e-06
1815	ASB9	2.66585	7.04992e-06
1816	DAB2	1.97503	7.07543e-06
1817	RBCK1	0.978123	7.08156e-06
1818	TMEM123	1.08857	7.09004e-06
1819	ATRIP	0.840013	7.1491e-06
1820	TRIOBP	1.04818	7.1511e-06
1821	SNRPB	1.35146	7.16698e-06
1822	ARAP3	2.02252	7.17647e-06
1823	HSPA6	2.71747	7.17839e-06
1824	HFE	2.28681	7.2498e-06
1825	GMFG	2.01984	7.25032e-06
1826	VGLL4	1.0055	7.26014e-06
1827	FAM119B	3.0401	7.28104e-06
1828	C6orf48	1.15712	7.29498e-06
1829	SRRM5	1.19121	7.29899e-06
1830	DAP3	0.80152	7.3476e-06
1831	MCM9	1.39367	7.36179e-06
1832	LOC100170939	1.57756	7.3893e-06
1833	IRX3	3.9523	7.40859e-06
1834	C8orf31	1.45335	7.42495e-06
1835	PIPSL	0.594652	7.54066e-06
1836	SGPL1	0.824287	7.55628e-06
1837	IRF2	1.00375	7.66783e-06
1838	HADH	0.96244	7.77614e-06
1839	UTP18	0.733018	7.88888e-06
1840	WBSCR22	0.830966	7.91432e-06
1841	SPATA17	3.13065	7.92279e-06
1842	NME2	1.30734	7.99585e-06
1843	EIF2AK1	0.733858	8.03987e-06
1844	CCNJL	1.61373	8.04519e-06
1845	RARS2	1.12015	8.04608e-06
1846	CTSO	1.36323	8.08576e-06
1847	LOC100132707	1.68339	8.12157e-06
1848	C1QA	2.42545	8.13885e-06
1849	TBXA2R	1.84122	8.15147e-06
1850	SERPINB8	1.40121	8.20117e-06
1851	PHB	0.966469	8.25551e-06
1852	HPS3	0.993847	8.25958e-06
1853	THBS3	1.65426	8.30472e-06
1854	CERKL	2.5207	8.30497e-06
1855	KIAA0922	1.54061	8.35872e-06
1856	LOC550112	1.14767	8.44609e-06
1857	STK33	2.19781	8.49092e-06
1858	GALNT10	1.55129	8.50023e-06
1859	NUP62	0.837636	8.51149e-06
1860	SCP2	0.686027	8.6215e-06
1861	RRM1	1.04483	8.62917e-06
1862	BUD31	1.20969	8.65635e-06
1863	MYO1G	2.90595	8.75162e-06
1864	SFT2D2	1.36998	8.7559e-06
1865	REPIN1	1.02021	8.76896e-06
1866	SPATA6	1.74485	8.83757e-06
1867	ZNF92	1.11931	8.8537e-06
1868	PNO1	1.04244	8.89628e-06
1869	C1GALT1C1	1.03712	8.95649e-06
1870	RPS27L	1.65053	9.00252e-06
1871	TAF1B	0.876015	9.07764e-06
1872	MTBP	1.76096	9.08881e-06
1873	F2RL2	3.26293	9.22107e-06
1874	RPS3A	1.74898	9.24903e-06
1875	LAPTM4B	1.27634	9.3532e-06
1876	C6orf62	0.827388	9.49158e-06
1877	TRIB3	2.31058	9.51925e-06
1878	DHX15	0.651979	9.54788e-06
1879	PRSS23	2.22061	9.59556e-06
1880	CA9	5.47942	9.61225e-06
1881	KCTD11	1.07962	9.65564e-06
1882	CEP152	1.73809	9.66337e-06
1883	TARBP2	1.19445	9.74876e-06
1884	DDX56	0.869579	9.76415e-06
1885	LITAF	1.1737	9.76756e-06
1886	CCDC125	1.43324	9.79675e-06
1887	TEX9	1.94493	9.80027e-06
1888	ZSWIM4	1.33122	9.80407e-06
1889	CA12	3.36283	9.85491e-06
1890	RHOJ	1.90169	9.88173e-06
1891	EFEMP1	2.95234	9.93498e-06
1892	ADAM12	2.86258	9.95271e-06
1893	MRPL50	1.02287	9.95885e-06
1894	DDB2	1.58595	9.99538e-06
1895	POLE3	1.09964	1.00666e-05
1896	IL18BP	1.47269	1.02018e-05
1897	SAT1	1.82955	1.02906e-05
1898	ARHGAP17	0.850373	1.0303e-05
1899	DIMT1L	0.979279	1.03053e-05
1900	SNX20	2.14616	1.03573e-05
1901	IKBKE	1.67298	1.04059e-05
1902	DDX20	0.754364	1.04155e-05
1903	POSTN	6.40566	1.04224e-05
1904	ALOX5AP	2.55958	1.04327e-05
1905	GPR89A	0.728782	1.04337e-05
1906	SLC35B2	0.99509	1.04527e-05
1907	ACY1	1.15563	1.05178e-05
1908	DDX31	0.895472	1.06649e-05
1909	LYN	1.64337	1.07315e-05
1910	MBOAT1	2.1487	1.07366e-05
1911	DYRK4	0.997645	1.0829e-05
1912	TRAF4	2.02197	1.08591e-05
1913	OLFML2A	1.9243	1.09237e-05
1914	FAM200A	0.918714	1.09878e-05
1915	TMEM204	1.69643	1.10767e-05
1916	COL1A1	4.337	1.11648e-05
1917	QSER1	0.931614	1.12052e-05
1918	SNCAIP	2.25458	1.12092e-05
1919	NOD2	2.48585	1.1259e-05
1920	MED30	1.10031	1.12991e-05
1921	KLHL20	0.728513	1.13488e-05
1922	ASTE1	0.798629	1.13775e-05
1923	ZNF311	2.09988	1.1421e-05
1924	ZNF627	1.41244	1.1433e-05
1925	LRGUK	2.93337	1.14389e-05
1926	SHISA5	0.934219	1.15385e-05
1927	LLPH	0.952836	1.15617e-05
1928	MRPL3	0.712157	1.16316e-05
1929	RHOH	2.35203	1.16475e-05
1930	IFI35	1.98524	1.16531e-05
1931	P2RX4	1.08583	1.16647e-05
1932	IL2RG	2.41017	1.16974e-05
1933	C1orf55	0.733755	1.17997e-05
1934	LAPTM5	2.08617	1.18064e-05
1935	DYRK3	1.56541	1.1825e-05
1936	SLC26A6	1.29975	1.18279e-05
1937	SP1	0.896137	1.18327e-05
1938	TRIM22	2.12487	1.18483e-05
1939	ATF1	0.938726	1.18518e-05
1940	C7orf11	1.33152	1.18604e-05
1941	CXorf64	3.74973	1.18687e-05
1942	CDYL	0.840031	1.19126e-05
1943	RAP1A	0.864422	1.19819e-05
1944	GAB3	1.61834	1.19824e-05
1945	PCDH12	2.05054	1.20304e-05
1946	TYMP	2.30453	1.2038e-05
1947	SLAMF8	2.72193	1.21716e-05
1948	RAET1K	2.46052	1.22743e-05
1949	FKBP14	1.27612	1.24045e-05
1950	AQP1	3.58122	1.24129e-05
1951	TNFAIP8	2.07442	1.246e-05
1952	PLVAP	2.45204	1.25454e-05
1953	EFEMP2	2.03273	1.25569e-05
1954	HIST1H2AG	2.87389	1.25659e-05
1955	TMEM11	0.723641	1.26018e-05
1956	CCDC97	0.800762	1.268e-05
1957	SLC47A2	3.84236	1.27252e-05
1958	ZNF555	0.982638	1.28327e-05
1959	EEF1D	0.928348	1.28339e-05
1960	ATP6V0A2	0.827289	1.28832e-05
1961	PXDN	2.37888	1.28969e-05
1962	C1orf83	0.734232	1.29048e-05
1963	CHI3L1	4.92262	1.29049e-05
1964	ADAMTS9	2.22115	1.29495e-05
1965	PLTP	2.08332	1.29786e-05
1966	NME6	1.10686	1.30817e-05
1967	RBM12	0.628324	1.31243e-05
1968	HIATL1	0.707841	1.31474e-05
1969	CYTIP	2.35049	1.31933e-05
1970	EMILIN2	2.47095	1.32081e-05
1971	BGN	1.96957	1.32274e-05
1972	TMED2	0.964476	1.33474e-05
1973	ARPC1B	1.74598	1.33572e-05
1974	COMMD2	1.13988	1.33818e-05
1975	CA3	4.76677	1.34392e-05
1976	MMP11	2.74802	1.34613e-05
1977	SHC1	1.79669	1.3466e-05
1978	C1orf124	0.67541	1.34741e-05
1979	CKAP4	1.18712	1.34869e-05
1980	SELS	1.01858	1.35263e-05
1981	NLRC5	1.72448	1.3548e-05
1982	NUDCD2	1.10177	1.35819e-05
1983	CDK2AP2	0.941562	1.36215e-05
1984	C4orf43	0.846815	1.36933e-05
1985	RNF138	0.850106	1.3811e-05
1986	BOD1	1.0627	1.3858e-05
1987	AGBL5	0.817098	1.39336e-05
1988	MYOF	2.02618	1.39598e-05
1989	GNA12	1.05704	1.41951e-05
1990	NCF1C	2.67343	1.43167e-05
1991	POLR2H	0.990153	1.43329e-05
1992	GGPS1	0.633207	1.44131e-05
1993	C11orf57	0.684009	1.44255e-05
1994	NR1H3	1.23253	1.46676e-05
1995	ZNF35	0.998067	1.47044e-05
1996	TEAD1	1.22582	1.48218e-05
1997	PDZD11	1.07995	1.48722e-05
1998	SRPRB	1.01825	1.49549e-05
[truncated: 3,076 more rows]
