# Supplementary material for: PITAR, a DNA damage-inducible Cancer/Testis long noncoding RNA, inactivates p53 by binding and stabilizing TRIM28 mRNA
Source: bioRxiv preprint, doi:10.1101/2023.04.11.536370, version 2 (2024-04-01)
Supplement: Supplementary Table 5.xlsx [file 536370_file07.xlsx]

## Sheet: Supplementary Table 5
Supplementary Table 5: Differentially expressed Genes in GSC - DGC
Sr. No	Gene_name	log2fc(GSC-DGC)#	p value*
1	S100B	7.78062	6.4714e-16
2	NAT8L	5.50109	1.96987e-14
3	FREM2	4.47353	6.11137e-14
4	PTPRZ1	7.69062	6.3786e-14
5	SOX8	6.53306	6.50455e-13
6	OLIG2	7.36392	7.70722e-13
7	COL20A1	7.13551	7.86711e-13
8	OLIG1	7.70295	8.81158e-13
9	NCAN	7.71439	1.37874e-12
10	PREX1	2.96808	1.68448e-12
11	TTYH1	7.16399	2.0719e-12
12	KCNJ10	4.71972	2.12418e-12
13	MAGED2	1.76106	2.92661e-12
14	ACSS1	6.17261	3.48979e-12
15	TRAF4	2.14209	4.2247e-12
16	GNG4	4.46925	4.3118e-12
17	CAMKV	3.21855	4.63581e-12
18	LOC100127888	5.17311	6.40545e-12
19	TUBB2B	3.5287	1.04778e-11
20	NDRG2	5.77276	1.08613e-11
21	TEX15	4.33601	1.26595e-11
22	SNRPD1	1.52787	1.26627e-11
23	AIF1L	5.75009	1.36281e-11
24	NKAIN1	5.09261	1.43734e-11
25	RUVBL1	1.05922	1.60055e-11
26	MMP15	3.07302	2.00215e-11
27	RIPPLY2	2.9354	3.21362e-11
28	SOX2	5.56713	3.23789e-11
29	APRT	1.22375	3.56527e-11
30	BCAN	5.71634	4.19051e-11
31	COL9A3	6.62931	4.21563e-11
32	HSPD1	1.59465	4.92853e-11
33	CHADL	6.50414	5.01698e-11
34	COBL	5.1244	1.08901e-10
35	METRN	3.48141	1.33265e-10
36	TMPRSS5	4.67838	1.40768e-10
37	SLC35F1	5.37084	1.65052e-10
38	MAST1	3.66675	1.73477e-10
39	GAS7	6.15141	1.76216e-10
40	LOC100499467	2.95617	1.92839e-10
41	MYBL2	2.03514	1.94278e-10
42	BRSK2	4.65743	2.44021e-10
43	MAP2	5.32239	2.60845e-10
44	TMEM145	4.38909	2.87231e-10
45	WNK2	3.90266	3.00601e-10
46	MYH14	4.75303	3.52664e-10
47	POLR2F	1.34339	4.41526e-10
48	ARHGDIG	3.20496	5.07236e-10
49	CACYBP	1.14944	5.3595e-10
50	BK250D10.8	3.19057	5.87428e-10
51	RLBP1	4.76977	5.90411e-10
52	CERS1	4.00602	6.016e-10
53	PCCB	1.72068	6.01972e-10
54	GCSH	1.88316	6.5433e-10
55	GLDC	5.27636	8.52119e-10
56	PMP2	7.40777	8.98397e-10
57	NLGN3	4.28306	9.11129e-10
58	LOC729080	1.97279	1.05756e-09
59	ASCL1	5.52087	1.10242e-09
60	SCG3	4.35785	1.1139e-09
61	PRPF38A	1.31063	1.29365e-09
62	C8orf46	4.16855	1.48652e-09
63	NUP210	5.46447	1.56431e-09
64	RAP1GAP	4.55312	2.0047e-09
65	HNRNPA3	1.6557	2.00958e-09
66	C11orf31	1.15813	2.05128e-09
67	FAM59B	4.69168	2.17476e-09
68	GPM6B	5.7736	3.37979e-09
69	LAMC3	3.7729	3.50413e-09
70	SOX5	4.54479	3.55227e-09
71	DHODH	1.86807	3.67559e-09
72	FAM198A	3.56597	3.68911e-09
73	PLP1	6.41927	3.70245e-09
74	PODXL2	5.49413	3.70625e-09
75	ATP1B2	5.72391	3.71557e-09
76	IQCK	4.03872	4.00242e-09
77	BMP7	6.46347	4.23871e-09
78	SLC25A13	1.95543	4.34423e-09
79	PARP1	1.25945	5.32614e-09
80	BMP8B	5.3187	5.46331e-09
81	SLC25A33	1.42336	5.92511e-09
82	POU3F3	4.90725	5.99045e-09
83	LPPR5	5.12984	6.05026e-09
84	CNTFR	5.11424	7.2129e-09
85	FGFBP3	5.47587	7.65802e-09
86	SOX1	5.12232	8.04303e-09
87	CPXM1	6.79968	8.7112e-09
88	MAP3K1	2.94914	8.86541e-09
89	DBI	2.425	9.00149e-09
90	FOSB	5.42655	9.07523e-09
91	ZNF276	1.89991	9.4152e-09
92	CORO7	2.16259	1.01122e-08
93	ATG4D	0.858227	1.03025e-08
94	NOTCH1	2.84329	1.05406e-08
95	RTN4RL2	2.99724	1.0868e-08
96	SEC11C	1.99338	1.19931e-08
97	PHF21B	2.81811	1.22095e-08
98	PDE3B	2.89289	1.26913e-08
99	LAPTM4B	2.05971	1.29666e-08
100	ODC1	1.57457	1.41509e-08
101	LGI2	6.35764	1.53479e-08
102	POU3F2	4.2735	1.56034e-08
103	PLLP	4.7445	1.62494e-08
104	FAM155B	3.25922	1.63211e-08
105	HEY2	4.52781	1.72738e-08
106	SOX21	4.77519	1.96258e-08
107	RNF157	5.09277	2.01416e-08
108	NOL12	1.97085	2.11128e-08
109	SARNP	0.710522	2.28738e-08
110	PHB	1.11617	2.40474e-08
111	LINC00467	1.59157	2.48427e-08
112	PAQR6	1.93956	2.48726e-08
113	ELOVL2	4.22531	2.49106e-08
114	LOC100506421	5.04025	2.51685e-08
115	SORD	1.69303	2.87536e-08
116	NOP56	1.77452	2.88225e-08
117	GPRC5B	4.17545	2.98673e-08
118	GRIK3	4.86332	3.0935e-08
119	LRRC4	3.96639	3.13031e-08
120	ATP5G2	1.17019	3.33716e-08
121	SAPCD2	2.52651	3.71054e-08
122	GNG7	4.01063	3.91782e-08
123	GOLM1	2.18129	4.02083e-08
124	ENHO	3.10929	4.36833e-08
125	GLB1L2	5.66671	4.39327e-08
126	EYA2	5.13054	4.55897e-08
127	LOC641746	1.98971	4.59609e-08
128	LSAMP	3.6234	4.69177e-08
129	HES6	3.86762	4.87205e-08
130	CSE1L	0.735345	5.12769e-08
131	PAFAH1B3	1.80303	5.21298e-08
132	DPYSL5	5.35274	5.40314e-08
133	ANKRD13B	1.74976	5.42132e-08
134	PELI1	3.74771	5.5515e-08
135	KCNQ2	5.83579	5.56076e-08
136	SCRG1	5.96153	5.66857e-08
137	NTN1	4.43422	5.77691e-08
138	C2orf72	4.33917	5.93486e-08
139	FASN	1.55444	6.043e-08
140	OIP5-AS1	1.48138	6.09403e-08
141	B4GALNT4	1.96515	6.25966e-08
142	MCM6	0.747998	6.37051e-08
143	DHX34	1.39619	6.48252e-08
144	FAM178B	2.45826	6.5892e-08
145	MLXIP	1.54499	6.62936e-08
146	CCDC12	1.06101	6.652e-08
147	LSM7	1.16861	6.76336e-08
148	NDUFAB1	1.05876	7.01761e-08
149	ETV1	1.92187	7.27689e-08
150	POLR3K	1.19411	7.83123e-08
151	HNRPDL	0.904146	7.94618e-08
152	GLUL	1.35899	8.2729e-08
153	SBK1	3.83175	8.29218e-08
154	CBX3	1.45189	8.62514e-08
155	PLXNB1	1.68509	8.65337e-08
156	MRTO4	1.05137	8.658e-08
157	TCFL5	3.7027	8.76289e-08
158	C16orf74	3.86615	8.76919e-08
159	SNRPD3	1.32289	8.8777e-08
160	SMARCD1	1.1226	9.04617e-08
161	PLEKHB1	4.59364	9.10798e-08
162	TRAP1	1.88554	9.14511e-08
163	NDUFA7	1.37136	9.23068e-08
164	KRI1	0.877491	9.25214e-08
165	DHRS13	3.15448	9.33782e-08
166	TBRG4	0.990946	9.57015e-08
167	WDR77	1.70181	9.62835e-08
168	TPD52	3.56991	1.02417e-07
169	FDPS	1.62099	1.10078e-07
170	SNRNP25	1.58681	1.10449e-07
171	C19orf57	2.0822	1.13798e-07
172	HRASLS	4.12674	1.19496e-07
173	LOC100192204	0.712187	1.19838e-07
174	CDC45	1.12154	1.1997e-07
175	LRP8	2.76684	1.3159e-07
176	NDUFB9	1.20827	1.34481e-07
177	LDHB	1.20273	1.35593e-07
178	BAI1	5.84561	1.37365e-07
179	TUBB2A	1.61305	1.38383e-07
180	THYN1	1.08086	1.40559e-07
181	CTXN1	2.25705	1.40761e-07
182	C1orf61	6.54811	1.4598e-07
183	FDPSL2A	1.58902	1.46242e-07
184	KCNIP2	3.39748	1.49341e-07
185	CDCA7	1.95082	1.52658e-07
186	GPR155	2.99705	1.58424e-07
187	WSCD1	5.64975	1.58769e-07
188	MIR4485	1.13158	1.6101e-07
189	TUBB4A	1.24367	1.61108e-07
190	LOC100133985	2.43116	1.64484e-07
191	HILS1	3.29235	1.66624e-07
192	DNAH9	4.41249	1.73449e-07
193	NASP	1.2641	1.75783e-07
194	AHCY	1.35105	1.93069e-07
195	MACROD1	2.32282	1.99978e-07
196	C1QBP	1.42099	2.04586e-07
197	RRP9	1.40885	2.08684e-07
198	MAGEF1	0.988081	2.10495e-07
199	CECR5	1.46536	2.1168e-07
200	SLAIN1	4.35121	2.1565e-07
201	TIMM13	1.1709	2.17419e-07
202	MBTD1	1.49417	2.1828e-07
203	TCEB2	0.617751	2.20074e-07
204	VGF	6.23408	2.20121e-07
205	FAM95B1	5.91061	2.20199e-07
206	DHRS11	1.28725	2.24844e-07
207	ATP1A2	5.63777	2.33446e-07
208	FLJ22184	4.39768	2.44244e-07
209	FABP7	5.40934	2.45192e-07
210	C1orf106	3.1778	2.4617e-07
211	RRN3P1	2.86972	2.50941e-07
212	RBM14	1.09454	2.81192e-07
213	FAM181B	6.45722	2.85745e-07
214	SNORD38A	1.8654	2.96424e-07
215	TMEM97	1.7289	3.05573e-07
216	LPHN3	4.32	3.07235e-07
217	LOC100329109	1.79375	3.09256e-07
218	GINS2	1.71044	3.12703e-07
219	KDM2B	1.56869	3.19378e-07
220	LBR	1.74371	3.19399e-07
221	CHAF1A	0.673906	3.31604e-07
222	TRIL	3.47536	3.35386e-07
223	CDK5RAP1	1.13552	3.3899e-07
224	CTSL2	2.26398	3.45614e-07
225	OSR2	3.93847	3.55135e-07
226	CRISPLD1	5.42716	3.78857e-07
227	TOP1P2	0.977802	3.80968e-07
228	NCL	1.40449	3.86953e-07
229	RBM38	2.06305	3.91024e-07
230	CADM4	4.2972	3.93601e-07
231	MSH5-SAPCD1	2.22697	3.94043e-07
232	SAPCD1	2.22697	3.94043e-07
233	TOP1P1	0.952499	4.01407e-07
234	NTHL1	1.61304	4.05753e-07
235	ALDH5A1	2.38058	4.14461e-07
236	NBEAL2	2.03771	4.58081e-07
237	UNG	0.756978	4.92347e-07
238	DERL3	1.15939	5.07295e-07
239	TBX21	3.71438	5.17444e-07
240	LOC100506649	2.17065	5.46854e-07
241	SREBF2	1.1861	5.55299e-07
242	PDXP	1.08222	5.57684e-07
243	SHISA8	1.18357	5.61327e-07
244	SLC1A1	3.20993	5.67631e-07
245	ANP32A	1.18738	5.75888e-07
246	RPL8	1.06048	5.89401e-07
247	SF1	0.692199	5.92225e-07
248	TMEM229B	4.13902	5.94038e-07
249	RNF141	1.12992	6.0058e-07
250	MBNL3	3.19687	6.11565e-07
251	ST3GAL6	3.33129	6.22891e-07
252	SNRPA	1.55398	6.27662e-07
253	LRPPRC	1.59265	6.39456e-07
254	MCM2	1.27854	6.63659e-07
255	ELMOD1	2.39712	6.75703e-07
256	TMEM170B	3.05235	6.76975e-07
257	ZCCHC3	1.35505	7.06328e-07
258	SPTBN2	3.93481	7.07235e-07
259	MAPK4	3.20208	7.25022e-07
260	LINC00485	2.82338	7.43439e-07
261	PEG3	3.86882	7.50968e-07
262	POLDIP3	1.14878	7.57969e-07
263	PRIM1	1.50982	7.60168e-07
264	ISYNA1	3.03087	7.72866e-07
265	ELAVL1	1.65027	7.85337e-07
266	NUP93	1.42613	8.19412e-07
267	MTSS1	5.13378	8.21608e-07
268	DNAJC11	0.796472	8.28116e-07
269	SLITRK2	1.40773	8.3254e-07
270	RPL35	0.848182	8.44488e-07
271	PUF60	1.02512	8.7175e-07
272	CERS4	3.90349	9.04476e-07
273	LOC100507217	1.4302	9.19319e-07
274	TMEM206	1.551	9.2555e-07
275	SNRPG	0.934057	9.50656e-07
276	LOC100128593	1.51717	9.81536e-07
277	RCOR2	3.87564	1.00034e-06
278	SCLY	1.39508	1.01404e-06
279	SMARCA4	1.2344	1.03932e-06
280	E2F2	1.84549	1.04168e-06
281	TRA2B	1.16147	1.04725e-06
282	DNMT1	0.899949	1.09106e-06
283	SPNS1	0.895255	1.10015e-06
284	B3GAT1	4.18164	1.11993e-06
285	ACAP3	1.842	1.13411e-06
286	FOS	4.63489	1.13469e-06
287	RNF165	1.89944	1.15567e-06
288	EXOSC10	1.02321	1.17409e-06
289	INE1	1.59486	1.22017e-06
290	GINS1	1.64621	1.22044e-06
291	POLE3	1.10494	1.22983e-06
292	P2RX5	3.41697	1.24314e-06
293	NRARP	3.2527	1.25823e-06
294	C10orf95	2.2173	1.27065e-06
295	ADAM11	2.88607	1.30705e-06
296	RAB33A	3.47387	1.31683e-06
297	KIF21A	3.51102	1.35612e-06
298	SOX6	2.46419	1.44603e-06
299	HEATR2	0.962535	1.47246e-06
300	OTUB1	1.07074	1.54436e-06
301	FLOT2	1.48621	1.54473e-06
302	MLST8	1.15532	1.54797e-06
303	IGSF11	4.42086	1.57867e-06
304	PPIH	0.683897	1.58285e-06
305	GAB2	1.85544	1.60816e-06
306	ACOT7	0.953195	1.61374e-06
307	FAM19A5	5.06118	1.61646e-06
308	PPFIA3	1.69306	1.65968e-06
309	PLXNB3	1.89446	1.66738e-06
310	PCDH17	4.40548	1.6797e-06
311	AQP7P3	3.68931	1.68476e-06
312	C16orf13	1.01811	1.71876e-06
313	FUS	1.47897	1.77853e-06
314	ZNF321P	1.15315	1.79211e-06
315	ZNF816-ZNF321P	1.15315	1.79211e-06
316	LOC283174	3.58549	1.81678e-06
317	BUB1	1.07441	1.83761e-06
318	NIPSNAP1	1.18251	1.85068e-06
319	FAM108B1	1.18956	1.85703e-06
320	MAPK8IP3	1.14096	1.87989e-06
321	NAE1	0.671159	1.89151e-06
322	TRABD	1.02427	1.91046e-06
323	SLCO4A1	5.11236	1.92133e-06
324	DTYMK	1.13401	1.92837e-06
325	SLC6A11	2.60625	1.9578e-06
326	HMGB2	1.35151	1.96396e-06
327	CIRBP	0.79861	1.99062e-06
328	PRKCQ	1.92337	1.9986e-06
329	ZNF529	1.52875	2.00961e-06
330	TMIE	2.38465	2.02741e-06
331	PIPSL	1.75648	2.04046e-06
332	CLN6	1.13636	2.04643e-06
333	LOC727849	1.27859	2.05058e-06
334	GLT25D1	0.873672	2.10066e-06
335	PCSK2	3.18204	2.22844e-06
336	TROAP	1.51951	2.24082e-06
337	GSTZ1	1.17934	2.27457e-06
338	S1PR2	2.42266	2.29442e-06
339	GPHN	1.21395	2.34833e-06
340	UBE2S	0.705797	2.35783e-06
341	MCF2L	3.30784	2.39472e-06
342	FAM195A	1.54691	2.45783e-06
343	NR4A1	2.04015	2.46289e-06
344	RAMP2	3.75281	2.47892e-06
345	RIMS4	3.95677	2.50242e-06
346	XPO1	0.746667	2.52639e-06
347	F12	3.20977	2.59313e-06
348	GLT25D2	3.75324	2.61604e-06
349	MPST	1.54374	2.66583e-06
350	LIG1	1.06561	2.6681e-06
351	FAM173A	1.04057	2.68569e-06
352	HMGN2P46	1.547	2.68934e-06
353	SLC25A10	0.977793	2.69372e-06
354	LOC100130000	3.03343	2.70181e-06
355	BID	1.48173	2.71684e-06
356	SNORA11	1.93549	2.73566e-06
357	LHFPL3	4.22142	2.7887e-06
358	DHCR24	1.12669	2.82059e-06
359	RFC2	0.970401	2.83377e-06
360	PPP1R14C	4.81493	2.84094e-06
361	SEMA4D	1.7661	2.84287e-06
362	FAM134B	3.67153	2.85112e-06
363	ANP32AP1	1.37289	2.87599e-06
364	FAM86B1	1.68471	2.88312e-06
365	SHC2	1.88776	2.892e-06
366	LOC100128292	1.35409	2.93902e-06
367	SFMBT2	2.32828	2.97662e-06
368	RFXANK	1.47369	2.98466e-06
369	PA2G4	0.901543	3.02977e-06
370	SF3B1	0.742774	3.05431e-06
371	FAM64A	1.44022	3.05604e-06
372	WASH7P	0.744533	3.15671e-06
373	MTCH2	0.830352	3.16551e-06
374	CKMT1A	2.24523	3.18091e-06
375	OGDH	1.20824	3.19639e-06
376	MMAB	1.70695	3.23415e-06
377	ZC3H18	0.722968	3.27489e-06
378	KLF15	2.81725	3.32312e-06
379	DCXR	1.48033	3.36838e-06
380	CTNNBIP1	1.66202	3.42394e-06
381	ATG4B	1.36709	3.48688e-06
382	ANP32C	1.48027	3.54539e-06
383	ACO2	0.756877	3.58647e-06
384	GRIPAP1	1.51867	3.58798e-06
385	LOC152217	1.24477	3.60137e-06
386	MTFP1	1.54932	3.66315e-06
387	KIAA1274	4.43885	3.6837e-06
388	VWA1	3.38031	3.71334e-06
389	NOP58	1.44898	3.73878e-06
390	DCAF15	0.793507	3.80852e-06
391	FOXJ1	2.56426	3.95908e-06
392	MSH6	0.78184	3.97247e-06
393	ABHD3	1.54714	4.003e-06
394	MFF	1.27512	4.03537e-06
395	FNBP4	1.47905	4.04434e-06
396	GDAP1L1	3.5504	4.05974e-06
397	HNRNPA2B1	0.700998	4.06912e-06
398	OGDHL	3.59558	4.08455e-06
399	BCL7A	2.04746	4.10895e-06
400	SLC19A3	1.79586	4.11225e-06
401	OXCT2	1.77702	4.17507e-06
402	GLCCI1	2.48808	4.2088e-06
403	CDKN1B	1.3391	4.26099e-06
404	SLC43A2	2.66401	4.28907e-06
405	CCDC132	3.04253	4.29491e-06
406	HNRNPU	1.1729	4.31776e-06
407	ZNF704	2.68534	4.34102e-06
408	TH1L	0.916877	4.40436e-06
409	SSH1	2.64593	4.52071e-06
410	PLD6	2.71768	4.53526e-06
411	SNRPB2	1.38226	4.75719e-06
412	DDX12P	1.54055	4.76003e-06
413	RPL23AP64	0.788405	4.90569e-06
414	TSN	1.21929	4.92714e-06
415	PPT1	1.69795	4.9553e-06
416	KHSRP	0.941154	4.97402e-06
417	LOC147727	1.16721	4.9859e-06
418	FSD1	1.63165	5.00171e-06
419	RANBP1	1.62153	5.02752e-06
420	SCARB1	3.49335	5.05363e-06
421	HSPE1	1.2804	5.06479e-06
422	ATXN10	0.584483	5.1287e-06
423	PAFAH2	1.26137	5.16797e-06
424	SLC7A2	2.24279	5.18619e-06
425	CXorf36	2.88489	5.3168e-06
426	C3orf71	1.49734	5.35947e-06
427	CDC7	1.24184	5.39077e-06
428	HMHA1	1.52127	5.57199e-06
429	SPSB4	2.91559	5.58137e-06
430	UBE2C	1.19924	5.63131e-06
431	TIMELESS	1.15675	5.71676e-06
432	THOP1	0.90954	5.74338e-06
433	LOC729444	2.49919	5.77153e-06
434	LOC150381	0.966579	6.00578e-06
435	POLR2D	0.955907	6.0303e-06
436	MIIP	1.27188	6.06258e-06
437	BOLA2	1.165	6.105e-06
438	BOLA2B	1.16664	6.1405e-06
439	LOC100507537	1.40256	6.24863e-06
440	RPS2	1.17134	6.27314e-06
441	TOMM22	1.10469	6.3172e-06
442	ATAD3A	1.20776	6.39351e-06
443	GPR98	2.42952	6.43835e-06
444	WDR35	0.997801	6.51636e-06
445	C8orf33	1.06484	6.57858e-06
446	LOC100630918	2.44145	6.59659e-06
447	CKMT1B	1.92863	6.64888e-06
448	ATP5E	0.545031	6.65433e-06
449	LOC100288778	0.772445	6.68456e-06
450	KANK1	1.0511	6.68637e-06
451	ABAT	3.1272	6.8463e-06
452	RP1-177G6.2	2.3871	6.8887e-06
453	LOC731424	2.43011	6.90311e-06
454	TIMM8B	1.20989	6.90438e-06
455	PACSIN3	1.22293	6.93865e-06
456	ZDHHC22	4.38058	6.98744e-06
457	FEZ1	1.35248	7.11403e-06
458	TYMS	1.95854	7.12978e-06
459	TERT	2.04997	7.17025e-06
460	C16orf88	1.82422	7.37715e-06
461	CDK4	1.08519	7.46411e-06
462	MRPL40	0.758833	7.47857e-06
463	KDM1A	1.41343	7.49867e-06
464	SF3A1	0.660464	7.56342e-06
465	HTR3B	1.81689	7.57958e-06
466	NOVA1	3.40037	7.63483e-06
467	RAPGEF4	3.89563	7.63882e-06
468	CITED1	2.74333	7.66868e-06
469	MRPL12	1.02413	7.67319e-06
470	CA14	4.21089	7.74134e-06
471	SYT17	1.26247	7.79215e-06
472	LOC388152	1.34602	7.85387e-06
473	CDT1	1.2031	7.86776e-06
474	ENOSF1	1.98716	7.96349e-06
475	GYG2	3.11607	8.15273e-06
476	ILF3	0.920622	8.1788e-06
477	FKBP4	1.10156	8.18375e-06
478	DENND4B	1.28913	8.32279e-06
479	NDUFB11	0.783728	8.45242e-06
480	TRAPPC2L	0.960151	8.62906e-06
481	ORC1	2.29278	8.73624e-06
482	LOC643406	1.71586	8.81588e-06
483	MRPS9	0.753113	8.83424e-06
484	SNRNP200	0.682472	8.9353e-06
485	SHROOM4	2.3545	8.96858e-06
486	HMGN2	1.27422	9.09677e-06
487	BCHE	3.61419	9.1271e-06
488	SHPK	1.28649	9.14753e-06
489	LOC100505483	3.53269	9.22479e-06
490	SRRM2	0.922486	9.24363e-06
491	KIF15	1.66762	9.31037e-06
492	DDX11	1.37989	9.33912e-06
493	ETV4	2.67435	9.34921e-06
494	SH3BP1	1.42105	9.62331e-06
495	MANEAL	2.6347	9.63583e-06
496	AAAS	0.937696	9.72118e-06
497	NIT2	0.771258	9.76501e-06
498	ANKRD20A4	4.9773	9.85075e-06
499	CRTAM	1.83169	9.90908e-06
500	RCN2	0.826043	9.92559e-06
501	GGCT	1.20648	1.01842e-05
502	ZNF326	1.20077	1.02051e-05
503	LZIC	1.14171	1.02656e-05
504	TUBB8	1.23349	1.03759e-05
505	TONSL	1.58773	1.04465e-05
506	ELMO1	2.74168	1.06916e-05
507	MCRS1	0.550389	1.07009e-05
508	PGP	0.850039	1.07313e-05
509	CIAPIN1	0.811048	1.07781e-05
510	SNX10	3.88232	1.08977e-05
511	NKD1	1.76995	1.0931e-05
512	MIR573	2.50637	1.09646e-05
513	ANKRD20A1	4.97992	1.10711e-05
514	EPHB3	3.52204	1.1129e-05
515	CLDND2	2.06818	1.11716e-05
516	CHD7	3.89294	1.12262e-05
517	GTF3C5	1.06219	1.135e-05
518	MERTK	2.52895	1.15606e-05
519	MRPL4	0.82661	1.16656e-05
520	H2AFX	1.0646	1.17221e-05
521	MAPRE2	1.24174	1.17544e-05
522	C16orf80	1.21698	1.17703e-05
523	TRMT5	1.37292	1.18696e-05
524	PIF1	1.85233	1.19895e-05
525	DGKE	1.41347	1.20644e-05
526	PPP2R2B	3.68051	1.21423e-05
527	ABHD14A-ACY1	1.33538	1.21607e-05
528	ACY1	1.33538	1.21607e-05
529	MCF2L2	2.10149	1.23383e-05
530	DUS3L	1.58281	1.23666e-05
531	C7orf46	1.90468	1.23703e-05
532	AATK	2.21923	1.23704e-05
533	LOC100289092	1.70445	1.24064e-05
534	FAM100B	0.983402	1.24331e-05
535	WASH2P	0.760259	1.2511e-05
536	KIF1A	4.72006	1.25303e-05
537	ME2	1.66116	1.27213e-05
538	LSM4	0.67599	1.29813e-05
539	ECSIT	1.44301	1.315e-05
540	ANKRD20A2	4.94882	1.32481e-05
541	LOC100506469	0.865196	1.35735e-05
542	LOC642846	1.48133	1.36286e-05
543	GGA2	1.45722	1.36875e-05
544	LRG1	1.70692	1.36895e-05
545	PLA2G2D	1.65069	1.37098e-05
546	LOC100505854	0.747591	1.37973e-05
547	WASH3P	0.713088	1.387e-05
548	DAGLA	1.56656	1.39053e-05
549	PEG3-AS1	2.08145	1.40486e-05
550	AIFM1	1.06628	1.42973e-05
551	RCC2	1.23494	1.4313e-05
552	PSMA2	0.614562	1.43416e-05
553	GPR56	4.67043	1.43868e-05
554	RASL10B	3.17878	1.43934e-05
555	TOP1	1.09944	1.44799e-05
556	CCDC88C	2.12623	1.45809e-05
557	LRRTM2	3.0319	1.46424e-05
558	ANKRD20A3	4.93195	1.47517e-05
559	KAT2A	1.23275	1.47962e-05
560	AGTPBP1	1.03451	1.48007e-05
561	FXYD6	4.37477	1.51245e-05
562	C3orf70	2.73471	1.53062e-05
563	RP11-165H20.1	2.67572	1.53106e-05
564	TSEN2	1.62864	1.53777e-05
565	CLPP	0.672998	1.54485e-05
566	GADD45G	2.30915	1.54926e-05
567	LOC90499	3.645	1.59948e-05
568	RBM10	1.08025	1.60557e-05
569	RNF144A	3.00976	1.6143e-05
570	AGSK1	1.18292	1.62613e-05
571	EIF2B5	1.18455	1.62896e-05
572	SNHG1	1.00798	1.63653e-05
573	ANKRD20A8P	4.81993	1.6436e-05
574	PCBP4	1.03489	1.66192e-05
575	PAM16	1.27509	1.66413e-05
576	JUND	1.28857	1.68211e-05
577	RBM12	0.746627	1.69027e-05
578	GPATCH4	1.06007	1.72706e-05
579	ARRB2	1.31612	1.72724e-05
580	L2HGDH	1.61233	1.73238e-05
581	WDR12	1.58439	1.73393e-05
582	SORL1	3.12243	1.73431e-05
583	MDH2	0.930099	1.73935e-05
584	C12orf34	3.47683	1.75556e-05
585	CPSF6	1.56668	1.76006e-05
586	DCTPP1	1.03826	1.76306e-05
587	MCM5	1.24844	1.77064e-05
588	LOC100129480	1.44791	1.78617e-05
589	HRK	3.14288	1.79636e-05
590	TMEM121	2.16765	1.80292e-05
591	C11orf9	2.24166	1.80364e-05
592	MGAT4A	3.16316	1.81731e-05
593	EIF3B	0.760788	1.82326e-05
594	SOX12	1.14382	1.8356e-05
595	TRIB1	1.34165	1.86115e-05
596	CMTM8	2.37484	1.86902e-05
597	NUP160	0.770734	1.87122e-05
598	NUP107	0.745206	1.87468e-05
599	RPL23A	0.751887	1.88432e-05
600	C22orf32	0.988537	1.927e-05
601	RAN	0.61743	1.95694e-05
602	GSS	0.752444	1.97552e-05
603	ORC4	1.88138	1.97988e-05
604	GCDH	1.12878	1.98907e-05
605	CCDC78	1.82799	2.01552e-05
606	SNHG10	0.937924	2.04305e-05
607	SNRPF	1.14498	2.06275e-05
608	ETV5	1.96058	2.06592e-05
609	LOC400891	1.88519	2.06897e-05
610	H1FX	2.05009	2.07445e-05
611	CCL5	1.47023	2.07532e-05
612	FAM60A	2.40308	2.07725e-05
613	CYC1	1.22657	2.08712e-05
614	CKB	2.81341	2.10612e-05
615	C10orf58	1.96223	2.10888e-05
616	LOC283856	2.29089	2.12687e-05
617	PHB2	1.25755	2.1309e-05
618	S1PR5	2.06442	2.13187e-05
619	ZNF589	1.71515	2.14012e-05
620	NT5C	1.11916	2.14661e-05
621	RHPN1	3.25336	2.16406e-05
622	FLJ30679	1.76611	2.17035e-05
623	TIGD1	1.31284	2.17251e-05
624	PA2G4P4	1.08112	2.18635e-05
625	ZNF692	1.21515	2.21039e-05
626	C3orf39	1.43166	2.21441e-05
627	SLAMF6	1.61275	2.21559e-05
628	CCT6P1	1.25732	2.22815e-05
629	TM7SF2	2.73654	2.2468e-05
630	WHSC2	1.10951	2.24938e-05
631	SRSF7	1.07057	2.25933e-05
632	FAM5B	2.43237	2.28712e-05
633	UBQLN4	1.06699	2.32558e-05
634	RPA2	0.729156	2.36707e-05
635	UGT2B15	1.66942	2.37486e-05
636	RPL7	0.648917	2.42372e-05
637	SAP30	1.27215	2.42699e-05
638	CNIH2	1.67681	2.42836e-05
639	MDGA2	2.38609	2.42986e-05
640	SNHG6	0.944128	2.45294e-05
641	NME1	1.00044	2.52365e-05
642	TRMT1	1.29892	2.52873e-05
643	SMARCA5	0.644493	2.54132e-05
644	NCAPD2	1.14841	2.56015e-05
645	TLR10	1.35518	2.57321e-05
646	MARCKSL1	2.57224	2.59109e-05
647	LAMA1	3.41945	2.59387e-05
648	TBC1D15	1.69166	2.60937e-05
649	SMC2	0.721865	2.62444e-05
650	SPATA24	1.72095	2.62452e-05
651	MOG	2.58242	2.64517e-05
652	GSTP1	1.01263	2.65609e-05
653	PNPLA5	1.89423	2.66103e-05
654	DDX39A	1.14627	2.70879e-05
655	PCOLCE2	3.0715	2.71267e-05
656	NECAB2	3.2646	2.7176e-05
657	C14orf80	1.56938	2.72505e-05
658	ABCA3	3.23468	2.74595e-05
659	UBE2T	0.993616	2.78037e-05
660	P2RX7	3.12404	2.79377e-05
661	DBNDD1	2.2062	2.81559e-05
662	HNRNPD	1.0264	2.82887e-05
663	CHEK2	1.5804	2.83414e-05
664	DIS3L2	0.959254	2.85194e-05
665	CDC25C	1.34382	2.85555e-05
666	DIRAS1	2.10034	2.86399e-05
667	TOP2B	0.694222	2.87436e-05
668	CHTF18	1.36463	2.88649e-05
669	MRPS34	0.753396	2.90203e-05
670	CCT3	0.96591	2.93601e-05
671	TELO2	1.16321	2.94271e-05
672	RPL37A	0.929299	2.94272e-05
673	CPVL	4.4727	2.96838e-05
674	EMILIN3	2.81103	2.97126e-05
675	C2orf43	1.22646	2.9856e-05
676	HSD3BP4	2.6633	2.9874e-05
677	LOC285965	2.24572	3.01305e-05
678	RAB39A	1.45132	3.0163e-05
679	BOP1	1.43037	3.02992e-05
680	CAHM	2.12931	3.08084e-05
681	SPC25	1.1743	3.08862e-05
682	HIP1R	1.99456	3.09451e-05
683	DENND1A	1.76516	3.10357e-05
684	ENTPD3-AS1	1.30537	3.11223e-05
685	TRO	1.05164	3.11361e-05
686	ZNF559	1.2126	3.12285e-05
687	MLC1	4.8891	3.13454e-05
688	ARMC6	1.05654	3.15366e-05
689	MCM7	1.06936	3.16366e-05
690	LIFR	1.92284	3.16833e-05
691	C21orf62	1.82458	3.19868e-05
692	TOMM20	0.958981	3.30142e-05
693	DIP2B	1.31069	3.31186e-05
694	PHF16	1.41614	3.31529e-05
695	PTRHD1	0.999035	3.37498e-05
696	PSMG3	0.772047	3.39962e-05
697	IDH2	0.963852	3.46557e-05
698	ARHGAP31	1.41121	3.55126e-05
699	LOC648691	1.90851	3.57101e-05
700	TSEN34	0.624211	3.62026e-05
701	TIMM10	0.721648	3.64309e-05
702	PTPRJ	1.60153	3.65752e-05
703	ARHGAP33	1.03656	3.65775e-05
704	ZNF37BP	2.12578	3.67089e-05
705	MRPL13	0.857279	3.67505e-05
706	ABCA9	1.16864	3.6811e-05
707	TRUB2	0.949295	3.68231e-05
708	TMEM101	0.751132	3.73212e-05
709	PDLIM3	1.99036	3.7524e-05
710	RNPS1	0.816826	3.76488e-05
711	HMGCS1	2.42987	3.77828e-05
712	CLCN6	0.890198	3.7789e-05
713	MZT2B	0.683647	3.80548e-05
714	PFAS	1.41364	3.81235e-05
715	NOC4L	0.790706	3.84515e-05
716	NGFR	3.84711	3.84578e-05
717	LMNB1	1.5884	3.86271e-05
718	CORO7-PAM16	1.29606	3.86729e-05
719	TSR1	0.764931	3.88986e-05
720	TDRKH	2.28639	3.89404e-05
721	POLA2	0.554051	3.91525e-05
722	ITM2C	1.24281	3.92706e-05
723	NWD1	1.70431	3.95574e-05
724	TMEM198	2.8415	3.95629e-05
725	PMS1	1.11593	3.96645e-05
726	GNG2	2.67715	3.99132e-05
727	LPL	4.35081	4.00817e-05
728	COX5B	0.609386	4.02596e-05
729	UNC80	1.55384	4.05001e-05
730	TTC39C	2.33093	4.11283e-05
731	CSPG5	4.46889	4.12172e-05
732	TARBP1	1.23135	4.1667e-05
733	TMEM201	1.38984	4.17582e-05
734	ZNF768	0.684272	4.27157e-05
735	SLC25A11	0.980217	4.27332e-05
736	TMEM133	2.45781	4.27894e-05
737	TMEM88B	2.46869	4.29211e-05
738	ATXN2L	0.593288	4.29654e-05
739	C9orf66	1.17081	4.33864e-05
740	RPA3	1.28804	4.34974e-05
741	GTF3C1	0.718906	4.35353e-05
742	LDLRAD3	2.92762	4.38551e-05
743	RPL23AP32	0.992178	4.40783e-05
744	CELF2	3.0408	4.42721e-05
745	IMP4	1.06036	4.43563e-05
746	DHCR7	1.51053	4.44037e-05
747	FUT9	2.17378	4.5161e-05
748	SLMO2-ATP5E	0.533992	4.53946e-05
749	ZDHHC8P1	1.35787	4.5714e-05
750	HIST1H4J	1.49728	4.61422e-05
751	SLC6A10P	1.17822	4.64063e-05
752	CDC25A	1.69146	4.65625e-05
753	SEC14L5	1.63754	4.66901e-05
754	TSEN54	1.43899	4.68211e-05
755	RAD51	1.08247	4.79973e-05
756	ADA	2.28489	4.82513e-05
757	GFER	1.00638	4.83921e-05
758	PRR22	2.52235	4.88543e-05
759	ZNF607	1.05897	4.89054e-05
760	GCFC1	1.7777	4.91666e-05
761	FAM203A	1.29848	4.94362e-05
762	URB1	1.22975	4.99529e-05
763	C19orf79	0.579786	5.00353e-05
764	GNPDA1	1.1888	5.06149e-05
765	POLR2A	0.590674	5.09529e-05
766	YTHDF2	0.714153	5.13204e-05
767	LOC100129716	1.59083	5.13705e-05
768	G6PC3	1.07277	5.16903e-05
769	PCYOX1L	1.34901	5.20506e-05
770	PTBP1	0.550586	5.21672e-05
771	LOC645676	2.06993	5.23512e-05
772	PPAN	1.08807	5.23838e-05
773	PES1	1.39704	5.24663e-05
774	RBX1	0.516417	5.2615e-05
775	TMEM213	2.05999	5.26818e-05
776	CCDC167	0.961953	5.29079e-05
777	TOE1	0.8153	5.30133e-05
778	ACTN2	2.61875	5.31058e-05
779	RTKN	1.81281	5.35244e-05
780	SKP2	1.36521	5.45486e-05
781	SLC6A8	1.354	5.47182e-05
782	CKM	1.80823	5.47197e-05
783	SPAG5	1.26505	5.4743e-05
784	DPY19L3	1.13511	5.47917e-05
785	LSM5	0.755006	5.53908e-05
786	GDAP1	1.69814	5.54168e-05
787	CHCHD8	0.702864	5.55102e-05
788	HIST2H2BC	2.20248	5.56778e-05
789	DTWD2	1.9137	5.58741e-05
790	ZNF669	1.4438	5.61306e-05
791	RRP1	1.07151	5.6495e-05
792	C18orf56	2.16046	5.65125e-05
793	CELSR3	2.10848	5.6712e-05
794	KIAA0101	1.15425	5.68936e-05
795	CCDC72	0.866622	5.72717e-05
796	SSB	0.803764	5.7597e-05
797	VASH1	1.44501	5.79644e-05
798	LHFPL4	3.30553	5.80806e-05
799	FBXL16	1.68099	5.8111e-05
800	ANP32B	0.833041	5.82287e-05
801	SLC43A1	1.21031	5.89375e-05
802	EIF3H	0.577387	5.9302e-05
803	SPNS2	0.90203	5.9504e-05
804	SLC27A1	1.21556	5.99712e-05
805	FLJ41200	2.2351	6.02e-05
806	RSL1D1	1.46149	6.08608e-05
807	NME1-NME2	0.576437	6.09188e-05
808	SLC19A1	1.65665	6.09712e-05
809	TSPAN13	2.06097	6.12019e-05
810	ARHGEF9	1.45881	6.12544e-05
811	HMGB3P1	1.50621	6.14839e-05
812	NDUFS5	0.67682	6.18039e-05
813	DNMBP-AS1	1.74207	6.21498e-05
814	WDR31	1.11626	6.23179e-05
815	DPF1	2.32595	6.2884e-05
816	KANSL1-AS1	1.33058	6.33678e-05
817	SLC1A3	3.03556	6.36429e-05
818	TMEM183A	0.852911	6.36955e-05
819	C19orf76	2.17155	6.43608e-05
820	SUV39H1	0.905414	6.46087e-05
821	FAM83A	1.78051	6.48766e-05
822	OIP5	1.03462	6.5654e-05
823	MRPS26	1.39543	6.58375e-05
824	LOC400958	2.25719	6.58482e-05
825	MAP6D1	2.48938	6.63684e-05
826	GPR112	2.43009	6.64289e-05
827	PCDH7	2.4251	6.68927e-05
828	RBM47	2.03896	6.73442e-05
829	MTRNR2L8	0.786803	6.79183e-05
830	OLA1	0.799623	6.7942e-05
831	IGDCC3	1.74691	6.81877e-05
832	RCC1	1.1103	6.86357e-05
833	TOMM40	1.49317	6.86698e-05
834	PFDN2	0.683147	6.87816e-05
835	SARS2	1.52544	6.92845e-05
836	RPS2P32	1.29084	6.95694e-05
837	CD96	1.84991	7.04606e-05
838	ARGFX	1.6205	7.05425e-05
839	CCDC106	1.05322	7.07379e-05
840	PRTFDC1	1.34598	7.1252e-05
841	FBXL6	0.987085	7.13085e-05
842	CCDC144B	1.57786	7.19732e-05
843	NPAS3	2.44924	7.27012e-05
844	CXorf48	1.79547	7.30278e-05
845	HJURP	0.877055	7.32563e-05
846	ATP6V0C	0.551635	7.34589e-05
847	RBMXL1	1.51003	7.38101e-05
848	KIAA0195	0.967672	7.4411e-05
849	SCRIB	1.43946	7.4582e-05
850	MTRNR2L7	1.39184	7.46339e-05
851	FKBP5	1.97799	7.70118e-05
852	NOL3	0.791668	7.72034e-05
853	CADM2	1.95097	7.72918e-05
854	VN1R2	1.26263	7.73435e-05
855	DUS2L	0.561849	7.73726e-05
856	ELAC2	0.654426	7.81914e-05
857	WWC1	2.08248	7.94985e-05
858	SEMA6A	3.37538	7.98754e-05
859	PAG1	1.49828	8.01271e-05
860	RPAP1	0.699569	8.07849e-05
861	GPR82	1.59476	8.0949e-05
862	LOC100505738	1.21841	8.0972e-05
863	PAICS	0.83017	8.11928e-05
864	LPAL2	1.72555	8.12961e-05
865	CNOT10	0.694827	8.13131e-05
866	ICA1	3.11566	8.21468e-05
867	LUC7L	0.936466	8.31034e-05
868	NFATC3	1.15318	8.3121e-05
869	FHIT	2.42358	8.32441e-05
870	MRPS7	1.09834	8.39318e-05
871	TARDBP	0.633569	8.40893e-05
872	DDX56	1.05118	8.43402e-05
873	MSH2	1.33245	8.44321e-05
874	ZNF431	1.60466	8.45696e-05
875	KATNB1	1.07939	8.51876e-05
876	SMARCB1	1.16146	8.52195e-05
877	LMOD3	2.29719	8.68441e-05
878	SLC25A23	0.937636	8.68613e-05
879	RAC3	2.32835	8.71647e-05
880	NKTR	0.930521	8.72655e-05
881	RHOT2	0.730266	8.72843e-05
882	WSB1	0.91036	8.78858e-05
883	MDFI	3.79859	8.81221e-05
884	CDC20	0.953665	8.82771e-05
885	OR7C1	1.78252	8.83134e-05
886	DCP2	1.00207	8.85801e-05
887	CPSF3L	0.616244	8.91823e-05
888	RTN4RL1	3.21046	8.92132e-05
889	FAM136A	0.607841	8.93887e-05
890	ITPKA	1.58731	8.9713e-05
891	ATIC	0.808314	9.04518e-05
892	SOX2-OT	2.25612	9.06909e-05
893	DSCAM-AS1	2.72164	9.08899e-05
894	CNTRL	1.20239	9.16753e-05
895	MKI67	0.998606	9.2433e-05
896	FAM110B	1.11112	9.25329e-05
897	ZNF665	1.28146	9.27661e-05
898	DKFZP434L187	1.63275	9.36195e-05
899	SYP	3.0613	9.40217e-05
900	ILKAP	1.00714	9.41653e-05
901	DNASE1	1.54328	9.47652e-05
902	OR11A1	1.89601	9.48339e-05
903	ANKRD20A5P	3.72712	9.50654e-05
904	TMC6	3.03209	9.62131e-05
905	CLASRP	1.18229	9.66779e-05
906	MAPK12	1.14297	9.74727e-05
907	FAM105A	1.5187	9.7866e-05
908	TTLL4	1.69097	9.82205e-05
909	ARL11	1.86158	9.88925e-05
910	CLDN19	1.25759	9.93714e-05
911	POP1	1.05582	0.000100024
912	DHFR	0.686261	0.000100546
913	CCT6A	1.21619	0.000101365
914	KCMF1	1.49039	0.000101573
915	SPATA6	1.96552	0.000101875
916	STIP1	0.858036	0.000101879
917	SNORD86	1.76118	0.000102085
918	HCG9	2.16797	0.000102157
919	ENO1-AS1	1.36684	0.00010235
920	SSRP1	0.683206	0.000102519
921	MIS18A	1.142	0.000103792
922	GABRA2	2.41681	0.000103934
923	COX8A	1.03312	0.00010409
924	SF3B14	0.823666	0.00010516
925	CD83	1.88451	0.000105248
926	CHKB	0.766544	0.000106266
927	C8orf86	1.67084	0.000106297
928	DPP6	2.3019	0.000106728
929	CCT2	0.622531	0.000107309
930	CSGALNACT1	2.70633	0.000107941
931	ATP5I	0.518607	0.000107975
932	SQLE	2.51914	0.000109115
933	EVL	0.664501	0.000109348
934	ALPP	1.68268	0.00010968
935	CLUL1	2.07647	0.000110606
936	BGLAP	1.02287	0.000110989
937	GLMN	0.893804	0.000111344
938	LOC100129269	1.55098	0.00011139
939	PAQR4	0.712581	0.00011182
940	ABCB6	1.45934	0.000112993
941	CEMP1	1.43737	0.000113678
942	SESN3	1.53905	0.000113722
943	COQ9	0.723559	0.000115535
944	ERI2	0.740092	0.000115613
945	DDX28	1.61677	0.000115889
946	FBXW7	1.08979	0.000116227
947	DHX15	0.765937	0.000116397
948	ST13	0.795155	0.000117017
949	PATE2	1.94278	0.000117149
950	CSK	0.897136	0.000117202
951	GARNL3	1.7332	0.000117683
952	CHCHD4	0.993415	0.000118235
953	TIMP4	3.47596	0.000119661
954	HCFC1	0.953067	0.000119933
955	GNRHR2	0.685151	0.000119989
956	SMARCC1	1.19521	0.00012044
957	NUF2	0.85297	0.000120573
958	PDE4C	1.66671	0.000120689
959	CPSF1	1.19157	0.00012098
960	LOC100132724	1.31833	0.000121936
961	CLNS1A	0.636013	0.000122474
962	ACSL3	1.16756	0.000122692
963	ACSL6	1.91343	0.000122814
964	EXO1	0.71562	0.000124318
965	PLCG1	0.9443	0.000124596
966	ARNT2	1.04162	0.0001248
967	SCD5	1.35888	0.000125755
968	ZNF428	1.43577	0.000127048
969	ACSBG1	2.98087	0.000128081
970	CACHD1	1.36728	0.000129071
971	VRK1	1.32992	0.000129112
972	PRMT1	0.785682	0.000129881
973	NKAIN4	3.74305	0.000130798
974	LOC441242	1.69801	0.000131146
975	C8orf85	1.74047	0.000132607
976	LOC100134229	1.93437	0.000133478
977	FBRSL1	1.16985	0.000133889
978	QPRT	3.67633	0.000133931
979	WASH1	0.702154	0.000134422
980	ADSL	1.15602	0.000134524
981	FLJ37453	1.0859	0.00013535
982	LOC100131496	1.18001	0.000135481
983	MYBBP1A	1.0817	0.000137802
984	ASIC4	3.13736	0.000138082
985	B4GALNT3	3.1228	0.000138088
986	NINJ2	3.1228	0.000138088
987	YJEFN3	0.963558	0.000138604
988	DBF4	1.06028	0.000138711
989	KIF22	1.00819	0.000138753
990	RAD21-AS1	1.87842	0.000139111
991	SLC7A14	1.74324	0.000139303
992	FCHO1	2.83344	0.000140186
993	LILRA5	1.54204	0.000141117
994	CENPV	3.71724	0.000142158
995	C20orf201	2.65589	0.000142364
996	DGKB	1.63813	0.00014296
997	GATS	1.43494	0.000143027
998	UQCRHL	0.750209	0.000143828
999	PACSIN2	0.999111	0.000143862
1000	TMEM48	1.39729	0.000146245
1001	PSMD4	1.46591	0.000146546
1002	ECI1	1.34735	0.000146829
1003	TOX3	3.47965	0.000146845
1004	CD320	1.17631	0.000146957
1005	HRSP12	1.48006	0.000147395
1006	COPS7B	0.635569	0.000147576
1007	KIAA1524	1.29638	0.000148639
1008	HAUS1	1.30775	0.000150306
1009	GSG1	1.43339	0.000150329
1010	PRR7	1.28245	0.000152839
1011	FDFT1	1.92457	0.000153161
1012	SCAND1	1.57335	0.00015363
1013	TOMM70A	0.770069	0.000153838
1014	NR4A2	2.93224	0.000154792
1015	CGNL1	1.33782	0.000155031
1016	MIRLET7D	1.42943	0.000155149
1017	NRGN	1.86337	0.000155172
1018	CSTF3	1.02866	0.000156243
1019	CEACAM5	1.99317	0.000157106
1020	AKAP7	1.75107	0.000158561
1021	TNFRSF19	3.19745	0.000158614
1022	KNTC1	0.998792	0.000158766
1023	CNP	0.77983	0.000158957
1024	CHCHD2	1.02905	0.000159449
1025	AGBL5	1.2215	0.000161117
1026	RECQL4	1.53922	0.000162234
1027	C1orf31	0.730316	0.000162266
1028	TNFSF15	1.17884	0.000162342
1029	FAM153C	1.37235	0.000163159
1030	POLR1A	1.33622	0.000165015
1031	FLJ32063	1.90769	0.000165533
1032	LOC340037	2.43419	0.000165804
1033	DNAJC28	1.7566	0.000165812
1034	ATP5B	0.787792	0.000166089
1035	C16orf54	1.03442	0.000166198
1036	CD200	2.53656	0.000167357
1037	MTRNR2L6	1.25978	0.000167601
1038	HNRNPA1L2	1.17127	0.000168125
1039	C12orf45	1.1702	0.000168388
1040	NOB1	0.552092	0.000169097
1041	NUDC	0.850766	0.000172408
1042	CMTM5	4.30216	0.000173148
1043	MTRNR2L2	0.755978	0.000173229
1044	HAGHL	1.40905	0.000176098
1045	RRP7B	1.29403	0.000176771
1046	CCDC28B	1.64646	0.000177552
1047	HSH2D	1.47891	0.00017826
1048	CECR6	2.76874	0.000178326
1049	NLGN4X	4.03994	0.00017918
1050	FBLL1	2.93479	0.000180443
1051	MUTYH	1.29846	0.000180541
1052	EIF4G3	1.62584	0.000180694
1053	QRFPR	1.67117	0.000181521
1054	STARD7	0.694373	0.000182216
1055	LOC643623	1.40247	0.000182806
1056	ADH4	1.53003	0.000184725
1057	MCTS1	1.25672	0.000184908
1058	PIM3	1.29926	0.00018847
1059	ATP5G3	0.802079	0.000188565
1060	LOC145820	1.84654	0.000188756
1061	CEP95	0.95545	0.00018985
1062	RPL17	0.892388	0.000189861
1063	GAD1	3.59495	0.00019036
1064	CSNK2A1	0.685662	0.000191175
1065	SEC14L4	1.66338	0.000192247
1066	TAS2R20	0.744168	0.000193098
1067	TRIB2	1.67594	0.000193947
1068	SRR	0.635047	0.000195756
1069	HLA-F-AS1	0.61531	0.000197365
1070	LSR	1.14097	0.000197476
1071	OPA1	0.799823	0.000197829
1072	CPSF3	1.10348	0.000198647
1073	PHF19	1.24251	0.000199163
1074	PRDX2	1.7559	0.0001995
1075	KIAA1614	1.36076	0.000200128
1076	RAB4B	1.25177	0.00020102
1077	SRM	0.800453	0.000201607
1078	DUT	0.70171	0.000202079
1079	SLC25A29	1.37609	0.0002028
1080	HYLS1	1.95077	0.000202809
1081	RSBN1L	1.34251	0.000203567
1082	IP6K2	0.532463	0.000203588
1083	PVT1	3.5062	0.000205228
1084	LIG3	1.44052	0.000206724
1085	DMAP1	0.964919	0.000207266
1086	AKAP8L	1.83537	0.000210097
1087	GJD4	1.71763	0.000212069
1088	GET4	1.04078	0.000212445
1089	KCNJ11	1.2336	0.000212482
1090	CCDC34	1.01946	0.000213967
1091	PRORSD1P	1.14882	0.000214258
1092	TTTY15	1.91828	0.000215067
1093	TMEM183B	0.801793	0.000216771
1094	NCAPH	1.11395	0.000218086
1095	B4GALT3	1.23561	0.000218757
1096	RFX4	2.39649	0.00021909
1097	BRD7	0.653724	0.000219243
1098	ARHGAP19	1.1454	0.000219989
1099	DSG3	2.18537	0.000221054
1100	MIR4647	1.17432	0.000221293
1101	DTL	0.786855	0.000223812
1102	TSPAN14	1.65625	0.000226482
1103	LOC100129917	1.40861	0.000226742
1104	LINC00550	1.87392	0.000227175
1105	KARS	0.60771	0.000229363
1106	ZNF462	1.17892	0.000229602
1107	BRI3BP	1.74685	0.000229688
1108	NR2C2AP	0.741285	0.000230237
1109	C16orf87	0.935101	0.000230847
1110	HNRNPL	0.879804	0.000230899
1111	EXOSC4	1.07581	0.000230982
1112	CCDC120	1.4216	0.000231798
1113	LHX2	2.69985	0.000232682
1114	GPD2	1.6454	0.000233179
1115	KIAA0664	0.652204	0.00023337
1116	C8ORFK29	1.1851	0.000233861
1117	DDX55	1.2114	0.000235118
1118	LAIR1	1.67593	0.000235782
1119	JMJD7-PLA2G4B	1.4336	0.000237294
1120	PLA2G4B	1.4336	0.000237294
1121	TIPIN	1.0433	0.000238882
1122	YRDC	0.976537	0.000239003
1123	TAF6L	1.1889	0.000240347
1124	FANCA	1.80858	0.000240654
1125	ITIH5	1.26113	0.000240856
1126	MAPK8IP2	3.03114	0.000241469
1127	CBX2	1.40294	0.000241785
1128	C6orf132	1.92024	0.000242651
1129	RPL14	0.741383	0.000245438
1130	KCNE3	1.78634	0.000246328
1131	PSMD3	0.898581	0.000246554
1132	SURF2	0.991314	0.0002469
1133	NMUR1	0.91685	0.000248282
1134	FAM133B	1.04852	0.000248304
1135	KIAA1958	2.21358	0.000248947
1136	MGC21881	1.80034	0.000249502
1137	IQCJ-SCHIP1	1.70529	0.000250711
1138	SCHIP1	1.70529	0.000250711
1139	GALNT6	1.41178	0.000251087
1140	DNAJC19	0.577982	0.000251507
1141	ZNF121	1.67437	0.000251889
1142	LRRC27	1.8928	0.000251954
1143	HNRNPA1	1.15699	0.000252873
1144	ZNF90	2.10846	0.000252976
1145	CPLX1	3.9992	0.000254737
1146	KIAA1751	1.31749	0.000255624
1147	MAD2L1	1.1846	0.000257301
1148	U2AF1	0.833976	0.000257366
1149	C1orf233	2.0817	0.000258044
1150	LOC338817	2.10422	0.000259001
1151	FEM1C	1.30611	0.000260354
1152	FLJ43860	2.95127	0.000262007
1153	FBXL19	1.01918	0.000262204
1154	C1orf21	2.26075	0.000263347
1155	CDC6	0.997697	0.000263782
1156	SCAP	0.901729	0.000264195
1157	LOC100190986	1.40903	0.000264653
1158	PMF1	0.996063	0.000266652
1159	AASDHPPT	0.954054	0.000266889
1160	MEX3A	2.12259	0.00026727
1161	EIF3E	0.554679	0.000267295
1162	MNS1	1.59746	0.000267541
1163	TMEM160	1.69029	0.000268251
1164	SPIRE2	1.76388	0.000268489
1165	SEMA4C	1.1302	0.00026891
1166	SNRPD2	0.748088	0.000269387
1167	ACTR5	0.77984	0.000269861
1168	XRCC6	0.526317	0.000269972
1169	HOXA3	1.33254	0.000271256
1170	H1FX-AS1	2.11436	0.000271969
1171	GATC	0.85193	0.000272598
1172	C19orf26	1.5129	0.00027301
1173	MVD	1.39829	0.00027427
1174	TYMP	2.27822	0.000274281
1175	CABP4	2.50705	0.000274905
1176	CCDC88A	0.773345	0.00027642
1177	HNRNPA1P10	1.16809	0.000277638
1178	C19orf54	0.779337	0.000278433
1179	MIR9-1	3.03424	0.000278739
1180	HSPC072	1.22594	0.000279687
1181	HNRNPM	0.858762	0.00027987
1182	CEP78	1.38597	0.000280228
1183	DHX30	0.885554	0.000281596
1184	RPL17-C18ORF32	0.75069	0.000283424
1185	NPIPL3	1.10057	0.000283846
1186	RNASEH2A	0.699677	0.000284195
1187	CYP8B1	1.38176	0.000284942
1188	MRPS18A	0.875212	0.00028567
1189	SCAI	1.29019	0.00028601
1190	SNAPC4	0.96586	0.000286774
1191	LOC728066	1.06353	0.000287919
1192	SGK494	2.03118	0.000288168
1193	MNX1	2.6156	0.000288434
1194	FAT3	1.77316	0.000289989
1195	AZGP1	4.28117	0.000290511
1196	ANKRD39	1.35926	0.000290919
1197	OBSL1	0.966123	0.000291747
1198	ZNF433	1.16753	0.00029311
1199	PTTG1	0.759606	0.000293433
1200	SYNPO2L	1.89438	0.000295895
1201	ERVK13-1	0.888532	0.000298997
1202	FANCI	1.40542	0.000301494
1203	NIF3L1	0.717083	0.000301533
1204	MS4A7	1.98804	0.000302273
1205	BCL2L11	1.98192	0.000302731
1206	INSM1	4.434	0.000303179
1207	U2AF2	0.608827	0.000303674
1208	H3F3A	0.801549	0.000307357
1209	H3F3AP4	0.801549	0.000307357
1210	GPR37L1	1.67314	0.000309128
1211	SS18L2	0.994841	0.000309468
1212	ACSS2	0.607606	0.000311065
1213	TADA1	0.995162	0.000311199
1214	APC2	1.53493	0.000313324
1215	LOC401321	1.77102	0.0003136
1216	SERBP1	1.16468	0.000313816
1217	PCDHGA9	1.79108	0.000314314
1218	COX5A	0.621921	0.000314716
1219	PSMB7	0.613454	0.000314768
1220	TEX10	0.853752	0.000317193
1221	DNTTIP2	0.78307	0.000317759
1222	EXOSC6	0.721336	0.000318522
1223	IGSF3	3.44382	0.000322005
1224	HNRNPR	0.624843	0.000322059
1225	C2CD4A	1.8607	0.000323676
1226	D2HGDH	1.10228	0.00032417
1227	ACP1	0.733941	0.000325081
1228	C22orf39	0.864836	0.000325367
1229	TSHZ2	1.6908	0.000325677
1230	MTRNR2L4	0.918224	0.000326764
1231	LOC90784	0.908923	0.000327973
1232	TEDDM1	1.42539	0.000328192
1233	UCP2	2.8441	0.000328388
1234	SUV420H2	1.07472	0.000330618
1235	SIRPB2	1.217	0.000331401
1236	MAZ	0.723747	0.000331718
1237	CNNM2	1.42861	0.00033304
1238	TIMM50	0.597657	0.000334901
1239	MCTP2	1.66786	0.00033505
1240	TIMM44	0.904077	0.000335437
1241	SLC5A12	2.49531	0.000336048
1242	POLR2E	0.56608	0.000336754
1243	CHCHD6	0.916326	0.00033702
1244	LOC100130899	2.05778	0.000337154
1245	HERC5	2.6779	0.000337963
1246	PABPC1L	1.26648	0.000338126
1247	LOC100129387	1.08591	0.000338471
1248	DDX51	1.17427	0.000338754
1249	HUS1B	1.50354	0.000339039
1250	TP53AIP1	1.93794	0.000339824
1251	NOS1	1.42587	0.000340054
1252	FAM72B	1.41082	0.000340821
1253	SNHG9	1.3645	0.000341074
1254	ATAD3B	0.905916	0.000342333
1255	NT5M	2.06082	0.000343929
1256	TTPA	1.89231	0.000345863
1257	LOC100132247	1.12733	0.000347202
1258	C16orf5	1.9129	0.000347434
1259	C1orf159	1.08613	0.000347724
1260	PANK1	2.02728	0.000348575
1261	PDE6A	1.34014	0.000349498
1262	OR6W1P	1.2443	0.000349691
1263	SPTLC3	1.27342	0.000350722
1264	SNORA10	1.45248	0.000351143
1265	SLC2A13	1.91782	0.000354034
1266	SLC47A1	3.14919	0.000354969
1267	SCIN	1.58128	0.000355795
1268	CACNG4	4.0139	0.000356827
1269	COL9A1	3.91013	0.000358509
1270	MARK1	1.82008	0.000358805
1271	SLC5A6	1.31645	0.000361398
1272	MRPL37	0.804332	0.000361705
1273	TMEM51	0.907854	0.000362324
1274	RPL7A	0.544225	0.000365009
1275	FAM72D	1.45429	0.000365698
1276	MTRNR2L10	1.23236	0.000366387
1277	POP5	0.681105	0.000366707
1278	GNL3	0.881296	0.000367766
1279	DEPDC1B	1.52156	0.000367902
1280	BSN-AS2	1.85337	0.000368629
1281	PSMB4	0.892963	0.000369076
1282	ANO6	1.6444	0.000369667
1283	CCDC69	1.25379	0.000372278
1284	C17orf89	0.885942	0.00037384
1285	BLM	0.923345	0.000374047
1286	ZNF850	1.65092	0.000375567
1287	TTC9B	2.66046	0.000375977
1288	HOMER1	2.17894	0.000377026
1289	TDG	1.10575	0.000377587
1290	CHST11	1.79031	0.000378422
1291	ITIH6	3.20463	0.000378906
1292	KHDRBS1	0.632461	0.000382773
1293	C19orf48	0.696271	0.000384036
1294	ALYREF	1.45788	0.000384347
1295	MRPL51	0.566312	0.000384799
1296	AEN	0.875562	0.000385039
1297	MCAT	0.571003	0.000385357
1298	RALY	0.571307	0.000385395
1299	ITPK1	1.78576	0.000385707
1300	SF3B3	0.970066	0.000388397
1301	MIDN	0.670327	0.000390633
1302	DPH2	0.893497	0.000392191
1303	ZNF527	1.49696	0.000395985
1304	FAM92A3	0.873921	0.000396984
1305	PPP2R1A	0.657383	0.000399392
1306	FAM217B	1.22438	0.000400434
1307	AKR1D1	1.5827	0.000400891
1308	LOC389791	1.10248	0.000401012
1309	RAD51AP1	1.02326	0.000403076
1310	DGUOK	0.538331	0.000407492
1311	LOC80054	1.5746	0.000409579
1312	PDIA2	1.03023	0.000410071
1313	ASB11	2.09813	0.000411722
1314	PCDHB19P	1.61701	0.000412038
1315	HNRNPC	0.796665	0.000413165
1316	STAC2	2.57488	0.000414067
1317	AASS	1.12758	0.000416509
1318	ZMYND8	0.925818	0.000417399
1319	MCCC1	1.18498	0.000418427
1320	EPB41	1.27307	0.000420275
1321	MRPL38	0.893976	0.000421101
1322	LSM3	0.665623	0.000422706
1323	ASRGL1	2.53429	0.000422908
1324	LONP1	0.706667	0.000431278
1325	TNFRSF13C	2.04549	0.000432491
1326	CCT8	0.538774	0.000434115
1327	HDHD2	1.22927	0.000434533
1328	CAPN10	1.01105	0.000435129
1329	MCOLN2	2.07631	0.000441884
1330	FAM72A	1.28447	0.000444047
1331	CENPM	0.845688	0.000445542
1332	ACADM	1.1332	0.000446908
1333	CHRM1	2.54933	0.0004489
1334	SRBD1	1.14706	0.000451926
1335	NPPC	2.36959	0.000454912
1336	ABCB5	1.90368	0.000455891
1337	CAMKK2	1.45273	0.000457136
1338	PTPRD	1.78658	0.000457668
1339	SLC4A11	2.05628	0.000460047
1340	HS6ST2	4.00616	0.000461291
1341	NDUFAF3	1.27723	0.000462925
1342	ATP5A1	0.712864	0.000463929
1343	DNTTIP1	0.547025	0.000464783
1344	C17orf77	1.36421	0.000467474
1345	DYNC1LI1	1.20216	0.000468036
1346	SEC61A2	1.94133	0.000468846
1347	TRA2A	0.791707	0.000471791
1348	MRPL30	0.842449	0.000473679
1349	SHE	1.63985	0.000474512
1350	HIST2H2AB	1.3162	0.000475456
1351	MAN1C1	2.94465	0.000477707
1352	ZNF444	0.542452	0.000478281
1353	TMTC2	1.98279	0.00047869
1354	PCA3	1.95883	0.000479132
1355	DDX54	0.774361	0.000482186
1356	FLRT1	1.89636	0.00048369
1357	GINS3	1.00317	0.000484752
1358	LINC00314	1.56561	0.000485548
1359	LINC00273	2.24309	0.000485806
1360	ZNF710	1.08459	0.000485953
1361	CCDC58	0.847871	0.000488162
1362	SPC24	0.842524	0.00048877
1363	KLHL23	2.20982	0.000489994
1364	PHOSPHO2-KLHL23	2.20982	0.000489994
1365	ZNF57	1.31753	0.000494408
1366	LOC100131564	2.05766	0.000494932
1367	NUBP2	0.614686	0.000496851
1368	DCAF13	1.33511	0.000497241
1369	LOC100507032	1.75032	0.000498391
1370	LOC613037	1.26813	0.000499567
1371	MKI67IP	0.9484	0.00050695
1372	UBAP2L	1.18097	0.000507573
1373	EXOSC8	0.835162	0.000512131
1374	ANKRD20A9P	0.690204	0.00051421
1375	SEC1	1.70889	0.000514525
1376	LOC285954	1.63663	0.000521775
1377	NFAM1	1.61093	0.000522346
1378	POLD1	1.19755	0.000523174
1379	OTUD6A	1.58108	0.000526914
1380	AIPL1	2.04831	0.000528451
1381	CEP85L	1.71668	0.000529052
1382	DNAH11	1.73121	0.000533553
1383	PDE7A	1.04362	0.000534062
1384	ALKBH2	1.0126	0.000534726
1385	PAR-SN	1.67721	0.000535959
1386	LAMA4	3.05775	0.000539316
1387	SRSF10	0.614505	0.000542029
1388	LOC643387	0.588215	0.00054341
1389	DNMT3B	1.44673	0.000543589
1390	CAMK2B	1.17456	0.000543989
1391	SALL2	2.16369	0.000547178
1392	HNRNPH1	0.634026	0.000550604
1393	C8orf44-SGK3	2.01322	0.000551486
1394	SGK3	2.01322	0.000551486
1395	REV3L	1.47901	0.000552267
1396	NPW	3.90813	0.000553147
1397	WDR18	0.874025	0.000555807
1398	POM121L8P	1.81427	0.000558229
1399	QPCTL	1.43098	0.000559644
1400	LOC100294362	1.16998	0.000561688
1401	HPS4	0.672208	0.000562655
1402	POP7	0.544393	0.000564154
1403	ARC	3.15445	0.000564813
1404	C19orf60	0.764635	0.000566391
1405	MRPL23	1.2765	0.000569192
1406	RAE1	0.701065	0.000570464
1407	MLLT4-AS1	1.81126	0.000571455
1408	OTUD3	1.42508	0.000574447
1409	SFMBT1	1.06353	0.000575915
1410	KLF4	1.13044	0.000580927
1411	NT5DC2	0.843498	0.000582358
1412	FAM74A2	1.51692	0.00058238
1413	FAM74A4	1.51692	0.00058238
1414	DPH5	1.03225	0.000585345
1415	DHPS	0.566726	0.000587163
1416	SLC29A2	2.44018	0.000588163
1417	CNTN1	1.44328	0.000588842
1418	LEP	0.935308	0.00059171
1419	RPS8	0.621167	0.000593236
1420	FAM192A	0.725342	0.00059463
1421	EML4	0.821452	0.000607024
1422	NSUN6	1.14727	0.000607815
1423	CMTM7	1.97331	0.0006093
1424	TSPAN33	2.53818	0.000609978
1425	ATG9B	1.66832	0.00061291
1426	HSD17B10	0.91964	0.000613498
1427	CLEC11A	1.41611	0.000616599
1428	KCNAB3	2.32005	0.00062058
1429	TTLL12	1.22483	0.000621572
1430	MAGEB10	1.94544	0.000621707
1431	SMAP2	0.742208	0.000628539
1432	RANBP3	0.797172	0.000628783
1433	FAM117B	1.74724	0.000629886
1434	CHRNA7	1.42377	0.000631264
1435	QTRT1	0.709259	0.00063238
1436	ALG1L	0.631155	0.000635036
1437	FOXD2	0.88006	0.000635369
1438	EPT1	1.5369	0.000637897
1439	MRPL21	0.556277	0.000639598
1440	C8orf38	0.904804	0.000641096
1441	PINX1	1.30582	0.000641766
1442	BNIPL	0.896523	0.000641819
1443	RPS27	1.13461	0.000642445
1444	SOX7	1.65534	0.000643408
1445	KIF5C	2.52352	0.000643497
1446	KLRG1	1.80733	0.000645099
1447	HADHA	0.791812	0.000649985
1448	LOC727896	0.850603	0.000650895
1449	SRRT	0.654217	0.00065145
1450	TOP1MT	2.3036	0.000654806
1451	ANKRD18DP	1.99036	0.00066052
1452	C7orf41	0.940922	0.000660871
1453	PNPT1	0.932262	0.000661478
1454	LINC00471	0.670617	0.00066375
1455	RPS7	0.863199	0.00066948
1456	WDR43	0.517404	0.000669954
1457	MYH11	1.86984	0.000670748
1458	TMEM212	1.398	0.000672939
1459	TUFM	0.706814	0.000681726
1460	CCNB2	0.779613	0.000682117
1461	UCKL1	0.568175	0.000684981
1462	TMEM236	1.61748	0.000687419
1463	SIRPA	1.03125	0.00069375
1464	LOC100190940	0.979738	0.000696629
1465	TYRO3	0.996829	0.000696816
1466	NLGN2	0.807494	0.000697182
1467	CLCN2	0.849342	0.000697968
1468	UBAC2-AS1	1.72457	0.000699007
1469	IDH3B	0.714885	0.000700646
1470	IGFLR1	1.03774	0.000701332
1471	TRPM8	2.10045	0.000701524
1472	METTL8	1.47953	0.000701705
1473	SSBP4	0.811946	0.000701857
1474	ARRDC3	1.71289	0.000702852
1475	E4F1	0.676431	0.000703672
1476	RPIA	0.990992	0.00070768
1477	CORO2A	1.54679	0.000707832
1478	SFPQ	1.04774	0.000709519
1479	TPTE2P1	1.6352	0.000710642
1480	MRPL9	1.32037	0.000713045
1481	NUDT3	0.947919	0.000713955
1482	FUT6	1.27013	0.000716842
1483	GRM6	1.55172	0.000716983
1484	BIRC5	0.637287	0.000717676
1485	ZMYND19	0.685557	0.000717904
1486	PMF1-BGLAP	0.99891	0.000720356
1487	CHEK1	0.769731	0.000721975
1488	FXN	1.61093	0.000724868
1489	TUBA1A	1.00968	0.000725092
1490	BRWD3	1.96154	0.0007313
1491	RBM3	0.53644	0.000733097
1492	PCMTD2	0.998765	0.000736043
1493	WDR3	0.774716	0.00073798
1494	KIAA2018	1.36282	0.000739264
1495	CX3CL1	2.90169	0.000741991
1496	HMGN3	1.08809	0.000742399
1497	SATB2	1.42865	0.000743942
1498	C16orf59	0.909435	0.000744095
1499	HSP90AB1	0.648947	0.000744977
1500	COX17	0.693898	0.000748381
1501	MACROD2	1.61748	0.0007485
1502	CYFIP2	2.08881	0.000750078
1503	ARL14	2.54746	0.000750759
1504	LAPTM5	1.30116	0.000751213
1505	RPL39L	0.532265	0.000752061
1506	LOC286186	1.33669	0.000755569
1507	PAQR9	2.47926	0.000757696
1508	PGM5P2	1.51568	0.00075869
1509	UQCRBP1	0.583868	0.000762604
1510	CNNM3	1.0523	0.000763576
1511	CYB5B	0.728354	0.000765194
1512	DOCK10	2.22306	0.00076598
1513	RBMX	0.922947	0.000773356
1514	RAVER1	0.900231	0.000773377
1515	CHD4	0.695922	0.000777023
1516	MPDU1	1.00418	0.000777644
1517	ATF3	2.57926	0.000778963
1518	C17orf96	0.978522	0.000779302
1519	LOC100129138	1.53248	0.000780056
1520	ARHGAP42	1.39862	0.000781597
1521	NUDT14	0.952569	0.000782693
1522	DCLRE1C	1.24289	0.000783738
1523	APBA2	3.0955	0.000787157
1524	DKC1	0.642543	0.000791648
1525	RBM8A	0.625695	0.000794193
1526	METTL3	0.59693	0.000797842
1527	SEC14L2	1.96868	0.000801215
1528	MOGS	0.693479	0.000802394
1529	KIAA1324	1.63487	0.000817109
1530	MIR548AN	0.797523	0.000818983
1531	PCDHA9	1.19225	0.000827074
1532	COL13A1	1.27594	0.000828161
1533	FAM86C1	0.921193	0.000830341
1534	CYP27B1	1.96095	0.000839657
1535	PTP4A3	3.64947	0.000843478
1536	LINC00167	0.865005	0.000843965
1537	SDC3	1.38575	0.000844097
1538	LOC100128071	1.49101	0.000844931
1539	RPL12	0.682403	0.000845974
1540	CEP72	1.29616	0.000846387
1541	PELP1	1.13427	0.000847228
1542	FLVCR1	1.2802	0.000860054
1543	C16orf93	1.52901	0.000861256
1544	SNX4	1.19341	0.000865213
1545	LOC100240735	1.63814	0.000867624
1546	NDUFB10	0.699187	0.000868488
1547	TTI1	0.682056	0.00087111
1548	LOC283335	1.23415	0.000881395
1549	GABRB3	1.7392	0.000884175
1550	HNRNPK	0.72814	0.000887389
1551	C1orf123	0.858442	0.000891059
1552	KIF2C	0.838867	0.000891655
1553	RPL22	0.666054	0.000897651
1554	DAK	0.732514	0.00089904
1555	MINOS1	0.749167	0.000900194
1556	ASB13	1.25891	0.000903136
1557	HAPLN4	2.15648	0.000903422
1558	USP24	1.10348	0.00090785
1559	PAN2	1.12865	0.000909974
1560	ZNF548	0.853098	0.000916803
1561	DGAT2	2.63993	0.000920382
1562	SOD1	0.539766	0.000920603
1563	CRYM-AS1	1.64107	0.000922031
1564	SH3KBP1	1.26272	0.000926891
1565	KCNK6	1.72238	0.00093087
1566	CHEK2P2	1.49313	0.000931337
1567	DCPS	1.20166	0.000932114
1568	CENPF	0.917545	0.000935671
1569	MTRNR2L3	1.06813	0.00093579
1570	C11orf51	0.689571	0.000947455
1571	CCDC122	1.0781	0.000948396
1572	PPIF	1.08791	0.000953671
1573	DCX	3.54226	0.000956119
1574	FBXO7	0.869903	0.000966837
1575	CYCSP52	1.76456	0.000972315
1576	ETV3	1.76456	0.000972315
1577	FARSA	1.14296	0.000974639
1578	TSSC1	0.881709	0.000978007
1579	PEG10	3.39129	0.000978935
1580	SLIRP	0.837562	0.000979705
1581	ADCK3	1.46463	0.000988142
1582	LOC100506472	1.67771	0.00098907
1583	PEBP1	0.837611	0.00099012
1584	GP2	1.29737	0.000996511
1585	MDC1	0.86009	0.00099734
1586	ARHGEF26-AS1	1.22002	0.00100349
1587	GLOD4	0.582364	0.00100483
1588	TPTEP1	1.67432	0.00100905
1589	MLF1	1.04644	0.00101136
1590	TOP2A	0.621704	0.00101176
1591	VSTM2B	3.23571	0.00101264
1592	PAFAH1B2	1.27639	0.00101315
1593	UTP18	1.0004	0.00101515
1594	ZNF483	1.57882	0.00101594
1595	PTN	2.6225	0.00101727
1596	CPNE2	1.52638	0.00101753
1597	RNF138	0.94876	0.00101765
1598	CDCA3	0.917701	0.00101873
1599	LYPLA1	1.0962	0.00101999
1600	RAX2	1.12118	0.00102125
1601	HYAL2	0.90518	0.00102843
1602	USP46	0.970471	0.00102864
1603	TTF2	1.39838	0.00103544
1604	C10orf103	1.35681	0.00103798
1605	MSH5	1.26597	0.00104
1606	WDR90	0.763529	0.00104188
1607	HTRA4	1.37109	0.00104283
1608	HIST2H2AC	1.60173	0.00104586
1609	CXCL14	1.57848	0.00104613
1610	NME4	0.949721	0.00104847
1611	KIAA1456	1.71932	0.00105271
1612	ALPK1	1.40029	0.00105736
1613	SLC15A2	1.64144	0.00105886
1614	LINGO1	3.9139	0.00105978
1615	SRSF9	0.839532	0.00106461
1616	GTF3C6	0.658993	0.00107141
1617	CTNND2	2.90166	0.00107719
1618	CENPO	1.66027	0.00108047
1619	IRGM	0.961446	0.00108064
1620	HIRIP3	0.531888	0.00108196
1621	FAM184A	2.63624	0.00108723
1622	OFD1	0.730991	0.00108761
1623	NME2	0.57701	0.00108802
1624	LOC100506874	1.16497	0.00109682
1625	SETMAR	1.02695	0.00110242
1626	NOP2	0.805258	0.00110424
1627	SAFB	0.879555	0.00110636
1628	GAMT	1.51918	0.00112194
1629	GIMAP1	1.81746	0.00112926
1630	HSBP1	0.754341	0.00112952
1631	AFMID	1.26128	0.00113494
1632	M6PR	0.668176	0.00113719
1633	TESC	1.57784	0.0011395
1634	POLR3E	0.69665	0.00113981
1635	SARM1	0.981951	0.00114373
1636	CRYBB2P1	0.838491	0.00114447
1637	MTRNR2L1	1.31615	0.00114607
1638	SDCCAG3	0.521565	0.0011499
1639	TMEM45B	1.21338	0.00116002
1640	QRICH2	1.35488	0.00116053
1641	ATP5EP2	0.512315	0.00116388
1642	SNAP25	2.37127	0.00116556
1643	KLHDC4	1.05157	0.00116915
1644	UTP11L	0.539295	0.0011699
1645	COA5	0.54414	0.0011709
1646	HSP90AB3P	0.611392	0.00117232
1647	PUS7	0.896621	0.00117355
1648	EIF5A	0.693839	0.00117624
1649	EPHA3	1.27561	0.00117647
1650	SIGLEC11	1.62959	0.00117705
1651	MVK	1.56199	0.00119036
1652	RPL5	0.853327	0.00119103
1653	CXXC1	0.575417	0.00119311
1654	GATAD2B	0.726295	0.00119647
1655	ZBP1	1.07979	0.00119915
1656	DNM1	2.36577	0.00120242
1657	DDX11L10	0.733856	0.00120334
1658	C20orf27	1.06043	0.00120529
1659	DHX9	0.610616	0.00120644
1660	CCNB1	0.561275	0.00120945
1661	NLE1	1.52107	0.0012097
1662	NR2E3	0.88423	0.00121419
1663	FBXO48	1.2239	0.00121968
1664	C7orf55	1.19228	0.00122249
1665	DIP2A-IT1	1.14761	0.00122575
1666	FLJ42627	0.874669	0.00123375
1667	LRRC24	2.30885	0.00123472
1668	ILF2	0.80415	0.00123479
1669	DUSP16	0.911017	0.00123708
1670	SLC25A6	0.993466	0.00124003
1671	KIAA0922	1.50604	0.00124384
1672	SLX1B	0.835442	0.00124579
1673	ASTN1	2.16138	0.00124977
1674	KHK	1.67682	0.00125009
1675	UGT8	3.73874	0.00125625
1676	ADI1	0.587021	0.00125666
1677	C20orf203	1.2885	0.00125957
1678	HMG20A	0.821574	0.00126906
1679	OR51E2	1.1296	0.00127429
1680	USP49	1.46357	0.00127667
1681	LOC100128675	0.890329	0.00128538
1682	PHF5A	0.865037	0.00129809
1683	ZNF787	0.723494	0.00129824
1684	LOC100499227	1.67686	0.0012991
1685	LOC645212	0.647477	0.00130068
1686	ADPRHL2	0.807356	0.00130575
1687	GPR19	1.68874	0.00130826
1688	OTX2OS1	1.51589	0.00131612
1689	DHTKD1	0.947811	0.00131893
1690	ProSAPiP1	1.13915	0.0013226
1691	ANP32A-IT1	1.26037	0.00132319
1692	KCND2	2.5699	0.00132504
1693	LOC439949	1.18	0.00132589
1694	ZFP14	1.26944	0.00132834
1695	LOC728643	0.991002	0.00133205
1696	TBKBP1	1.83159	0.00133777
1697	SGTA	0.782613	0.00133895
1698	TRPT1	0.636389	0.00133958
1699	VSIG1	1.73535	0.00134133
1700	GNB4	1.10929	0.00134305
1701	CCDC97	1.19149	0.00134688
1702	GTSE1	0.649151	0.00134769
1703	SPTLC1	0.995321	0.00134849
1704	ZNF609	0.912144	0.00135163
1705	POLRMT	0.716147	0.0013521
1706	PART1	1.69775	0.00135218
1707	NAP1L6	0.775261	0.00135773
1708	SELK	0.617208	0.00136233
1709	CHAF1B	0.710326	0.00136536
1710	NUSAP1	0.83314	0.00137107
1711	CACNG8	1.54261	0.00137208
1712	C16orf91	0.678769	0.00137535
1713	C10orf125	1.15995	0.00138207
1714	MTUS1	2.09493	0.00138485
1715	MGC14436	1.33746	0.00138673
1716	TLE1	1.16063	0.00139176
1717	CELSR2	2.61746	0.0013924
1718	CD3G	1.19522	0.00139941
1719	RGS19	0.622711	0.00140918
1720	FAM59A	1.13573	0.00141386
1721	ZNF300	0.949919	0.00141906
1722	SUCLG1	0.669655	0.00142209
1723	FAM196A	1.45689	0.00142232
1724	CHTOP	0.824208	0.00142371
1725	TAF1C	0.779589	0.00142524
1726	C8orf55	1.5248	0.00144047
1727	FAM83E	0.953786	0.00144067
1728	PIPOX	1.834	0.00144302
1729	C17orf53	1.22758	0.00144496
1730	LOC389023	2.41413	0.00145521
1731	PUS1	0.855334	0.00146435
1732	FASTKD5	0.969902	0.00146505
1733	LINC00311	1.56953	0.00147079
1734	ATCAY	3.03711	0.00147782
1735	LOC100190938	1.3451	0.00148271
1736	H19	3.21474	0.00148396
1737	DLK1	4.72476	0.00148754
1738	RFT1	0.825503	0.00148899
1739	SLC38A3	3.37208	0.00149834
1740	ANKHD1	1.07748	0.00150073
1741	DPPA4	1.38019	0.0015013
1742	KLHDC8A	4.78102	0.00150236
1743	AFG3L1P	0.992297	0.00150256
1744	IPO4	0.647701	0.00150281
1745	LOC100506334	1.09613	0.00150554
1746	WNT6	2.65091	0.00150562
1747	SAA2	1.92613	0.00150639
1748	WDR17	1.32268	0.00150744
1749	HMGB1	1.3768	0.00150968
1750	C1orf140	1.57793	0.00151084
1751	NUP210L	1.49148	0.00151827
1752	REPIN1	0.988867	0.00152418
1753	C4orf48	1.09466	0.00152482
1754	C8orf77	1.29722	0.00153076
1755	LMO4	1.91674	0.00153421
1756	PRMT7	0.634113	0.00153743
1757	OSR1	3.10395	0.00154119
1758	KCNIP1	3.40462	0.00154271
1759	NOTUM	1.56614	0.00155519
1760	GRASP	3.21145	0.00155924
1761	C18orf21	0.687606	0.00156127
1762	UQCRH	0.687678	0.00156164
1763	TAF4	0.74999	0.0015628
1764	PHYHIPL	2.77661	0.00156587
1765	LOC100130581	1.00885	0.00156955
1766	WBSCR22	0.614782	0.00157387
1767	SPN	1.46401	0.0015739
1768	O3FAR1	1.25843	0.00158078
1769	CDHR1	2.65443	0.00158345
1770	PPCDC	1.06711	0.00158688
1771	UBE2N	0.604263	0.00158774
1772	MRPL39	0.92211	0.00159239
1773	LOC100507331	0.938778	0.00159586
1774	LINC00477	1.21247	0.0016038
1775	PLIN5	1.88841	0.0016043
1776	RPUSD2	1.2711	0.00160803
1777	GFOD2	1.1019	0.00160876
1778	IQCB1	0.795321	0.00161223
1779	LOC100507634	1.80843	0.00161639
1780	LGALSL	1.45266	0.00161959
1781	ZNF414	1.54553	0.00162382
1782	SPR	1.15839	0.00162432
1783	SNHG3	0.99769	0.00162533
1784	RBM19	1.97657	0.00162606
1785	IMPA2	2.31242	0.0016366
1786	FXYD1	3.22241	0.00163843
1787	C17orf69	1.79987	0.00164
1788	ADAMTS4	1.31517	0.00164073
1789	LOC100134868	1.28526	0.00165377
1790	CNKSR3	1.64144	0.00165799
1791	SELRC1	0.867401	0.00165892
1792	LOC283481	1.83088	0.00166944
1793	ELAVL4	1.82182	0.00167004
1794	TRIM28	0.515131	0.00167232
1795	DOK4	0.807491	0.0016747
1796	AURKAIP1	0.539129	0.00167895
1797	SHC3	3.5607	0.00168077
1798	WDPCP	1.73766	0.00168091
1799	FLJ34690	1.63193	0.00168324
1800	LOC389634	1.16755	0.00168441
1801	C16orf89	2.4556	0.00168528
1802	C20orf96	1.24336	0.00168794
1803	AARS2	1.23496	0.0016938
1804	ANKRD45	1.41427	0.00169515
1805	SCN11A	1.48759	0.001702
1806	RNF126	0.670425	0.00170577
1807	ST13P4	0.614494	0.00171494
1808	HMGCR	1.54312	0.00171742
1809	UBE2O	0.713613	0.00172057
1810	XYLB	1.59083	0.00173237
1811	DPM2	0.715027	0.00173524
1812	TP73	1.23237	0.00174158
1813	TMOD2	1.7039	0.00174528
1814	AOC4	1.17185	0.00174718
1815	BAALC	3.48218	0.00174925
1816	ZNF221	1.48927	0.00175781
1817	CENPA	1.1005	0.00176313
1818	COTL1	0.850885	0.00176592
1819	FLJ44511	1.03517	0.00176677
1820	WDR62	0.993734	0.00177146
1821	LOH12CR1	0.73165	0.00177542
1822	TRAIP	1.2479	0.0017783
1823	C9orf23	1.06107	0.00177918
1824	C3orf78	1.35135	0.00178486
1825	ABLIM2	2.01566	0.00178785
1826	CENPJ	1.51527	0.00178817
1827	EBPL	0.685439	0.00179745
1828	GNL2	0.926385	0.00179843
1829	TARS2	0.587568	0.00181208
1830	SPPL3	0.720304	0.00181368
1831	LY6G5B	0.788506	0.00181431
1832	ZNHIT6	1.51135	0.0018156
1833	CHDH	2.36083	0.00182051
1834	MAP3K9	1.02403	0.00182125
1835	ID4	2.27771	0.00183515
1836	THRB	1.46179	0.0018385
1837	ARGFXP2	1.51717	0.00183962
1838	CCT6P3	1.16563	0.00184645
1839	TSPAN7	3.26848	0.00185026
1840	NPHS1	1.56368	0.00185468
1841	MT1IP	0.904499	0.00185974
1842	HIBCH	0.712588	0.00186839
1843	LOC728640	0.945796	0.00187029
1844	RPS9	0.602226	0.00187117
1845	EHMT2	0.901175	0.00187244
1846	FAM100A	1.13946	0.00187771
1847	CLASP2	0.885674	0.00188448
1848	CDK3	0.881207	0.00188725
1849	IDAS	1.92823	0.00189154
1850	ALS2	1.08625	0.00189306
1851	PATZ1	1.00158	0.00189395
1852	ZNF542	1.36821	0.00189535
1853	LINC00526	1.66813	0.00189686
1854	KIAA0226L	2.39083	0.00190213
1855	FXYD7	3.03916	0.00190227
1856	EXOSC7	1.1489	0.00190278
1857	C19orf24	0.555858	0.00190381
1858	ACAD10	0.720247	0.00190532
1859	NUP188	0.520652	0.00190627
1860	C12orf61	1.55645	0.00190808
1861	C2CD4D	1.30144	0.00191251
1862	GSTTP2	1.26461	0.00191532
1863	MIA-RAB4B	4.49297	0.00191707
1864	OXNAD1	0.862809	0.00191918
1865	YWHAE	0.615767	0.00192032
1866	APOD	2.91823	0.00192612
1867	TM6SF2	1.622	0.00192979
1868	RNFT2	2.235	0.00193348
1869	C1orf94	2.86014	0.00193355
1870	ZNF652	0.921951	0.00193467
1871	POLE	0.754311	0.0019368
1872	RPRML	2.46428	0.00193836
1873	NSUN4	1.22523	0.00194117
1874	MAGEA12	3.27596	0.00194364
1875	EIF5AL1	0.558928	0.00195011
1876	TMEM69	0.644011	0.00195037
1877	PMPCA	0.943899	0.00197982
1878	MRPL42	0.652227	0.00198467
1879	EIF3K	0.517643	0.00198799
1880	PC	0.898989	0.00199079
1881	CHERP	0.672712	0.00201357
1882	WDR75	0.876822	0.00201705
1883	MIA	4.53837	0.00202324
1884	STK40	0.835573	0.00202465
1885	RPL3	0.820164	0.00202857
1886	PARS2	1.03998	0.00202862
1887	ATP1A3	3.03965	0.00203576
1888	INGX	1.26951	0.00203886
1889	BZW2	0.720555	0.00204
1890	LOC100506730	1.15399	0.00204441
1891	PPIG	0.926196	0.00205148
1892	CBS	1.08205	0.00205265
1893	ZNF620	1.44243	0.00205446
1894	LOC100505648	1.20378	0.00206415
1895	URB2	0.626329	0.00206828
1896	NMNAT3	2.25023	0.00207194
1897	C19orf73	1.15089	0.00207496
1898	NTRK3	1.89989	0.00208788
1899	LAMC2	1.14502	0.00208827
1900	OR7D2	1.23927	0.00208923
1901	ELAVL3	1.03207	0.00209358
1902	NUTF2	0.838636	0.002096
1903	DLL3	4.97181	0.00210855
1904	DNAJC2	0.946953	0.0021146
1905	EPHX2	2.04176	0.00211908
1906	ELOVL6	0.814153	0.0021195
1907	SCNN1G	1.16945	0.00213221
1908	HLA-DOA	0.951491	0.00215641
1909	NACA	0.663864	0.00215766
1910	HSP90AB4P	1.04492	0.00216153
1911	PXMP2	1.18846	0.00216559
1912	ANGPT2	1.67965	0.00216638
1913	ADD2	1.25713	0.00217292
1914	WHSC1	1.34007	0.00217298
1915	PRMT5	0.732045	0.00217563
1916	AKAP8	0.875253	0.00218526
1917	MRPS15	0.624071	0.00219079
1918	PPM1D	0.90083	0.00219251
1919	TMCC2	1.30435	0.00219307
1920	MRPL11	0.662924	0.00219746
1921	NHEJ1	1.13749	0.00219761
1922	CSPG4	1.32012	0.00220406
1923	TOMM6	0.644908	0.00220416
1924	PRKX	2.06095	0.00221835
1925	LOC100505783	0.817868	0.0022211
1926	LRRC8B	1.63288	0.0022234
1927	MS4A2	1.32329	0.00223633
1928	FUT4	1.25019	0.00223877
1929	NLRP8	1.48282	0.00224982
1930	FAM106A	1.31838	0.0022555
1931	TXNL4B	1.06685	0.00226017
1932	EARS2	0.538634	0.00227155
1933	PDIA6	0.693829	0.00227889
1934	EBP	0.63409	0.00228879
1935	DCAF10	1.36154	0.00229114
1936	PLEKHG1	1.58048	0.00229437
1937	C9orf142	0.712833	0.00229446
1938	DDT	0.950005	0.00230565
1939	ZNF24	0.533526	0.00230884
1940	DAP3	0.819389	0.00230944
1941	INTS1	0.596905	0.00232054
1942	BLMH	0.758973	0.00232153
1943	SLC25A15	0.583212	0.00232386
1944	BRD4	0.633555	0.00233094
1945	HTATSF1P2	1.17618	0.00233529
1946	MZT2A	0.616666	0.0023359
1947	FLJ45079	0.846192	0.00234033
1948	COX7B	0.828745	0.00234712
1949	TBL3	0.565522	0.0023553
1950	PUS3	0.912009	0.00236299
1951	SOX4	1.42793	0.00237338
1952	SF3A2	0.753945	0.00238051
1953	HSPA12A	1.92242	0.002383
1954	MED24	0.754344	0.00239051
1955	LOC100506046	1.06525	0.00239107
1956	NTRK2	3.3297	0.00239925
1957	OSBPL1A	0.957189	0.00239929
1958	LOC100130557	0.977007	0.00240074
1959	THAP4	1.1409	0.00240747
1960	GPR123	2.00327	0.00240848
1961	PPP2R3B	1.41612	0.00241123
1962	SLC39A14	1.41474	0.00241207
1963	HMGB3	0.725275	0.00241273
1964	SYNPO2	0.979321	0.00241436
1965	STK32B	1.93454	0.00243339
1966	MPL	0.853695	0.0024404
1967	HSPA9	0.856198	0.00244892
1968	C9orf153	1.43458	0.00245546
1969	ALS2CL	1.05205	0.0024584
1970	PARL	0.625771	0.00245912
1971	MAB21L3	1.40383	0.00246158
1972	FUK	0.989107	0.00246574
1973	GJC3	1.14741	0.00246696
1974	HAUS8	0.75501	0.00246919
1975	ULK3	0.763113	0.00247293
1976	ALK	1.77384	0.00247639
1977	LYSMD2	1.21908	0.00249027
1978	FLJ30838	1.34288	0.00249123
1979	XAF1	1.61799	0.00249949
1980	HIST1H2AM	2.07117	0.00250053
1981	LOC90834	1.25131	0.0025038
1982	DCD	1.03269	0.0025073
1983	EEF1A2	3.06563	0.00251253
1984	LRRC19	0.758507	0.00251725
1985	AGER	1.50023	0.00252762
1986	NDUFA10	1.14406	0.00252765
1987	RUNDC3A	2.39159	0.00252839
1988	MS4A10	1.23724	0.00253097
1989	TCERG1	0.696129	0.00253582
1990	ACIN1	0.577457	0.0025361
1991	EXOSC2	0.758619	0.00253695
1992	SFSWAP	0.575764	0.00253989
1993	LOC100289561	0.932811	0.00254056
1994	EEF1D	0.742876	0.00256105
1995	BTBD3	1.52238	0.002563
1996	CDK10	1.06937	0.00257332
1997	SIGLEC10	1.71438	0.00258053
1998	KLHDC7A	0.625637	0.00259073
[truncated: 1,877 more rows]
